# Supplementary material for: Changes in Cat Facial Morphology Are Related to Interaction with Humans
Source: MDPI journal article supplement (doi:10.3390/ani12243493), 2022-12-10
Supplement: s1 [file s1]

## Supplementary Materials

**Table S1.** List of owned domestic purebreds.

| Breed                | n  |
|----------------------|----|
| Abyssinian           | 50 |
| American Bobtail     | 50 |
| American Curl        | 50 |
| American Shorthair   | 50 |
| American Wirehair    | 33 |
| Australian Mist      | 20 |
| Balinese             | 25 |
| Bengal               | 50 |
| Birman               | 50 |
| Bombay               | 50 |
| British Shorthair    | 50 |
| Burmese              | 50 |
| Burmilla             | 50 |
| Chartreux            | 50 |
| Chausie              | 20 |
| Colorpoint Shorthair | 20 |
| Cornish Rex          | 50 |
| Cymric               | 22 |
| DevonRex             | 50 |
| Donskoy              | 23 |
| Egyptian Mau         | 50 |
| European Shorthair   | 20 |
| Exotic               | 50 |
| Havana Brown         | 50 |
| Himalayan            | 27 |
| Japanese Bobtail     | 50 |
| Khao Manee           | 50 |
| Korat                | 50 |
| Kurilian Bobtail     | 34 |
| LaPerm               | 32 |
| Lykoi                | 22 |
| Maine Coon           | 50 |
| Manx                 | 50 |
| Minuet               | 31 |
| Munchkin             | 34 |
| Nebelung             | 26 |
| Norwegian Forestcat  | 50 |
| Ocicat               | 50 |
| Oriental             | 50 |
| Persian              | 50 |
| Peterbald            | 32 |
| Pixiebob             | 27 |
| Raga Muffin          | 29 |
| Ragdoll              | 50 |
| Russian Blue         | 50 |
| Savannah             | 22 |

|                |    |
|----------------|----|
| Scottish Fold  | 50 |
| Selkirk Rex    | 50 |
| Siamese        | 50 |
| Siberian       | 50 |
| Singapura      | 50 |
| Snowshoe       | 22 |
| Sokoke         | 20 |
| Somali         | 50 |
| Sphynx         | 50 |
| Thai           | 20 |
| Tonkinese      | 50 |
| Toyger         | 23 |
| Turkish Angora | 50 |
| Turkish Van    | 50 |

**Table S2.** List of Fe-BARQ sections.

| Factor                                      | Number of items |
|---------------------------------------------|-----------------|
| General activity/Playfulness                | 14              |
| Sociability with people                     | 7               |
| Directed vocalization                       | 4               |
| Purring                                     | 2               |
| Attention-seeking                           | 2               |
| Sociability with cats                       | 3               |
| Stranger-directed aggression                | 3               |
| Owner-directed aggression/Touch sensitivity | 4               |
| Resistance to restraint                     | 4               |
| Familiar cat aggression                     | 4               |
| Dog aggression                              | 5               |
| Fear of unfamiliar dogs/cats                | 2               |
| Fear of novelty                             | 2               |
| Separation-related behavior                 | 6               |
| Trainability                                | 3               |
| Predatory behavior                          | 3               |
| Prey interest                               | 2               |
| Sleeping location preferences               | 3               |
| Excessive/compulsive self-grooming          | 3               |
| Other compulsive behaviors                  | 3               |
| Inappropriate elimination                   | 2               |
| Elimination preferences                     | 2               |

**Table S3.** Attributes of the survey participants (whether they own cats, like cats, or like dogs).

|                                                | All | Who like cats | Who like cats as<br>much as dogs | Who like dogs |
|------------------------------------------------|-----|---------------|----------------------------------|---------------|
| Males with experience in cat<br>ownership      | 44  | 28            | 9                                | 7             |
| Males with no experience in cat<br>ownership   | 43  | 14            | 7                                | 22            |
| Females with experience in cat<br>ownership    | 144 | 115           | 24                               | 5             |
| Females with no experience in<br>cat ownership | 121 | 52            | 26                               | 43            |
