# Supplementary material for: Changes in Cat Facial Morphology Are Related to Interaction with Humans
Source: Animals (Basel). 2022 Dec 10;12(24):3493. doi: 10.3390/ani12243493 (PMC9774281; doi:10.3390/ani12243493)
Supplement: Supplementary file 1 [file animals-12-03493-s001.zip › animals-12025369-supplementary_1209.xlsx]

## Sheet: Study1_African wildcat
ID	A（pixel）	B（pixel）	C（Angle)	D（Angle)	B/A	(C+D)/2
0001	142	187	23.9	25.9	1.3169	24.9
0002	131	172	27.5	28.6	1.31298	28.05
0003	91	137	26.3	21	1.50549	23.65
0004	100	146	27.8	23.1	1.46	25.45
0005	98	120	29.3	29	1.22449	29.15
0006	30	44	33.1	27.4	1.46667	30.25
0007	32	47	27.2	24.4	1.46875	25.8
0008	99	130	23.8	22.9	1.31313	23.35
0009	37	52	22.7	23.4	1.40541	23.05
0010	40	52	23.6	21.8	1.3	22.7
0011	83	124	18.1	23.4	1.49398	20.75
0012	30	40	24.6	21.3	1.33333	22.95
0013	30	40	19.65	21.44	1.33333	20.545
0014	36	50	26.5	25	1.38889	25.75
0015	38	47	25.8	26.5	1.23684	26.15
0016	21	22	25	26.5	1.04762	25.75
0017	31	42	23.9	23.7	1.35484	23.8
0018	77	93	21.9	26.9	1.20779	24.4
0019	41	54	22.9	18.4	1.31707	20.65
0020	39	44	21.4	26.5	1.12821	23.95
0021	29	39	29.4	28.4	1.34483	28.9
0022	58	72	30.3	30.4	1.24138	30.35
0023	114	150	24.3	24.2	1.31579	24.25
0024	81	93	28.4	24	1.14815	26.2
0025	64	84	27.8	31.4	1.3125	29.6
0026	75	97	29.3	28.4	1.29333	28.85
0027	29	39	29.9	31.6	1.34483	30.75
0028	45	60	25.9	25.9	1.33333	25.9
0029	32	43	24.7	26.5	1.34375	25.6
0030	76	100	26.2	28.7	1.31579	27.45
0031	28	37	29.2	28.3	1.32143	28.75
0032	97	151	27	30.7	1.5567	28.85
0033	88	110	20.1	23.8	1.25	21.95
0034	131	172	19.3	22	1.31298	20.65
0035	87	102	23.4	19.7	1.17241	21.55
0036	117	174	28.8	27.2	1.48718	28
0037	128	176	18	23.3	1.375	20.65
0038	147	208	28.8	24.9	1.41497	26.85
0039	117	191	22.9	22.4	1.63248	22.65
0040	79	117	26.2	28.3	1.48101	27.25
0041	114	134	27.1	25.2	1.17544	26.15
0042	121	158	23.8	26.8	1.30579	25.3
0043	115	161	30	30.8	1.4	30.4
0044	94	135	19.1	23.7	1.43617	21.4
0045	89	128	31.6	30.6	1.4382	31.1
0046	79	110	28	24.3	1.39241	26.15
0047	100	132	29.6	30.3	1.32	29.95
0048	28	42	23.4	23.9	1.5	23.65
0049	119	149	22.6	26.2	1.2521	24.4
0050	92	124	25.7	25.9	1.34783	25.8

## Sheet: Study1_feral mixed breed
ID	Island	A（pixel）	B（pixel）	C（Angle)	D（Angle)	B/A	(C+D)/2
0051	Mikura Island	163	232	28.5	29.9	1.42331	29.2
0052	Mikura Island	232	279	22.9	24.2	1.20259	23.55
0053	Mikura Island	216	203	22.5	22.7	0.939815	22.6
0054	Mikura Island	127	155	23.4	28.7	1.22047	26.05
0055	Mikura Island	155	178	27.8	30	1.14839	28.9
0056	Mikura Island	127	154	30.2	31.1	1.2126	30.65
0057	Mikura Island	326	403	22.5	23	1.2362	22.75
0058	Mikura Island	375	533	24.3	21.4	1.42133	22.85
0059	Mikura Island	147	187	22.1	24.2	1.27211	23.15
0060	Mikura Island	256	322	28.2	23.8	1.25781	26
0061	Mikura Island	287	385	21.2	23.5	1.34146	22.35
0062	Mikura Island	68	95	27.8	24.9	1.39706	26.35
0063	Mikura Island	128	156	21.6	19.5	1.21875	20.55
0064	Mikura Island	136	135	15.1	25	0.992647	20.05
0065	Mikura Island	90	97	18.4	18.6	1.07778	18.5
0066	Mikura Island	509	628	22.9	24	1.23379	23.45
0067	Mikura Island	436	582	27.3	27	1.33486	27.15
0068	Mikura Island	49	70	28.3	22.3	1.42857	25.3
0069	Mikura Island	118	142	26.5	27.8	1.20339	27.15
0070	Mikura Island	147	200	28.6	23	1.36054	25.8
0071	Mikura Island	458	584	28.5	29.5	1.27511	29
0072	Mikura Island	307	427	22.6	23.8	1.39088	23.2
0073	Mikura Island	121	142	19.3	20	1.17355	19.65
0074	Mikura Island	70	88	21	23.6	1.25714	22.3
0075	Mikura Island	63	78	29.4	26.5	1.2381	27.95
0076	Mikura Island	455	574	28.2	28.9	1.26154	28.55
0077	Mikura Island	155	229	23.9	20	1.47742	21.95
0078	Mikura Island	136	171	24.9	23.19	1.25735	24.045
0079	Mikura Island	103	134	30.1	31.4	1.30097	30.75
0080	Mikura Island	138	191	24.6	23.3	1.38406	23.95
0081	Mikura Island	109	150	25.6	26.5	1.37615	26.05
0082	Mikura Island	152	166	27.5	29.2	1.09211	28.35
0083	Mikura Island	119	178	26.9	28.5	1.4958	27.7
0084	Mikura Island	123	154	25.5	26.8	1.25203	26.15
0085	Mikura Island	149	154	25.4	23	1.03356	24.2
0086	Mikura Island	122	166	24	27	1.36066	25.5
0087	Mikura Island	132	164	21.3	22.3	1.24242	21.8
0088	Mikura Island	144	198	23.2	23.3	1.375	23.25
0089	Mikura Island	120	166	24.3	23.9	1.38333	24.1
0090	Mikura Island	103	122	27.1	29.4	1.18447	28.25
0091	Mikura Island	120	155	26.1	24.9	1.29167	25.5
0092	Mikura Island	153	183	21.5	21	1.19608	21.25
0093	Mikura Island	128	168	26.3	24.6	1.3125	25.45
0094	Mikura Island	134	149	33.1	35.9	1.11194	34.5
0095	Mikura Island	115	156	20.1	23.7	1.35652	21.9
0096	Mikura Island	104	154	23.4	23.4	1.48077	23.4
0097	Mikura Island	173	228	20.8	23	1.31792	21.9
0098	Mikura Island	101	127	20.6	20.7	1.25743	20.65
0099	Mikura Island	77	109	22.1	22.2	1.41558	22.15
0100	Mikura Island	76	105	28.9	25.3	1.38158	27.1
3223	Amami-Oshima Island	45	65	22.2	25.5	1.44444	23.85
3224	Amami-Oshima Island	53	66	22.8	25.2	1.24528	24
3225	Amami-Oshima Island	183	243	29.7	28.4	1.32787	29.05
3226	Amami-Oshima Island	145	194	26.2	25	1.33793	25.6
3227	Amami-Oshima Island	147	231	29.3	33	1.57143	31.15
3228	Amami-Oshima Island	151	218	24.7	30.8	1.44371	27.75
3229	Amami-Oshima Island	106	145	26	26.3	1.36792	26.15
3230	Amami-Oshima Island	145	189	21.8	23.2	1.30345	22.5
3231	Amami-Oshima Island	107	145	28.9	28.2	1.35514	28.55
3232	Amami-Oshima Island	114	174	23.8	26.1	1.52632	24.95
3233	Amami-Oshima Island	140	204	32.3	30.1	1.45714	31.2
3234	Amami-Oshima Island	205	319	26	26.5	1.5561	26.25
3235	Amami-Oshima Island	188	232	22.5	27.3	1.23404	24.9
3236	Amami-Oshima Island	104	145	25.5	26.8	1.39423	26.15
3237	Amami-Oshima Island	174	234	29.1	27.9	1.34483	28.5
3238	Amami-Oshima Island	39	50	20.9	25.1	1.28205	23
3239	Amami-Oshima Island	47	75	31.1	25	1.59574	28.05
3240	Amami-Oshima Island	57	81	26	19.8	1.42105	22.9
3241	Amami-Oshima Island	30	41	28.4	25.7	1.36667	27.05
3242	Amami-Oshima Island	39	46	25.2	27.2	1.17949	26.2
3243	Amami-Oshima Island	201	262	26.5	24.6	1.30348	25.55
3244	Amami-Oshima Island	49	57	26.5	25.9	1.16327	26.2
3245	Amami-Oshima Island	97	137	27.9	25.7	1.41237	26.8
3246	Amami-Oshima Island	96	138	26.5	24.7	1.4375	25.6
3247	Amami-Oshima Island	97	180	25.2	28	1.85567	26.6
3248	Amami-Oshima Island	99	104	26.2	29.1	1.05051	27.65
3249	Amami-Oshima Island	71	79	24	26	1.11268	25
3250	Amami-Oshima Island	68	89	31.3	29.5	1.30882	30.4
3251	Amami-Oshima Island	150	210	30.5	30.7	1.4	30.6
3252	Amami-Oshima Island	94	125	24.8	28.5	1.32979	26.65
3253	Amami-Oshima Island	41	51	26.5	28.8	1.2439	27.65
3254	Amami-Oshima Island	65	92	26.2	30.4	1.41538	28.3
3255	Amami-Oshima Island	113	142	28.4	23.1	1.25664	25.75
3256	Amami-Oshima Island	106	149	30.2	28.8	1.40566	29.5
3257	Amami-Oshima Island	62	102	29.6	27.4	1.64516	28.5
3258	Amami-Oshima Island	52	72	28	27.5	1.38462	27.75
3259	Amami-Oshima Island	36	57	27.2	25.1	1.58333	26.15
3260	Amami-Oshima Island	170	209	28.4	27.3	1.22941	27.85
3261	Amami-Oshima Island	52	64	22	21.1	1.23077	21.55
3262	Amami-Oshima Island	52	73	29	27.8	1.40385	28.4
3263	Amami-Oshima Island	81	105	30.9	29.9	1.2963	30.4
3264	Amami-Oshima Island	132	170	23.9	29.2	1.28788	26.55
3265	Amami-Oshima Island	88	109	26.9	23.9	1.23864	25.4
3266	Amami-Oshima Island	60	72	28.9	22.4	1.2	25.65
3267	Amami-Oshima Island	148	204	24.5	27.5	1.37838	26
3268	Amami-Oshima Island	98	139	32.2	28.4	1.41837	30.3
3269	Amami-Oshima Island	45	61	25.3	24.5	1.35556	24.9
3270	Amami-Oshima Island	45	53	31.7	25.2	1.17778	28.45
3271	Amami-Oshima Island	60	80	28.2	27.9	1.33333	28.05
3272	Amami-Oshima Island	73	93	28.6	26.5	1.27397	27.55
3273	Ogasawara Islands	17	21	25	26.5	1.23529	25.75
3274	Ogasawara Islands	12	16	28.6	30.2	1.33333	29.4
3275	Ogasawara Islands	118	182	25	28.5	1.54237	26.75
3276	Ogasawara Islands	92	124	23.1	22.6	1.34783	22.85
3277	Ogasawara Islands	108	114	23.2	21	1.05556	22.1
3278	Ogasawara Islands	112	118	20.9	23	1.05357	21.95
3279	Ogasawara Islands	103	141	22.2	26.8	1.36893	24.5
3280	Ogasawara Islands	60	80	27.4	26.5	1.33333	26.95
3281	Ogasawara Islands	63	93	30.1	29	1.47619	29.55
3282	Ogasawara Islands	167	229	20.8	21.5	1.37126	21.15
3283	Ogasawara Islands	88	99	18.9	22	1.125	20.45
3284	Ogasawara Islands	180	248	29.2	32.9	1.37778	31.05
3285	Ogasawara Islands	123	146	26.1	26	1.18699	26.05
3286	Ogasawara Islands	142	198	32.2	25.1	1.39437	28.65
3287	Ogasawara Islands	87	126	24.8	28.6	1.44828	26.7
3288	Ogasawara Islands	116	152	21.9	24.1	1.31034	23
3289	Ogasawara Islands	38	48	29.9	24.5	1.26316	27.2
3290	Ogasawara Islands	21	25	27.8	26.5	1.19048	27.15
3291	Ogasawara Islands	25	35	18.4	25.4	1.4	21.9
3292	Ogasawara Islands	11	16	24.4	24.4	1.45455	24.4
3293	Ogasawara Islands	19	23	19.6	21.8	1.21053	20.7
3294	Ogasawara Islands	17	26	23.1	19.6	1.52941	21.35
3295	Ogasawara Islands	16	20	20.5	22.3	1.25	21.4
3296	Ogasawara Islands	25	33	18.4	23.6	1.32	21
3297	Ogasawara Islands	19	24	19.6	15.9	1.26316	17.75
3298	Ogasawara Islands	13	22	17.1	21	1.69231	19.05
3299	Ogasawara Islands	40	49	20.1	25.7	1.225	22.9
3200	Ogasawara Islands	22	30	26.5	26.5	1.36364	26.5
3201	Ogasawara Islands	12	17	22.6	21.8	1.41667	22.2
3202	Ogasawara Islands	14	18	16.6	15.2	1.28571	15.9
3203	Ogasawara Islands	12	16	21.8	18.4	1.33333	20.1
3204	Ogasawara Islands	21	27	18.4	25	1.28571	21.7
3205	Ogasawara Islands	19	27	26.5	26.5	1.42105	26.5
3206	Ogasawara Islands	33	36	20.8	25.3	1.09091	23.05
3207	Ogasawara Islands	87	123	24.5	27.9	1.41379	26.2
3208	Ogasawara Islands	72	99	32.1	24.7	1.375	28.4
3209	Ogasawara Islands	87	136	30.7	28.1	1.56322	29.4
3210	Ogasawara Islands	60	91	25.5	23.1	1.51667	24.3
3211	Ogasawara Islands	75	92	22.4	29	1.22667	25.7
3212	Ogasawara Islands	41	50	19.5	24,1	1.21951	19.5
3213	Ogasawara Islands	34	53	24.1	24.4	1.55882	24.25
3214	Ogasawara Islands	42	53	25.8	26.5	1.2619	26.15
3215	Ogasawara Islands	30	44	22.4	23.1	1.46667	22.75
3216	Ogasawara Islands	86	117	26.5	23.7	1.36047	25.1
3217	Ogasawara Islands	41	54	25.1	23.4	1.31707	24.25
3218	Ogasawara Islands	64	84	33	29.8	1.3125	31.4
3219	Ogasawara Islands	44	48	19.5	22.4	1.09091	20.95
3220	Ogasawara Islands	51	72	25.9	23	1.41176	24.45
3221	Ogasawara Islands	48	49	25.1	27.2	1.02083	26.15
3222	Ogasawara Islands	61	75	24.9	24.4	1.22951	24.65

## Sheet: Study1_domestic mixed breed
ID	A（pixel）	B（pixel）	C（Angle)	D（Angle)	B/A	(C+D)/2
0101	322	356	26.2	27.8	1.10559	27
0102	308	407	28	28.8	1.32143	28.4
0103	174	244	25.5	26.2	1.4023	25.85
0104	285	370	26.4	27.8	1.29825	27.1
0105	438	571	25.5	25.7	1.30365	25.6
0106	345	511	25.1	24	1.48116	24.55
0107	269	392	25.6	24.9	1.45725	25.25
0108	187	204	20.3	27.6	1.09091	23.95
0109	167	270	21.1	19.6	1.61677	20.35
0110	292	368	26.9	25.9	1.26027	26.4
0111	388	403	22.1	23	1.03866	22.55
0112	425	530	27.4	29	1.24706	28.2
0113	70	88	23.4	27	1.25714	25.2
0114	92	123	29.2	26.2	1.33696	27.7
0115	262	339	27.4	29	1.29389	28.2
0116	239	287	25.1	25	1.20084	25.05
0117	267	380	30.8	30.1	1.42322	30.45
0118	134	156	24	22.7	1.16418	23.35
0119	320	360	23.7	24.8	1.125	24.25
0120	439	529	19.2	22.7	1.20501	20.95
0121	366	466	26.2	23.7	1.27322	24.95
0122	186	240	25.8	28.6	1.29032	27.2
0123	121	163	26.8	28.4	1.34711	27.6
0124	166	242	26.2	25.3	1.45783	25.75
0125	52	67	27.6	27	1.28846	27.3
0126	134	199	26.3	27.8	1.48507	27.05
0127	435	628	23.8	25.9	1.44368	24.85
0128	410	553	25.4	23	1.34878	24.2
0129	182	207	21.3	24.7	1.13736	23
0130	157	197	27.8	27.5	1.25478	27.65
0131	326	410	24.6	24.1	1.25767	24.35
0132	94	139	24.4	26,5	1.47872	24.4
0133	331	421	22.2	24.9	1.2719	23.55
0134	173	201	22.2	22	1.16185	22.1
0135	140	160	19.4	15.9	1.14286	17.65
0136	159	159	24.9	21.9	1	23.4
0137	143	214	29.3	29.5	1.4965	29.4
0138	168	199	30	30.7	1.18452	30.35
0139	193	261	17	17.3	1.35233	17.15
0140	198	219	25.2	21.1	1.10606	23.15
0141	191	187	23	24.6	0.979058	23.8
0142	185	234	31.4	31.4	1.26486	31.4
0143	165	221	28.4	28.9	1.33939	28.65
0144	128	167	26.3	26.8	1.30469	26.55
0145	194	269	18	16.1	1.3866	17.05
0146	146	188	25.8	24.9	1.28767	25.35
0147	191	214	26	20.2	1.12042	23.1
0148	159	220	28.4	24.7	1.38365	26.55
0149	161	185	15.3	13.6	1.14907	14.45
0150	168	202	22.6	18.8	1.20238	20.7
0151	190	203	14.1	18.9	1.06842	16.5
0152	175	180	22	16.3	1.02857	19.15
0153	201	243	22.4	25.1	1.20896	23.75
0154	201	263	27.6	25.6	1.30846	26.6
0155	161	196	27.8	21.6	1.21739	24.7
0156	155	214	21.8	19.7	1.38065	20.75
0157	155	134	22.2	26.8	0.864516	24.5
0158	150	211	28.9	30.5	1.40667	29.7
0159	135	202	28.3	29.3	1.4963	28.8
0160	126	149	27.5	27.2	1.18254	27.35
0161	160	154	20.2	18	0.9625	19.1
0162	119	191	19.1	21.1	1.60504	20.1
0163	179	209	25.2	22.4	1.1676	23.8
0164	121	144	27.4	29.9	1.19008	28.65
0165	168	201	21.9	21.6	1.19643	21.75
0166	170	163	26.76	25.97	0.958824	26.365
0167	105	126	21.9	26.3	1.2	24.1
0168	150	177	23	22.6	1.18	22.8
0169	114	127	22.2	21.1	1.11404	21.65
0170	163	210	27.3	26.3	1.28834	26.8
0171	131	167	25.6	28	1.27481	26.8
0172	154	175	18.4	21.8	1.13636	20.1
0173	168	182	23.7	23.3	1.08333	23.5
0174	96	124	22.2	24	1.29167	23.1
0175	146	192	25.4	22.1	1.31507	23.75
0176	135	158	23.9	23.3	1.17037	23.6
0177	199	218	20.3	20.8	1.09548	20.55
0178	171	181	27	25.8	1.05848	26.4
0179	138	177	31.1	32.5	1.28261	31.8
0180	103	127	30.3	30.9	1.23301	30.6
0181	186	287	31.9	32.9	1.54301	32.4
0182	151	229	29.4	29.6	1.51656	29.5
0183	181	209	29.4	31.4	1.1547	30.4
0184	130	149	26.8	28.9	1.14615	27.85
0185	136	171	26.1	25.7	1.25735	25.9
0186	137	181	29.1	31.9	1.32117	30.5
0187	105	120	24.6	25.2	1.14286	24.9
0188	161	192	25.7	28.4	1.19255	27.05
0189	182	256	26.8	30.1	1.40659	28.45
0190	178	230	29.1	31.7	1.29213	30.4
0191	142	160	22.7	23.8	1.12676	23.25
0192	105	147	32	33.6	1.4	32.8
0193	158	226	25.3	27.6	1.43038	26.45
0194	146	191	30.2	31.6	1.30822	30.9
0195	146	147	18.7	22	1.00685	20.35
0196	175	230	34.8	33.1	1.31429	33.95
0197	167	230	24	26.5	1.37725	25.25
0198	153	215	26.3	26.9	1.40523	26.6
0199	140	182	22.8	23	1.3	22.9
0200	151	200	31.1	30	1.3245	30.55
0201	156	179	29.5	28.2	1.14744	28.85
0202	211	239	26.7	28.3	1.1327	27.5
0203	165	216	28	28.8	1.30909	28.4
0204	123	119	25.6	23.3	0.96748	24.45
0205	200	217	28.6	29.5	1.085	29.05
0206	154	181	24.9	27.1	1.17532	26
0207	144	150	23.1	23.1	1.04167	23.1
0208	142	150	27	27.2	1.05634	27.1
0209	190	229	27.2	30.4	1.20526	28.8
0210	141	163	32.4	29.4	1.15603	30.9
0211	167	192	25.2	26.9	1.1497	26.05
0212	186	185	23	25.9	0.994624	24.45
0213	138	169	22.6	25	1.22464	23.8
0214	169	223	25.8	27	1.31953	26.4
0215	123	141	28.2	29.8	1.14634	29
0216	168	202	23.6	26.1	1.20238	24.85
0217	154	206	26.3	28.5	1.33766	27.4
0218	191	242	26.3	27.2	1.26702	26.75
0219	192	253	27.5	27	1.31771	27.25
0220	110	130	26	27.4	1.18182	26.7
0221	158	197	23.1	22.6	1.24684	22.85
0222	231	258	24.9	24	1.11688	24.45
0223	158	214	29.8	26	1.35443	27.9
0225	153	192	24.6	23.9	1.2549	24.25
0226	139	173	20.7	20.1	1.2446	20.4
0227	144	185	26.1	29.7	1.28472	27.9
0228	133	177	23.2	25	1.33083	24.1
0229	136	189	25.7	24.9	1.38971	25.3
0230	200	288	23.6	26.1	1.44	24.85
0231	192	174	21.3	20.4	0.90625	20.85
0232	150	195	26.1	27.1	1.3	26.6
0233	178	213	28.4	25.9	1.19663	27.15
0234	135	171	29.8	30.3	1.26667	30.05
0235	164	253	24.5	25.6	1.54268	25.05
0236	122	168	14	14.8	1.37705	14.4
0237	157	241	18	21	1.53503	19.5
0238	149	180	26.9	28.7	1.20805	27.8
0239	145	203	21.4	21.4	1.4	21.4
0240	172	200	30.4	28.7	1.16279	29.55
0241	134	167	17.8	20	1.24627	18.9
0242	193	254	26	30.6	1.31606	28.3
0243	101	116	25	27.1	1.14851	26.05
0244	222	302	26.9	28.1	1.36036	27.5
0245	165	227	23.5	23.9	1.37576	23.7
0246	153	218	27.5	29.4	1.42484	28.45
0247	115	157	24.8	27.2	1.36522	26
0248	115	163	28.7	28.1	1.41739	28.4
0249	168	173	19.9	20.6	1.02976	20.25
0250	163	175	23	24.2	1.07362	23.6
0251	158	163	26.3	27.9	1.03165	27.1
0252	72	83	23.6	29.1	1.15278	26.35
0253	196	255	33	29.8	1.30102	31.4
0254	116	169	20.2	22.7	1.4569	21.45
0255	135	160	26.7	30.3	1.18519	28.5
0256	151	187	28.7	30.2	1.23841	29.45
0257	129	153	26.1	28.7	1.18605	27.4
0258	147	227	25.6	25	1.54422	25.3
0259	163	217	25.1	25.7	1.33129	25.4
0260	183	211	24.7	25.4	1.15301	25.05
0261	127	117	17.2	18.8	0.92126	18
0262	122	129	23.9	23.2	1.05738	23.55
0263	127	171	28.7	30.5	1.34646	29.6
0264	166	187	30.1	31.6	1.12651	30.85
0265	183	217	26.3	25.2	1.18579	25.75
0266	166	206	27.1	27.9	1.24096	27.5
0267	145	149	23.7	24.5	1.02759	24.1
0268	113	145	22.4	22.7	1.28319	22.55
0269	149	192	24.4	25.1	1.28859	24.75
0270	168	188	27.2	28.5	1.11905	27.85
0271	176	212	25.8	27.7	1.20455	26.75
0272	124	162	25.6	26.7	1.30645	26.15
0273	161	213	23.9	26.3	1.32298	25.1
0274	193	221	29.4	27.8	1.14508	28.6
0275	131	135	22.4	22.3	1.03053	22.35
0276	133	171	23.3	25.4	1.28571	24.35
0277	142	130	21.4	23	0.915493	22.2
0278	194	214	25.4	27.1	1.10309	26.25
0279	131	124	19.1	22.3	0.946565	20.7
0280	182	229	24.3	24.1	1.25824	24.2
0281	189	238	25.7	26.4	1.25926	26.05
0282	157	162	27.3	26.1	1.03185	26.7
0283	134	172	23.3	24.1	1.28358	23.7
0284	104	122	22.8	21.6	1.17308	22.2
0285	147	184	18	22.7	1.2517	20.35
0286	136	149	22.6	24.4	1.09559	23.5
0287	181	192	20	21.5	1.06077	20.75
0288	153	191	24.8	27.5	1.24837	26.15
0289	145	182	30.6	33.6	1.25517	32.1
0290	141	173	19.2	19.8	1.22695	19.5
0291	213	242	24.3	25.9	1.13615	25.1
0292	152	189	25.7	25.6	1.24342	25.65
0293	188	259	23.4	25.8	1.37766	24.6
0294	96	127	23	25.6	1.32292	24.3
0295	131	165	25.3	26.3	1.25954	25.8
0296	119	150	25	24.3	1.2605	24.65
0297	188	231	22.8	30.5	1.22872	26.65
0298	145	182	30	30.8	1.25517	30.4
0299	117	156	18.7	20	1.33333	19.35
0300	146	178	25.8	22.9	1.21918	24.35
0301	194	225	23.3	25.4	1.15979	24.35
0302	154	205	23	26.9	1.33117	24.95
0303	126	172	34.1	34.7	1.36508	34.4
0304	81	93	23.4	26.9	1.14815	25.15
0305	70	93	28	30.9	1.32857	29.45
0306	66	72	29.9	32	1.09091	30.95
0307	112	106	15.6	19.7	0.946429	17.65
0308	136	171	21.7	24.8	1.25735	23.25
0309	120	158	21.2	20.5	1.31667	20.85
0310	182	236	18.6	22	1.2967	20.3
0311	126	161	27	27.9	1.27778	27.45
0312	148	164	21.8	22.1	1.10811	21.95
0313	104	126	27.4	24.6	1.21154	26
0314	160	183	25.1	28.6	1.14375	26.85
0315	143	163	29.2	28.5	1.13986	28.85
0316	171	234	25	27.5	1.36842	26.25
0317	166	159	21.9	23.1	0.957831	22.5
0318	121	131	21	24.7	1.08264	22.85
0319	171	196	26	27.9	1.1462	26.95
0320	103	152	23.8	24.8	1.47573	24.3
0321	102	152	29.7	28.4	1.4902	29.05
0322	149	197	25.8	29.6	1.32215	27.7
0323	179	215	25.2	28.1	1.20112	26.65
0324	161	204	29.9	31.4	1.26708	30.65
0325	131	158	22.1	25.1	1.20611	23.6
0326	190	230	26.3	29.6	1.21053	27.95
0327	129	175	25.1	26.1	1.35659	25.6
0328	177	263	25.1	26.1	1.48588	25.6
0329	146	214	17.1	17.8	1.46575	17.45
0330	134	175	15.8	19.8	1.30597	17.8
0331	187	157	33.2	31.8	0.839572	32.5
0332	156	181	29.2	30.5	1.16026	29.85
0333	213	209	21.7	23.8	0.981221	22.75
0334	208	223	21.9	24	1.07212	22.95
0335	164	183	25.7	27	1.11585	26.35
0336	157	185	26.3	23.8	1.17834	25.05
0337	167	203	26.8	28.2	1.21557	27.5
0338	150	143	26	21.7	0.953333	23.85
0339	151	192	27.2	31.4	1.27152	29.3
0340	131	157	27.4	28.1	1.19847	27.75
0341	90	100	25.6	29.2	1.11111	27.4
0342	162	175	24	22.3	1.08025	23.15
0343	162	201	26	25.9	1.24074	25.95
0344	142	189	32.9	35.5	1.33099	34.2
0345	182	195	33.5	30.8	1.07143	32.15
0346	170	229	23.6	29.8	1.34706	26.7
0347	146	233	23.6	23.1	1.59589	23.35
0348	141	170	23.2	25.5	1.20567	24.35
0349	77	91	26.1	26.5	1.18182	26.3
0350	197	239	28.1	29	1.2132	28.55
0351	145	162	25.2	26.7	1.11724	25.95
0352	168	212	22.4	24.3	1.2619	23.35
0353	186	197	25.7	25.7	1.05914	25.7
0354	144	162	25.11	24.7	1.125	24.905
0355	151	161	25.6	23.3	1.06623	24.45
0356	203	231	23.8	25.5	1.13793	24.65
0357	192	196	22.1	24.8	1.02083	23.45
0358	84	92	23	26.5	1.09524	24.75
0359	196	207	24.5	28.2	1.05612	26.35
0360	88	118	25.2	23.5	1.34091	24.35
0361	111	135	21.8	24.6	1.21622	23.2
0362	108	128	22.3	24.2	1.18519	23.25
0363	206	269	25.9	28.6	1.30583	27.25
0364	113	127	21.9	21.6	1.12389	21.75
0365	140	178	21.3	26.7	1.27143	24
0366	203	228	22.4	24.5	1.12315	23.45
0367	139	151	29.9	26.5	1.08633	28.2
0368	121	193	24.9	27.8	1.59504	26.35
0369	155	159	27.2	29.2	1.02581	28.2
0370	156	183	26.7	27.9	1.17308	27.3
0371	174	203	15.4	19.2	1.16667	17.3
0372	136	126	27	29	0.926471	28
0374	175	224	29.8	30.4	1.28	30.1
0375	147	166	24.8	28.9	1.12925	26.85
0376	127	155	25.2	27.6	1.22047	26.4
0377	139	183	24.5	28.1	1.31655	26.3
0378	146	176	21.1	21.7	1.20548	21.4
0379	185	209	25.7	26.2	1.12973	25.95
0380	166	240	26.7	31.7	1.44578	29.2
0381	190	212	25.6	26.3	1.11579	25.95
0382	168	231	29	28.6	1.375	28.8
0383	176	204	21.3	23.8	1.15909	22.55
0384	157	196	27.2	27.8	1.24841	27.5
0385	117	165	28	27.7	1.41026	27.85
0386	209	220	26.7	26.9	1.05263	26.8
0387	181	234	23.6	24.1	1.29282	23.85
0388	90	99	23.7	24.2	1.1	23.95
0389	160	200	27	26.3	1.25	26.65
0390	145	187	26	27.3	1.28966	26.65
0391	135	151	25.6	26.5	1.11852	26.05
0392	142	209	29.1	31.5	1.47183	30.3
0393	192	254	25.1	24.9	1.32292	25
0394	126	142	23.9	26.2	1.12698	25.05
0395	186	208	28	28.7	1.11828	28.35
0396	125	172	29.1	27.6	1.376	28.35
0397	118	177	21.8	24.7	1.5	23.25
0398	137	170	24.1	24.9	1.24088	24.5
0399	140	179	18	21.5	1.27857	19.75
0400	144	203	18.4	19.5	1.40972	18.95
0401	157	198	26.7	27.9	1.26115	27.3
0402	141	171	29.2	30.9	1.21277	30.05
0403	101	125	28.3	32.4	1.23762	30.35
0404	148	185	34.8	36	1.25	35.4
0405	164	199	25.1	29.6	1.21341	27.35
0406	124	170	23.9	27.5	1.37097	25.7
0407	178	211	24.9	26.2	1.18539	25.55
0408	104	111	26.5	27.1	1.06731	26.8
0410	143	145	27.5	27.7	1.01399	27.6
0411	195	252	24.9	26.5	1.29231	25.7
0412	154	150	31.3	29.1	0.974026	30.2
0413	106	128	26.5	26.8	1.20755	26.65
0414	166	208	27.5	27.3	1.25301	27.4
0415	142	203	28.5	28.7	1.42958	28.6
0416	122	147	24.2	25.7	1.20492	24.95
0417	155	156	23.6	27.6	1.00645	25.6
0418	148	174	22	27.4	1.17568	24.7
0419	113	135	26	24.7	1.19469	25.35
0420	173	189	23.5	23.2	1.09249	23.35
0421	109	130	25.2	28.7	1.19266	26.95
0422	170	233	28.4	27.6	1.37059	28
0423	206	244	20.8	20.2	1.18447	20.5
0424	183	227	27.8	28.1	1.24044	27.95
0425	144	184	30.6	29.6	1.27778	30.1
0427	166	228	24.4	24.9	1.37349	24.65
0428	139	189	22	23.2	1.35971	22.6
0429	146	211	25.1	24	1.44521	24.55
0430	153	189	25.7	26	1.23529	25.85
0431	55	75	28.7	28.7	1.36364	28.7
0432	185	214	20.4	21.5	1.15676	20.95
0433	150	181	28.2	30.1	1.20667	29.15
0434	141	203	24.8	26.5	1.43972	25.65
0435	170	238	22.5	21.9	1.4	22.2
0436	149	158	28.3	31.2	1.0604	29.75
0437	128	168	31.8	33.6	1.3125	32.7
0438	192	221	29.9	27.2	1.15104	28.55
0439	123	160	26.5	25	1.30081	25.75
0441	161	205	27.3	30.4	1.27329	28.85
0442	166	222	24	28.6	1.33735	26.3
0443	92	99	21.9	24.3	1.07609	23.1
0444	141	173	31.3	30.3	1.22695	30.8
0445	156	179	21.2	21.8	1.14744	21.5
0446	152	165	19.5	20.6	1.08553	20.05
0447	132	160	26.7	29.1	1.21212	27.9
0448	180	224	22.1	26.7	1.24444	24.4
0449	161	228	26.3	23.9	1.41615	25.1
0450	200	273	28.7	29.5	1.365	29.1
0451	127	132	27.1	29.8	1.03937	28.45
0452	189	242	27.8	30.3	1.28042	29.05
0453	119	152	27.4	27.4	1.27731	27.4
0454	116	141	22	24.3	1.21552	23.15
0455	164	232	26	25.9	1.41463	25.95
0456	151	163	24.4	27.8	1.07947	26.1
0457	125	172	28	29.1	1.376	28.55
0458	162	188	27.3	29.2	1.16049	28.25
0459	180	210	22.9	21.8	1.16667	22.35
0460	147	169	27.9	28.2	1.14966	28.05
0461	167	211	23.7	25.2	1.26347	24.45
0462	164	195	25.9	23	1.18902	24.45
0463	156	193	25.6	25.5	1.23718	25.55
0464	173	195	26.9	26.9	1.12717	26.9
0465	147	163	21.8	25.1	1.10884	23.45
0466	190	241	25.2	26.7	1.26842	25.95
0467	134	215	31.5	28.9	1.60448	30.2
0468	155	142	23.2	21.9	0.916129	22.55
0469	135	157	22.1	22.6	1.16296	22.35
0470	166	210	29.5	29.8	1.26506	29.65
0471	246	281	27.9	26.2	1.14228	27.05
0472	177	223	27.2	28.7	1.25989	27.95
0473	109	153	31.4	32.1	1.40367	31.75
0474	156	160	24.7	25.6	1.02564	25.15
0475	166	184	24.1	26.9	1.10843	25.5
0476	232	314	27.6	29.2	1.35345	28.4
0477	162	198	21.5	23	1.22222	22.25
0478	150	183	25.1	24	1.22	24.55
0479	158	205	27	27.6	1.29747	27.3
0480	147	212	24.6	25.7	1.44218	25.15
0481	196	204	22.4	25.7	1.04082	24.05
0482	161	216	24.9	27.7	1.34161	26.3
0483	157	173	24.4	28.1	1.10191	26.25
0484	168	233	25.2	28.7	1.3869	26.95
0485	179	185	26	28	1.03352	27
0486	144	180	27.6	27.9	1.25	27.75
0487	197	241	23.6	25.8	1.22335	24.7
0488	151	212	21	19.8	1.40397	20.4
0489	183	242	29	27	1.3224	28
0490	182	235	26.3	27.2	1.29121	26.75
0491	131	166	20.3	22.7	1.26718	21.5
0492	100	120	22.8	24.5	1.2	23.65
0493	125	159	21.7	22.2	1.272	21.95
0494	182	246	24.2	26.7	1.35165	25.45
0495	122	123	26.8	26.2	1.0082	26.5
0496	210	260	23.2	27.6	1.2381	25.4
0497	230	287	27.3	37.7	1.24783	32.5
0498	107	138	28.4	29.6	1.28972	29
0499	80	90	29.3	25	1.125	27.15
0500	77	98	25.7	28.1	1.27273	26.9
0501	175	223	24.7	26.1	1.27429	25.4
0502	168	209	25.8	25.5	1.24405	25.65
0503	188	174	29.6	28.8	0.925532	29.2
0504	132	149	26	22.8	1.12879	24.4
0505	216	212	20.8	20.8	0.981481	20.8
0506	162	210	30	32.1	1.2963	31.05
0507	80	97	31.9	28.7	1.2125	30.3
0508	79	96	25.4	24.2	1.21519	24.8
0509	144	226	26.3	27.5	1.56944	26.9
0510	171	234	28.7	27.2	1.36842	27.95
0511	141	170	21.4	23.8	1.20567	22.6
0512	156	175	24.6	26.1	1.12179	25.35
0513	160	186	31	31.9	1.1625	31.45
0514	141	195	24.8	25	1.38298	24.9
0515	194	246	27	24.7	1.26804	25.85
0516	106	127	33.4	32.3	1.19811	32.85
0517	203	247	23	24.8	1.21675	23.9
0518	231	251	22	25.1	1.08658	23.55
0519	116	146	21.2	24	1.25862	22.6
0520	130	212	31	32.1	1.63077	31.55
0521	118	173	27.8	26.8	1.4661	27.3
0522	78	98	21.9	21.2	1.25641	21.55
0523	207	276	21.5	22.7	1.33333	22.1
0524	123	122	27.3	26.5	0.99187	26.9
0525	144	187	19.1	18.1	1.29861	18.6
0526	190	256	27.5	26.8	1.34737	27.15
0527	135	165	20.4	22.4	1.22222	21.4
0528	127	124	17.4	21.1	0.976378	19.25
0529	127	188	26.5	27.4	1.48031	26.95
0530	157	211	25.4	24.1	1.34395	24.75
0531	165	212	26.2	25	1.28485	25.6
0532	197	210	29.4	28.5	1.06599	28.95
0533	198	258	21.4	23.8	1.30303	22.6
0534	164	223	25.7	26.9	1.35976	26.3
0535	116	164	29	26.5	1.41379	27.75
0536	138	197	23.7	24.7	1.42754	24.2
0537	145	158	21.1	24.8	1.08966	22.95
0538	136	169	25.9	27.4	1.24265	26.65
0539	141	179	23.8	25.2	1.2695	24.5
0540	151	176	23.6	25.1	1.16556	24.35
0541	121	157	30.7	32.7	1.29752	31.7
0542	132	175	24.9	27.5	1.32576	26.2
0543	180	213	23.4	26.1	1.18333	24.75
0544	107	137	26.5	27.8	1.28037	27.15
0545	158	172	23.5	26.3	1.08861	24.9
0546	129	123	21.5	21.4	0.953488	21.45
0547	111	123	20.8	21.8	1.10811	21.3
0548	186	221	22.6	22.9	1.18817	22.75
0549	155	178	30.3	30.6	1.14839	30.45
0550	140	173	24.4	23.7	1.23571	24.05
0552	101	142	15.7	18.4	1.40594	17.05
0553	153	207	18.9	21.3	1.35294	20.1
0554	91	119	28.2	29.7	1.30769	28.95
0555	186	236	23	23.8	1.26882	23.4
0556	142	190	30.1	28.4	1.33803	29.25
0557	170	208	29	27.3	1.22353	28.15
0558	197	289	15.3	16.7	1.46701	16
0559	152	130	26.7	27.6	0.855263	27.15
0560	146	186	29.4	31.3	1.27397	30.35
0561	202	265	31.7	29.5	1.31188	30.6
0562	91	114	26.5	27.8	1.25275	27.15
0563	134	143	23.7	22.4	1.06716	23.05
0564	170	178	25.1	26.1	1.04706	25.6
0565	117	147	20.8	21.8	1.25641	21.3
0566	125	130	26.1	25.1	1.04	25.6
0567	163	227	23	23	1.39264	23
0568	100	110	24.7	24.5	1.1	24.6
0569	114	140	22.5	21.7	1.22807	22.1
0570	162	199	23	26.1	1.2284	24.55
0571	121	155	30	33.8	1.28099	31.9
0572	172	196	29.7	32.2	1.13953	30.95
0573	160	205	26.5	28.8	1.28125	27.65
0574	148	179	26.5	27.7	1.20946	27.1
0575	103	140	22.4	23.6	1.35922	23
0576	143	163	26.3	29.7	1.13986	28
0577	116	137	25.3	27	1.18103	26.15
0578	178	222	26	25.3	1.24719	25.65
0579	172	209	26.1	27.5	1.21512	26.8
0580	148	181	22.1	23.4	1.22297	22.75
0581	146	185	27.6	26.5	1.26712	27.05
0582	129	183	29.1	26.9	1.4186	28
0583	136	150	20.9	23.6	1.10294	22.25
0584	141	177	25.4	24	1.25532	24.7
0585	180	252	24.6	25.7	1.4	25.15
0586	205	284	24.7	25.9	1.38537	25.3
0587	176	216	21.6	22.4	1.22727	22
0588	128	156	27	26.5	1.21875	26.75
0589	111	135	27.1	26.2	1.21622	26.65
0591	152	185	22.5	24.6	1.21711	23.55
0592	95	94	25.8	24.7	0.989474	25.25
0593	224	284	22.2	24	1.26786	23.1
0594	135	181	25.3	26.8	1.34074	26.05
0595	152	182	23.6	26.7	1.19737	25.15
0596	140	170	23.5	25.6	1.21429	24.55
0597	197	269	27	29.2	1.36548	28.1
0598	49	62	26.5	26.5	1.26531	26.5
0599	115	152	23.3	25.3	1.32174	24.3
0600	170	220	30.2	30.8	1.29412	30.5
0601	160	206	27.2	23.7	1.2875	25.45
0602	168	198	30.3	28.7	1.17857	29.5
0603	126	151	29.1	26.8	1.19841	27.95
0604	123	139	21.5	24	1.13008	22.75
0605	118	139	24.5	26.3	1.17797	25.4
0606	114	135	30.5	28.6	1.18421	29.55
0607	130	168	25.8	26.3	1.29231	26.05
0608	149	162	24.4	24.8	1.08725	24.6
0609	208	275	25.8	26.4	1.32212	26.1
0610	183	202	23.1	26.1	1.10383	24.6
0611	122	170	26	26.3	1.39344	26.15
0612	176	175	24.2	23.9	0.994318	24.05
0613	199	259	24	28	1.30151	26
0614	160	218	29	30	1.3625	29.5
0615	176	224	24.9	25.8	1.27273	25.35
0616	184	236	24.4	28.6	1.28261	26.5
0617	160	195	28	28.7	1.21875	28.35
0618	132	168	24.9	24.2	1.27273	24.55
0619	168	183	23.7	23.7	1.08929	23.7
0620	137	188	17.9	20.8	1.37226	19.35
0621	94	130	28.1	28.9	1.38298	28.5
0622	133	150	24.4	21.9	1.12782	23.15
0623	125	147	19.9	19.8	1.176	19.85
0624	151	249	26	25.5	1.64901	25.75
0625	140	163	25	25.3	1.16429	25.15
0626	160	190	26.3	26.9	1.1875	26.6
0627	107	147	29.5	29.3	1.37383	29.4
0628	129	137	21.2	19.8	1.06202	20.5
0629	138	189	26.2	28.3	1.36957	27.25
0630	79	94	23.5	26.5	1.18987	25
0631	149	185	30.1	31.2	1.24161	30.65
0632	154	178	25.4	27.6	1.15584	26.5
0633	174	172	30.3	27.8	0.988506	29.05
0634	145	170	27.8	26.9	1.17241	27.35
0635	158	201	25.2	25.3	1.27215	25.25
0636	110	144	27.2	26.5	1.30909	26.85
0637	103	136	31.8	33.1	1.32039	32.45
0638	144	160	25	28.1	1.11111	26.55
0639	136	166	25	26.9	1.22059	25.95
0640	176	270	27.4	25.7	1.53409	26.55
0641	176	188	27.2	27.2	1.06818	27.2
0642	158	193	28.9	24.5	1.22152	26.7
0643	159	194	29.7	27.9	1.22013	28.8
0644	163	206	24.4	25.5	1.2638	24.95
0645	186	200	26.1	23	1.07527	24.55
0646	110	113	25.1	25.4	1.02727	25.25
0647	154	219	28.5	27.3	1.42208	27.9
0648	153	176	18	19.7	1.15033	18.85
0649	147	193	22.6	24.7	1.31293	23.65
0650	155	179	34.8	37.4	1.15484	36.1
0651	133	193	24.5	24.8	1.45113	24.65
0652	126	153	25.7	21.3	1.21429	23.5
0653	164	230	24.3	25.9	1.40244	25.1
0654	163	237	25.9	27.8	1.45399	26.85
0655	132	194	20.9	23.2	1.4697	22.05
0656	98	115	29.4	28.6	1.17347	29
0657	159	193	31.3	28.3	1.21384	29.8
0658	159	186	27.9	25.5	1.16981	26.7
0659	192	231	24.6	25.3	1.20312	24.95
0660	162	238	22.8	21.2	1.46914	22
0661	166	211	25.5	28	1.27108	26.75
0662	170	181	27.2	28	1.06471	27.6
0663	169	218	25.7	28	1.28994	26.85
0664	105	146	20.6	24.7	1.39048	22.65
0665	133	181	26.1	26.7	1.3609	26.4
0666	150	180	25.4	26.5	1.2	25.95
0667	135	191	22.4	24.5	1.41481	23.45
0668	167	193	23.3	21.6	1.15569	22.45
0669	174	226	33.6	33.1	1.29885	33.35
0670	160	189	28.7	29.3	1.18125	29
0671	59	55	26.5	24.6	0.932203	25.55
0672	128	160	19.3	20.4	1.25	19.85
0673	135	149	22.4	24.1	1.1037	23.25
0674	146	190	26.5	24.9	1.30137	25.7
0675	75	87	35	34.1	1.16	34.55
0676	87	115	26.5	26.8	1.32184	26.65
0677	181	205	20.4	19.4	1.1326	19.9
0678	162	186	26.1	24.6	1.14815	25.35
0679	142	184	27.9	28.8	1.29577	28.35
0680	152	173	24.5	26.1	1.13816	25.3
0681	144	173	26.5	29.2	1.20139	27.85
0682	170	189	27.8	26	1.11176	26.9
0683	110	167	22.2	23.3	1.51818	22.75
0684	163	236	26.4	25.4	1.44785	25.9
0685	166	190	22.9	23.9	1.14458	23.4
0686	142	162	21.9	22.8	1.14085	22.35
0687	130	168	27	29.3	1.29231	28.15
0688	172	182	27.8	28	1.05814	27.9
0689	169	199	26.7	24.5	1.17751	25.6
0690	118	130	29.4	31.6	1.10169	30.5
0691	133	142	28.1	26.9	1.06767	27.5
0692	173	238	27.3	26.5	1.37572	26.9
0693	151	174	20.9	19.6	1.15232	20.25
0694	115	148	18.9	21.9	1.28696	20.4
0695	110	111	28.2	28.1	1.00909	28.15
0696	73	88	32	31	1.20548	31.5
0697	155	201	30.3	28.3	1.29677	29.3
0698	178	191	30	29.1	1.07303	29.55
0699	156	193	25.3	27.8	1.23718	26.55
0700	114	153	30.7	28.9	1.34211	29.8
0701	91	130	26	28.9	1.42857	27.45
0702	170	222	29.1	28	1.30588	28.55
0703	160	210	24.3	25.8	1.3125	25.05
0704	205	232	29.1	29.3	1.13171	29.2
0705	83	100	22.5	25.2	1.20482	23.85
0706	95	112	23.7	25.8	1.17895	24.75
0707	155	181	27.2	25	1.16774	26.1
0708	153	207	26.7	26.7	1.35294	26.7
0709	139	156	28.7	31.7	1.1223	30.2
0710	165	176	25.3	23.7	1.06667	24.5
0711	133	181	31.2	30.1	1.3609	30.65
0712	149	154	24.5	22.4	1.03356	23.45
0713	175	222	25.8	24.9	1.26857	25.35
0714	146	187	26.7	26.5	1.28082	26.6
0715	166	174	22.8	24.6	1.04819	23.7
0716	200	203	24	25.3	1.015	24.65
0717	128	176	23.4	23.9	1.375	23.65
0718	144	181	26.7	22.9	1.25694	24.8
0719	86	95	22.1	26.1	1.10465	24.1
0720	103	107	26.2	26.5	1.03883	26.35
0721	159	225	25.2	27.2	1.41509	26.2
0722	139	165	20.9	23.6	1.18705	22.25
0723	162	184	27.8	30.5	1.1358	29.15
0724	144	196	26.1	29.5	1.36111	27.8
0725	171	223	24.2	28.5	1.30409	26.35
0726	102	136	23.4	27.3	1.33333	25.35
0727	128	131	27.9	27.3	1.02344	27.6
0728	158	198	29	27.1	1.25316	28.05
0729	113	137	27.2	25.3	1.21239	26.25
0730	107	157	27.5	27.8	1.46729	27.65
0731	134	162	23.2	25.6	1.20896	24.4
0732	185	213	28	26	1.15135	27
0733	123	143	24.8	27	1.1626	25.9
0734	135	150	26.5	25.2	1.11111	25.85
0735	113	139	24.9	26	1.23009	25.45
0736	99	126	31.1	30.2	1.27273	30.65
0737	193	232	24.6	26.2	1.20207	25.4
0738	138	178	25.6	24	1.28986	24.8
0739	164	225	25.8	24	1.37195	24.9
0740	136	168	30.3	30	1.23529	30.15
0741	131	178	25.7	25.2	1.35878	25.45
0742	122	154	21.5	20	1.2623	20.75
0743	159	191	24.2	22.1	1.20126	23.15
0744	123	144	20.2	24.7	1.17073	22.45
0745	95	106	28.9	28.7	1.11579	28.8
0746	177	210	29.8	26.9	1.18644	28.35
0747	170	234	28	29.4	1.37647	28.7
0748	141	179	23.9	21.8	1.2695	22.85
0749	155	164	26.3	25.6	1.05806	25.95
0750	115	136	24.9	23.1	1.18261	24
0751	133	145	24	21.7	1.09023	22.85
0752	124	128	22.7	24.9	1.03226	23.8
0753	93	104	28.8	27.2	1.11828	28
0754	129	186	32.6	32.8	1.44186	32.7
0755	127	142	23.4	24.1	1.11811	23.75
0756	142	166	25.6	23.8	1.16901	24.7
0757	164	197	25.8	28	1.20122	26.9
0758	233	250	29.7	27	1.07296	28.35
0759	135	151	21.7	24.3	1.11852	23
0760	131	188	25.6	27	1.43511	26.3
0761	155	209	30.5	30.5	1.34839	30.5
0762	157	176	22.6	20.1	1.12102	21.35
0763	102	113	24.9	23.8	1.10784	24.35
0764	148	188	21	22	1.27027	21.5
0765	185	186	26.9	27.3	1.00541	27.1
0766	155	187	27.7	24.5	1.20645	26.1
0767	149	170	23.1	25	1.14094	24.05
2124	342	398	29	31.6	1.16374	30.3

## Sheet: Study1_purebreds
ID	Breed	A（pixel）	B（pixel）	C（Angle)	D（Angle)	B/A	(C+D)/2
0768	Abyssinian	109	152	25.1	26.8	1.3945	25.95
0769	Abyssinian	154	184	22.6	24.3	1.19481	23.45
0770	Abyssinian	104	128	26.8	28.9	1.23077	27.85
0771	Abyssinian	115	126	24.1	24	1.09565	24.05
0772	Abyssinian	114	142	23.9	26.3	1.24561	25.1
0773	Abyssinian	19	18	17.3	18.4	0.947368	17.85
0774	Abyssinian	17	16	17.3	18.4	0.941176	17.85
0775	Abyssinian	40	42	21.8	22.7	1.05	22.25
0776	Abyssinian	18	16	19.6	21	0.888889	20.3
0777	Abyssinian	42	40	23.1	21.1	0.952381	22.1
0778	Abyssinian	23	24	22.3	22.8	1.04348	22.55
0779	Abyssinian	18	17	23.1	21	0.944444	22.05
0780	Abyssinian	21	20	28.3	28.3	0.952381	28.3
0781	Abyssinian	24	26	22.3	23.6	1.08333	22.95
0782	Abyssinian	23	21	28	26.5	0.913043	27.25
0783	Abyssinian	17	18	28.3	25	1.05882	26.65
0784	Abyssinian	19	19	28	28	1	28
0785	Abyssinian	17	16	25	26.5	0.941176	25.75
0786	Abyssinian	39	39	27.9	24.3	1	26.1
0787	Abyssinian	21	20	28.3	25	0.952381	26.65
0788	Abyssinian	43	35	19.8	17.8	0.813953	18.8
0789	Abyssinian	43	42	20.5	20.5	0.976744	20.5
0790	Abyssinian	17	15	24.7	24.7	0.882353	24.7
0791	Abyssinian	19	16	16.3	18.4	0.842105	17.35
0792	Abyssinian	37	38	28.3	29	1.02703	28.65
0793	Abyssinian	21	19	28	28.3	0.904762	28.15
0794	Abyssinian	20	18	23.1	21.8	0.9	22.45
0795	Abyssinian	31	28	25.5	25.5	0.903226	25.5
0796	Abyssinian	46	44	27.3	24.3	0.956522	25.8
0797	Abyssinian	18	19	25	21.8	1.05556	23.4
0798	Abyssinian	18	15	22.3	21.8	0.833333	22.05
0799	Abyssinian	18	15	21	21	0.833333	21
0800	Abyssinian	38	41	24.3	22.4	1.07895	23.35
0801	Abyssinian	16	18	25	26.5	1.125	25.75
0802	Abyssinian	18	14	21	18.4	0.777778	19.7
0803	Abyssinian	18	20	21.8	24.7	1.11111	23.25
0804	Abyssinian	20	20	22.3	23.1	1	22.7
0805	Abyssinian	31	32	28.8	26.5	1.03226	27.65
0806	Abyssinian	27	32	31.4	27.7	1.18519	29.55
0807	Abyssinian	42	36	15.5	18.4	0.857143	16.95
0808	Abyssinian	18	16	26.5	28.3	0.888889	27.4
0809	Abyssinian	55	59	25.4	27.1	1.07273	26.25
0810	Abyssinian	18	20	22.3	23.1	1.11111	22.7
0811	Abyssinian	16	16	23.1	24.7	1	23.9
0812	Abyssinian	27	23	21.8	18.4	0.851852	20.1
0813	Abyssinian	21	21	28	27.8	1	27.9
0814	Abyssinian	34	34	27.4	25.7	1	26.55
0815	Abyssinian	19	18	23.6	23.1	0.947368	23.35
0816	Abyssinian	19	18	29.7	26.5	0.947368	28.1
0817	Abyssinian	25	23	25.4	25.3	0.92	25.35
201	American Bobtail	24	27	26.5	27.8	1.125	27.15
202	American Bobtail	36	45	28.3	27.5	1.25	27.9
203	American Bobtail	25	28	26.5	25.3	1.12	25.9
204	American Bobtail	31	32	27.6	26.5	1.03226	27.05
205	American Bobtail	43	46	23.1	22.7	1.06977	22.9
206	American Bobtail	29	36	29.2	27.4	1.24138	28.3
207	American Bobtail	22	33	24.3	23.9	1.5	24.1
208	American Bobtail	22	20	23.6	25	0.909091	24.3
209	American Bobtail	22	28	28.8	26.5	1.27273	27.65
210	American Bobtail	21	22	22.6	23.6	1.04762	23.1
211	American Bobtail	24	25	21.8	25	1.04167	23.4
212	American Bobtail	15	21	22.6	21	1.4	21.8
213	American Bobtail	22	31	25.2	25.2	1.40909	25.2
214	American Bobtail	103	136	28.7	26.8	1.32039	27.75
215	American Bobtail	40	49	23.4	20.7	1.225	22.05
216	American Bobtail	16	20	25	25	1.25	25
217	American Bobtail	20	23	23.1	21.8	1.15	22.45
218	American Bobtail	32	29	23.9	23.7	0.90625	23.8
219	American Bobtail	32	36	22.9	23.7	1.125	23.3
220	American Bobtail	15	21	31.6	28.3	1.4	29.95
221	American Bobtail	28	34	22.1	21.3	1.21429	21.7
222	American Bobtail	25	31	19.9	17.5	1.24	18.7
223	American Bobtail	24	21	19.4	19.4	0.875	19.4
224	American Bobtail	49	69	26	26.5	1.40816	26.25
225	American Bobtail	64	96	24.1	26.5	1.5	25.3
226	American Bobtail	18	20	29.7	28	1.11111	28.85
227	American Bobtail	15	15	28.6	24.4	1	26.5
228	American Bobtail	23	34	30.4	28.8	1.47826	29.6
229	American Bobtail	31	38	21.8	20.3	1.22581	21.05
230	American Bobtail	20	23	25	23.6	1.15	24.3
231	American Bobtail	52	55	19.2	21.5	1.05769	20.35
232	American Bobtail	23	30	20.8	21.8	1.30435	21.3
233	American Bobtail	20	24	23.9	23.9	1.2	23.9
234	American Bobtail	38	53	20.5	20.7	1.39474	20.6
235	American Bobtail	23	24	26.5	25.2	1.04348	25.85
236	American Bobtail	28	39	26.5	24.6	1.39286	25.55
237	American Bobtail	11	13	29	21.8	1.18182	25.4
238	American Bobtail	66	64	21.8	20.8	0.969697	21.3
239	American Bobtail	23	30	26.5	23.9	1.30435	25.2
240	American Bobtail	39	54	28.7	29.3	1.38462	29
241	American Bobtail	44	72	32.3	27.5	1.63636	29.9
242	American Bobtail	57	63	26.5	24.1	1.10526	25.3
243	American Bobtail	118	142	28.1	32.7	1.20339	30.4
244	American Bobtail	58	78	28.6	27	1.34483	27.8
245	American Bobtail	51	56	22.8	21.3	1.09804	22.05
246	American Bobtail	47	59	25.2	23.3	1.25532	24.25
247	American Bobtail	86	103	22.8	23	1.19767	22.9
248	American Bobtail	116	177	30.6	28.6	1.52586	29.6
249	American Bobtail	110	110	23	22.2	1	22.6
250	American Bobtail	104	113	25.2	26.5	1.08654	25.85
251	American Curl	134	131	19.9	22.31	0.977612	21.105
252	American Curl	132	146	28.1	31.9	1.10606	30
253	American Curl	116	139	27.2	24.9	1.19828	26.05
254	American Curl	137	142	25	23.3	1.0365	24.15
255	American Curl	19	21	22.3	22.8	1.10526	22.55
256	American Curl	26	36	22.2	20.8	1.38462	21.5
257	American Curl	19	25	28	25	1.31579	26.5
258	American Curl	20	18	21.8	19.6	0.9	20.7
259	American Curl	17	18	26.5	23.1	1.05882	24.8
260	American Curl	18	23	17.3	21	1.27778	19.15
261	American Curl	20	20	23.1	23.1	1	23.1
262	American Curl	28	33	19.9	18.4	1.17857	19.15
263	American Curl	19	23	21.8	21.8	1.21053	21.8
264	American Curl	21	23	24.7	24.7	1.09524	24.7
265	American Curl	16	20	21	18.4	1.25	19.7
266	American Curl	17	23	23.1	24.7	1.35294	23.9
267	American Curl	39	39	23.8	25.1	1	24.45
268	American Curl	22	24	23.6	23.6	1.09091	23.6
269	American Curl	93	122	29.5	28.2	1.31183	28.85
270	American Curl	18	20	25	21.8	1.11111	23.4
271	American Curl	38	52	22.4	20.5	1.36842	21.45
272	American Curl	59	76	19.1	17.1	1.28814	18.1
273	American Curl	30	40	21.3	24.2	1.33333	22.75
274	American Curl	16	18	21	17.1	1.125	19.05
275	American Curl	27	34	24.2	23.1	1.25926	23.65
276	American Curl	28	41	26.5	25.7	1.46429	26.1
277	American Curl	37	52	25.8	27.3	1.40541	26.55
278	American Curl	34	42	25	26.5	1.23529	25.75
279	American Curl	64	83	21.4	19.2	1.29688	20.3
280	American Curl	39	39	23.1	22.4	1	22.75
281	American Curl	110	139	23.4	29.2	1.26364	26.3
282	American Curl	46	65	23.4	23.1	1.41304	23.25
283	American Curl	28	34	22.2	19.1	1.21429	20.65
284	American Curl	33	44	22.1	21.8	1.33333	21.95
285	American Curl	42	42	17.3	17.8	1	17.55
286	American Curl	47	61	24.8	24.3	1.29787	24.55
287	American Curl	64	73	29.2	29.7	1.14062	29.45
288	American Curl	42	53	19.5	21.4	1.2619	20.45
289	American Curl	21	28	26.5	23.6	1.33333	25.05
290	American Curl	45	52	25.7	23.9	1.15556	24.8
291	American Curl	27	40	22.6	21.3	1.48148	21.95
292	American Curl	23	27	31.4	27.8	1.17391	29.6
293	American Curl	106	146	26	27.6	1.37736	26.8
294	American Curl	32	37	23.7	20.7	1.15625	22.2
295	American Curl	19	21	26.5	25	1.10526	25.75
296	American Curl	40	58	27.2	25.2	1.45	26.2
297	American Curl	61	71	26	23.6	1.16393	24.8
298	American Curl	16	22	28.3	28.3	1.375	28.3
299	American Curl	120	147	22.2	21.9	1.225	22.05
300	American Curl	61	73	23.7	25.5	1.19672	24.6
301	American Shorthair	247	216	24.5	25.6	0.874494	25.05
302	American Shorthair	211	223	28.6	26.8	1.05687	27.7
303	American Shorthair	428	449	27.2	27.7	1.04907	27.45
304	American Shorthair	300	316	26.7	24.9	1.05333	25.8
305	American Shorthair	157	141	29.3	27.1	0.898089	28.2
306	American Shorthair	155	154	27.9	27.2	0.993548	27.55
307	American Shorthair	144	149	28.9	28.1	1.03472	28.5
308	American Shorthair	68	72	28.2	26.9	1.05882	27.55
309	American Shorthair	137	156	27.4	25.4	1.13869	26.4
310	American Shorthair	201	184	28.2	27.7	0.915423	27.95
311	American Shorthair	151	144	25.3	25.8	0.953642	25.55
312	American Shorthair	202	202	28.8	23.9	1	26.35
313	American Shorthair	128	148	29.5	31.8	1.15625	30.65
314	American Shorthair	135	133	28.3	25.4	0.985185	26.85
315	American Shorthair	167	159	28.4	29.6	0.952096	29
316	American Shorthair	159	173	22.4	24.5	1.08805	23.45
317	American Shorthair	120	134	27.7	30.5	1.11667	29.1
318	American Shorthair	175	220	26.1	25	1.25714	25.55
319	American Shorthair	161	166	24.3	22.3	1.03106	23.3
320	American Shorthair	148	172	22.3	24	1.16216	23.15
321	American Shorthair	145	157	23.3	22.7	1.08276	23
322	American Shorthair	166	181	21.1	23.5	1.09036	22.3
323	American Shorthair	160	169	30.7	29.6	1.05625	30.15
324	American Shorthair	200	217	27.9	25.8	1.085	26.85
325	American Shorthair	77	83	24.6	25.8	1.07792	25.2
326	American Shorthair	124	125	22.8	25.5	1.00806	24.15
327	American Shorthair	166	175	23.4	23.5	1.05422	23.45
328	American Shorthair	134	139	26.1	26.1	1.03731	26.1
329	American Shorthair	164	149	27.2	24.5	0.908537	25.85
330	American Shorthair	109	98	27.5	25	0.899083	26.25
331	American Shorthair	21	17	21.2	21.2	0.809524	21.2
332	American Shorthair	20	15	22.3	20.5	0.75	21.4
333	American Shorthair	22	17	21.2	19.4	0.772727	20.3
334	American Shorthair	26	22	26.5	24.2	0.846154	25.35
335	American Shorthair	38	25	25.6	22.1	0.657895	23.85
336	American Shorthair	35	38	25	24.1	1.08571	24.55
337	American Shorthair	46	42	21.2	22.3	0.913043	21.75
338	American Shorthair	26	23	22.8	21.2	0.884615	22
339	American Shorthair	44	41	22.8	21.2	0.931818	22
340	American Shorthair	20	16	20.5	17.3	0.8	18.9
341	American Shorthair	28	26	26.5	22.2	0.928571	24.35
342	American Shorthair	38	35	22.4	20.7	0.921053	21.55
343	American Shorthair	25	23	21.8	23.1	0.92	22.45
344	American Shorthair	33	27	22.9	20.7	0.818182	21.8
345	American Shorthair	24	18	19.4	17.3	0.75	18.35
346	American Shorthair	26	25	22.2	24.4	0.961538	23.3
347	American Shorthair	24	20	22.2	22.8	0.833333	22.5
348	American Shorthair	25	21	20.8	22.3	0.84	21.55
349	American Shorthair	23	19	20.5	18.4	0.826087	19.45
350	American Shorthair	45	35	27.9	26.5	0.777778	27.2
351	American Wirehair	50	51	26	25	1.02	25.5
352	American Wirehair	28	25	23.1	25.2	0.892857	24.15
353	American Wirehair	20	17	19.6	19.6	0.85	19.6
354	American Wirehair	25	23	22.3	20.5	0.92	21.4
355	American Wirehair	21	18	18.4	19.6	0.857143	19
356	American Wirehair	22	16	19.4	20.5	0.727273	19.95
357	American Wirehair	20	17	18.4	18.4	0.85	18.4
358	American Wirehair	57	59	25.5	25	1.03509	25.25
359	American Wirehair	16	14	18.4	21	0.875	19.7
360	American Wirehair	24	17	20.5	19.6	0.708333	20.05
361	American Wirehair	26	23	21.2	20.2	0.884615	20.7
362	American Wirehair	27	23	20.2	17.5	0.851852	18.85
363	American Wirehair	19	18	25	25	0.947368	25
364	American Wirehair	25	20	23.9	21.2	0.8	22.55
365	American Wirehair	33	35	23.4	22.6	1.06061	23
366	American Wirehair	40	30	20.7	17.8	0.75	19.25
367	American Wirehair	32	29	22.9	24.7	0.90625	23.8
368	American Wirehair	27	20	18.4	18.4	0.740741	18.4
369	American Wirehair	38	32	24.3	21.5	0.842105	22.9
370	American Wirehair	25	25	25.3	23.9	1	24.6
371	American Wirehair	53	48	29.1	29.9	0.90566	29.5
372	American Wirehair	24	20	23.9	22.3	0.833333	23.1
373	American Wirehair	39	32	20.7	22.9	0.820513	21.8
374	American Wirehair	62	74	27	24.2	1.19355	25.6
375	American Wirehair	23	18	21.2	19.4	0.782609	20.3
376	American Wirehair	32	36	26.5	23.1	1.125	24.8
377	American Wirehair	42	39	27.9	26.5	0.928571	27.2
378	American Wirehair	24	19	21.2	22.3	0.791667	21.75
379	American Wirehair	29	31	19.2	21.2	1.06897	20.2
380	American Wirehair	261	217	21.4	21.3	0.831418	21.35
381	American Wirehair	158	111	25.1	25.9	0.702532	25.5
382	American Wirehair	39	30	24.7	23.9	0.769231	24.3
383	American Wirehair	26	20	23.9	23.1	0.769231	23.5
384	Australian Mist	29	36	22.6	25.6	1.24138	24.1
385	Australian Mist	64	66	24.4	21.6	1.03125	23
386	Australian Mist	34	48	25.2	23.4	1.41176	24.3
387	Australian Mist	17	20	22.3	20.5	1.17647	21.4
388	Australian Mist	38	50	23	22.3	1.31579	22.65
389	Australian Mist	20	23	18.4	21.8	1.15	20.1
390	Australian Mist	42	51	22	21.2	1.21429	21.6
391	Australian Mist	30	38	24.7	23.9	1.26667	24.3
392	Australian Mist	20	20	26.5	26.5	1	26.5
393	Australian Mist	52	58	22.3	21.5	1.11538	21.9
394	Australian Mist	49	54	25.3	24.5	1.10204	24.9
395	Australian Mist	32	42	24.1	24.9	1.3125	24.5
396	Australian Mist	45	57	26.5	25.4	1.26667	25.95
397	Australian Mist	17	25	19.4	18.4	1.47059	18.9
398	Australian Mist	28	29	26.5	15.3	1.03571	20.9
399	Australian Mist	24	30	28.6	24.6	1.25	26.6
400	Australian Mist	36	48	23.4	25.7	1.33333	24.55
401	Australian Mist	81	88	23.6	22.2	1.08642	22.9
402	Australian Mist	27	32	23.4	26.5	1.18519	24.95
403	Australian Mist	30	36	23.4	22.6	1.2	23
404	Balinese	17	24	20.5	21.8	1.41176	21.15
405	Balinese	12	18	26.5	26.5	1.5	26.5
406	Balinese	13	17	26.5	24.4	1.30769	25.45
407	Balinese	17	28	29.3	30.9	1.64706	30.1
408	Balinese	17	28	18.4	22.3	1.64706	20.35
409	Balinese	20	29	25.2	27.8	1.45	26.5
410	Balinese	16	22	15.9	14.9	1.375	15.4
411	Balinese	13	22	28.3	26.5	1.69231	27.4
412	Balinese	20	30	25.2	26.5	1.5	25.85
413	Balinese	22	37	20.2	20.2	1.68182	20.2
414	Balinese	19	31	23.6	21.8	1.63158	22.7
415	Balinese	31	59	22.6	21	1.90323	21.8
416	Balinese	14	26	26.5	24.7	1.85714	25.6
417	Balinese	16	27	30.9	26.5	1.6875	28.7
418	Balinese	18	25	18.4	19.6	1.38889	19
419	Balinese	13	23	29.7	30.2	1.76923	29.95
420	Balinese	28	40	21.8	22.2	1.42857	22
421	Balinese	30	48	29.4	27.4	1.6	28.4
422	Balinese	28	49	25.5	23.7	1.75	24.6
423	Balinese	19	34	29.3	26.5	1.78947	27.9
424	Balinese	31	42	21.8	17.7	1.35484	19.75
425	Balinese	14	22	26.5	26.5	1.57143	26.5
426	Balinese	32	47	27.4	26.5	1.46875	26.95
427	Balinese	49	77	21.2	19.4	1.57143	20.3
428	Balinese	65	104	28	30.8	1.6	29.4
429	Bengal	281	432	29.8	28.5	1.53737	29.15
430	Bengal	371	589	23.3	23.9	1.5876	23.6
431	Bengal	171	229	29.6	27.7	1.33918	28.65
432	Bengal	138	159	22.5	25.8	1.15217	24.15
433	Bengal	79	96	20.5	21.2	1.21519	20.85
434	Bengal	89	93	18.6	21.4	1.04494	20
435	Bengal	119	127	26.5	28.2	1.06723	27.35
436	Bengal	151	166	23.5	19	1.09934	21.25
437	Bengal	15	19	22.6	19.9	1.26667	21.25
438	Bengal	30	37	21.8	23.1	1.23333	22.45
439	Bengal	15	20	22.6	24.4	1.33333	23.5
440	Bengal	17	19	24.7	24.7	1.11765	24.7
441	Bengal	15	20	24.7	26.5	1.33333	25.6
442	Bengal	18	19	21	24.7	1.05556	22.85
443	Bengal	20	28	25	26.5	1.4	25.75
444	Bengal	35	43	28.4	24.1	1.22857	26.25
445	Bengal	119	153	24.1	24.8	1.28571	24.45
446	Bengal	32	43	22.6	24.6	1.34375	23.6
447	Bengal	20	24	23.1	21	1.2	22.05
448	Bengal	14	18	26.5	28.6	1.28571	27.55
449	Bengal	55	80	31.3	29.8	1.45455	30.55
450	Bengal	58	62	21.5	23.1	1.06897	22.3
451	Bengal	80	89	30.5	24.5	1.1125	27.5
452	Bengal	70	80	25.6	25.2	1.14286	25.4
453	Bengal	44	46	29	31.5	1.04545	30.25
454	Bengal	115	134	27.5	25.4	1.16522	26.45
455	Bengal	18	23	26.5	24.7	1.27778	25.6
456	Bengal	33	39	28.3	30.2	1.18182	29.25
457	Bengal	103	103	26.9	25.7	1	26.3
458	Bengal	46	58	25.2	26.5	1.26087	25.85
459	Bengal	198	267	29.2	28.8	1.34848	29
460	Bengal	186	240	30.5	26	1.29032	28.25
461	Bengal	71	87	32.8	29.3	1.22535	31.05
462	Bengal	20	26	29.7	26.5	1.3	28.1
463	Bengal	20	23	21.8	21.8	1.15	21.8
464	Bengal	18	22	26.5	26.5	1.22222	26.5
465	Bengal	211	264	31.2	29.2	1.25118	30.2
466	Bengal	37	50	26.5	25.2	1.35135	25.85
467	Bengal	67	80	28.2	27	1.19403	27.6
468	Bengal	30	37	17.7	19.1	1.23333	18.4
469	Bengal	79	98	24.2	24.3	1.24051	24.25
470	Bengal	26	31	23.4	25.4	1.19231	24.4
471	Bengal	17	19	22.3	23.1	1.11765	22.7
472	Bengal	34	46	25.8	22.4	1.35294	24.1
473	Bengal	39	49	19.5	21.1	1.25641	20.3
474	Bengal	38	47	25.8	23.9	1.23684	24.85
475	Bengal	59	69	28.8	24.7	1.16949	26.75
476	Bengal	36	39	21.8	21	1.08333	21.4
477	Bengal	43	54	24.1	25.8	1.25581	24.95
478	Bengal	68	100	26.1	23	1.47059	24.55
479	Birman	19	22	17.5	15.5	1.15789	16.5
480	Birman	36	37	15.9	17.2	1.02778	16.55
481	Birman	25	29	23.1	23.1	1.16	23.1
482	Birman	29	27	21.8	22.8	0.931034	22.3
483	Birman	26	30	15.9	14.7	1.15385	15.3
484	Birman	26	27	19.2	16.6	1.03846	17.9
485	Birman	21	23	17.5	14.7	1.09524	16.1
486	Birman	23	24	15.9	19.4	1.04348	17.65
487	Birman	33	35	18.4	19.7	1.06061	19.05
488	Birman	38	38	17.1	17.8	1	17.45
489	Birman	20	23	19.2	22.3	1.15	20.75
490	Birman	18	21	16.3	16.3	1.16667	16.3
491	Birman	29	32	19.1	18.4	1.10345	18.75
492	Birman	46	45	18.4	22.4	0.978261	20.4
493	Birman	30	37	22.2	23.4	1.23333	22.8
494	Birman	26	31	17.7	22.6	1.19231	20.15
495	Birman	24	22	24.2	20.8	0.916667	22.5
496	Birman	24	25	14	18.4	1.04167	16.2
497	Birman	32	39	21.4	21.8	1.21875	21.6
498	Birman	17	21	21.8	18.4	1.23529	20.1
499	Birman	30	21	22.8	20.2	0.7	21.5
500	Birman	19	23	19.2	19.4	1.21053	19.3
501	Birman	30	33	23	24	1.1	23.5
502	Birman	20	23	19.4	22.3	1.15	20.85
503	Birman	18	21	16.3	17.5	1.16667	16.9
504	Birman	19	20	20.5	19.4	1.05263	19.95
505	Birman	29	40	21.8	21.8	1.37931	21.8
506	Birman	26	37	19.1	17.1	1.42308	18.1
507	Birman	32	32	19.7	17.1	1	18.4
508	Birman	22	26	17.5	22.3	1.18182	19.9
509	Birman	31	44	18.4	19.1	1.41935	18.75
510	Birman	32	37	14.5	19.7	1.15625	17.1
511	Birman	21	25	22.3	19.4	1.19048	20.85
512	Birman	22	22	18.4	17.3	1	17.85
513	Birman	30	44	25.7	22.9	1.46667	24.3
514	Birman	24	27	15.9	17.5	1.125	16.7
515	Birman	20	23	20.5	21.8	1.15	21.15
516	Birman	29	33	19.9	17.6	1.13793	18.75
517	Birman	39	54	22.1	18.4	1.38462	20.25
518	Birman	21	20	20.5	17.3	0.952381	18.9
519	Birman	23	23	17.6	21.8	1	19.7
520	Birman	35	44	21.4	18.4	1.25714	19.9
521	Birman	39	47	20.3	19.6	1.20513	19.95
522	Birman	20	24	17.5	17.5	1.2	17.5
523	Birman	41	35	20.3	22.1	0.853659	21.2
524	Birman	29	32	20.8	19.1	1.10345	19.95
525	Birman	35	34	14.4	15.4	0.971429	14.9
526	Birman	25	30	16.3	17.3	1.2	16.8
527	Birman	23	27	21.8	21.8	1.17391	21.8
528	Birman	18	23	23.1	21	1.27778	22.05
529	Bombay	44	41	28.1	27.2	0.931818	27.65
530	Bombay	28	25	24.4	24.4	0.892857	24.4
531	Bombay	62	71	30.1	30.2	1.14516	30.15
532	Bombay	23	21	23.9	25.3	0.913043	24.6
533	Bombay	19	18	15.5	19.6	0.947368	17.55
534	Bombay	24	20	18.4	16.3	0.833333	17.35
535	Bombay	27	25	23.9	24.2	0.925926	24.05
536	Bombay	28	24	18.4	19.2	0.857143	18.8
537	Bombay	21	18	17.3	21	0.857143	19.15
538	Bombay	27	30	22.1	19	1.11111	20.55
539	Bombay	153	191	24.6	24.6	1.24837	24.6
540	Bombay	26	27	20.5	23.4	1.03846	21.95
541	Bombay	20	18	23.6	26.5	0.9	25.05
542	Bombay	26	28	21.3	19.9	1.07692	20.6
543	Bombay	22	25	20.2	19.4	1.13636	19.8
544	Bombay	22	22	14.9	14	1	14.45
545	Bombay	30	29	19.7	19.7	0.966667	19.7
546	Bombay	23	22	19.1	17.6	0.956522	18.35
547	Bombay	22	24	20.5	17.3	1.09091	18.9
548	Bombay	23	22	25	23.9	0.956522	24.45
549	Bombay	25	20	23.9	20.2	0.8	22.05
550	Bombay	22	24	15.5	17.5	1.09091	16.5
551	Bombay	36	48	24.7	24.9	1.33333	24.8
552	Bombay	28	24	16.6	17.5	0.857143	17.05
553	Bombay	27	21	18.4	18.4	0.777778	18.4
554	Bombay	30	33	21.8	23.7	1.1	22.75
555	Bombay	22	19	18.4	19.4	0.863636	18.9
556	Bombay	46	51	26.5	23	1.1087	24.75
557	Bombay	22	22	25.3	22.3	1	23.8
558	Bombay	31	29	23.7	24.4	0.935484	24.05
559	Bombay	33	39	17.8	17.7	1.18182	17.75
560	Bombay	43	36	22.3	25.9	0.837209	24.1
561	Bombay	93	117	30	28.2	1.25806	29.1
562	Bombay	25	36	29	24.2	1.44	26.6
563	Bombay	114	142	15.6	18.8	1.24561	17.2
564	Bombay	52	51	23.4	23.3	0.980769	23.35
565	Bombay	47	45	22	24.3	0.957447	23.15
566	Bombay	86	80	26.5	23.5	0.930233	25
567	Bombay	55	53	19.5	20.5	0.963636	20
568	Bombay	72	63	25.3	23	0.875	24.15
569	Bombay	39	44	17.3	15.2	1.12821	16.25
570	Bombay	30	32	19.1	19.1	1.06667	19.1
571	Bombay	107	90	22.1	25.7	0.841121	23.9
572	Bombay	92	98	18.6	19.9	1.06522	19.25
573	Bombay	30	22	23.7	22.9	0.733333	23.3
574	Bombay	31	31	16.2	21.8	1	19
575	Bombay	25	28	26.5	23.9	1.12	25.2
576	Bombay	27	28	20.5	17.3	1.03704	18.9
577	Bombay	16	18	24.4	26.5	1.125	25.45
578	Bombay	41	47	16.1	19.5	1.14634	17.8
579	British Shorthair	165	155	32.6	29.9	0.939394	31.25
580	British Shorthair	323	308	28.6	27.6	0.95356	28.1
581	British Shorthair	255	252	25.5	23.7	0.988235	24.6
582	British Shorthair	365	372	26.5	24.1	1.01918	25.3
583	British Shorthair	358	324	26.5	27.8	0.905028	27.15
584	British Shorthair	208	191	27.3	26.8	0.918269	27.05
585	British Shorthair	107	110	28.4	31.3	1.02804	29.85
586	British Shorthair	104	112	22.8	24.4	1.07692	23.6
587	British Shorthair	47	46	23.1	20.3	0.978723	21.7
588	British Shorthair	188	169	23.5	22.2	0.898936	22.85
589	British Shorthair	165	174	28.2	28.4	1.05455	28.3
590	British Shorthair	88	93	23.9	22.8	1.05682	23.35
591	British Shorthair	115	126	22.2	23	1.09565	22.6
592	British Shorthair	165	169	21.9	22.7	1.02424	22.3
593	British Shorthair	191	162	25.4	22.5	0.848168	23.95
594	British Shorthair	176	184	26.5	27.4	1.04545	26.95
595	British Shorthair	129	112	30.2	27	0.868217	28.6
596	British Shorthair	98	86	26.5	28.6	0.877551	27.55
597	British Shorthair	193	197	25.1	26.7	1.02073	25.9
598	British Shorthair	172	134	22.4	19.3	0.77907	20.85
599	British Shorthair	171	192	29.1	28.6	1.12281	28.85
600	British Shorthair	162	151	25.2	25.6	0.932099	25.4
601	British Shorthair	111	103	20.6	24.2	0.927928	22.4
602	British Shorthair	180	180	31.5	29	1	30.25
603	British Shorthair	158	149	25	23.7	0.943038	24.35
604	British Shorthair	170	192	30.9	28.7	1.12941	29.8
605	British Shorthair	196	174	27.7	22.6	0.887755	25.15
606	British Shorthair	145	122	23.8	24.9	0.841379	24.35
607	British Shorthair	40	34	26.5	24.9	0.85	25.7
608	British Shorthair	103	80	26.2	26.2	0.776699	26.2
609	British Shorthair	203	172	28.4	28.9	0.847291	28.65
610	British Shorthair	169	163	23.5	25.6	0.964497	24.55
611	British Shorthair	171	135	22.5	23.9	0.789474	23.2
612	British Shorthair	151	134	23.6	21.1	0.887417	22.35
613	British Shorthair	77	58	25	25.7	0.753247	25.35
614	British Shorthair	84	77	22.2	25.3	0.916667	23.75
615	British Shorthair	67	62	23.4	25.1	0.925373	24.25
616	British Shorthair	30	25	17.7	19.9	0.833333	18.8
617	British Shorthair	20	16	24.7	25	0.8	24.85
618	British Shorthair	39	32	24.7	22.1	0.820513	23.4
619	British Shorthair	33	31	20.5	19.9	0.939394	20.2
620	British Shorthair	41	29	19.5	20.5	0.707317	20
621	British Shorthair	20	18	22.3	23.6	0.9	22.95
622	British Shorthair	33	34	22.6	22.6	1.0303	22.6
623	British Shorthair	42	35	29.9	26.5	0.833333	28.2
624	British Shorthair	31	24	22.2	22.6	0.774194	22.4
625	British Shorthair	29	23	24.2	21.8	0.793103	23
626	British Shorthair	41	33	25.9	23.6	0.804878	24.75
627	British Shorthair	41	39	28.1	28.8	0.95122	28.45
628	British Shorthair	37	31	25.6	22.1	0.837838	23.85
629	Burmese	22	20	21.8	21.8	0.909091	21.8
630	Burmese	28	21	26.5	22.3	0.75	24.4
631	Burmese	30	17	20.5	21.8	0.566667	21.15
632	Burmese	23	20	22.3	21.2	0.869565	21.75
633	Burmese	27	25	21	19	0.925926	20
634	Burmese	68	77	28	26.9	1.13235	27.45
635	Burmese	27	20	18.4	21.8	0.740741	20.1
636	Burmese	35	29	17.7	16.5	0.828571	17.1
637	Burmese	28	20	19.2	16.6	0.714286	17.9
638	Burmese	64	72	23.9	24.4	1.125	24.15
639	Burmese	26	19	18.4	20.8	0.730769	19.6
640	Burmese	37	37	22.7	25.1	1	23.9
641	Burmese	26	20	19.4	19.4	0.769231	19.4
642	Burmese	22	22	22.8	20.2	1	21.5
643	Burmese	22	22	22.3	18.4	1	20.35
644	Burmese	19	20	17.6	16.6	1.05263	17.1
645	Burmese	20	22	21.8	19.4	1.1	20.6
646	Burmese	25	23	22.3	25	0.92	23.65
647	Burmese	25	24	22.3	21.2	0.96	21.75
648	Burmese	24	22	25.2	22.3	0.916667	23.75
649	Burmese	27	29	22.2	21.2	1.07407	21.7
650	Burmese	32	38	21.4	17.2	1.1875	19.3
651	Burmese	19	20	21.2	19.4	1.05263	20.3
652	Burmese	31	25	23.1	24.2	0.806452	23.65
653	Burmese	23	20	20.2	20.2	0.869565	20.2
654	Burmese	28	30	18.4	15.5	1.07143	16.95
655	Burmese	43	40	23.3	23.1	0.930233	23.2
656	Burmese	45	35	21	22.6	0.777778	21.8
657	Burmese	23	21	23.6	25.2	0.913043	24.4
658	Burmese	23	18	20.5	18.4	0.782609	19.45
659	Burmese	44	42	24.5	25.3	0.954545	24.9
660	Burmese	25	23	24.4	23.1	0.92	23.75
661	Burmese	28	27	20.1	21.4	0.964286	20.75
662	Burmese	37	42	20.1	20.5	1.13514	20.3
663	Burmese	30	30	19.1	26.9	1	23
664	Burmese	35	39	25.7	23.7	1.11429	24.7
665	Burmese	48	47	22	23.9	0.979167	22.95
666	Burmese	169	163	24.8	25.5	0.964497	25.15
667	Burmese	46	50	15.7	15.9	1.08696	15.8
668	Burmese	62	67	20.4	20.2	1.08065	20.3
669	Burmese	31	32	23.9	25.6	1.03226	24.75
670	Burmese	24	23	25	23.1	0.958333	24.05
671	Burmese	39	43	14.9	16.1	1.10256	15.5
672	Burmese	116	100	13.2	14.9	0.862069	14.05
673	Burmese	139	148	28.8	28.7	1.06475	28.75
674	Burmese	56	70	25.6	24.7	1.25	25.15
675	Burmese	31	35	21.8	20.5	1.12903	21.15
676	Burmese	47	45	21.8	18.4	0.957447	20.1
677	Burmese	45	45	19.9	18.9	1	19.4
678	Burmese	20	21	17.1	17.1	1.05	17.1
679	Burmilla	31	30	23.4	22.6	0.967742	23
680	Burmilla	38	39	21.8	20.3	1.02632	21.05
681	Burmilla	29	27	26.5	23.1	0.931034	24.8
682	Burmilla	24	26	28.8	26.5	1.08333	27.65
683	Burmilla	25	26	20.2	22.3	1.04	21.25
684	Burmilla	96	127	22.4	23.5	1.32292	22.95
685	Burmilla	41	45	21.2	20.9	1.09756	21.05
686	Burmilla	89	100	28.3	25.9	1.1236	27.1
687	Burmilla	26	23	20.5	22.2	0.884615	21.35
688	Burmilla	19	19	26.5	25.2	1	25.85
689	Burmilla	37	42	21	24.5	1.13514	22.75
690	Burmilla	13	13	30.2	28.3	1	29.25
691	Burmilla	21	25	22.8	20.8	1.19048	21.8
692	Burmilla	23	20	21.8	23.9	0.869565	22.85
693	Burmilla	20	21	25.3	22.8	1.05	24.05
694	Burmilla	19	20	26.5	24.2	1.05263	25.35
695	Burmilla	22	23	26.5	27.7	1.04545	27.1
696	Burmilla	24	21	24.2	24.2	0.875	24.2
697	Burmilla	45	34	11	12	0.755556	11.5
698	Burmilla	75	82	26.1	25.5	1.09333	25.8
699	Burmilla	46	42	22.7	23.5	0.913043	23.1
700	Burmilla	23	26	22.2	21.8	1.13043	22
701	Burmilla	47	53	27.5	25.1	1.12766	26.3
702	Burmilla	15	22	26.5	27.8	1.46667	27.15
703	Burmilla	13	13	24.4	24.7	1	24.55
704	Burmilla	13	13	26.5	26.5	1	26.5
705	Burmilla	132	164	26.3	24.7	1.24242	25.5
706	Burmilla	23	27	29	27.8	1.17391	28.4
707	Burmilla	35	38	24.3	24.1	1.08571	24.2
708	Burmilla	16	21	26.5	28	1.3125	27.25
709	Burmilla	48	48	24.9	22.4	1	23.65
710	Burmilla	30	35	27.4	28.1	1.16667	27.75
711	Burmilla	13	15	18.4	19.9	1.15385	19.15
712	Burmilla	60	72	25.7	25.7	1.2	25.7
713	Burmilla	17	21	26.5	26.5	1.23529	26.5
714	Burmilla	20	22	23.6	22.3	1.1	22.95
715	Burmilla	71	82	29.2	24.9	1.15493	27.05
716	Burmilla	29	36	32	29.9	1.24138	30.95
717	Burmilla	122	119	32.3	34.6	0.97541	33.45
718	Burmilla	79	81	22.7	25.8	1.02532	24.25
719	Burmilla	57	67	27.3	25.6	1.17544	26.45
720	Burmilla	97	122	24.3	27.2	1.25773	25.75
721	Burmilla	19	17	20.5	19.4	0.894737	19.95
722	Burmilla	35	40	26.5	28.6	1.14286	27.55
723	Burmilla	32	40	28.7	26.5	1.25	27.6
724	Burmilla	21	28	25.4	24.4	1.33333	24.9
725	Burmilla	28	30	21.3	22.6	1.07143	21.95
726	Burmilla	84	104	28.2	28.5	1.2381	28.35
727	Burmilla	29	38	32.6	28.4	1.31034	30.5
728	Burmilla	52	57	23.6	25	1.09615	24.3
729	Chartreux	202	217	29.3	30	1.07426	29.65
730	Chartreux	131	142	33.1	29.1	1.08397	31.1
731	Chartreux	24	23	23.9	25.3	0.958333	24.6
732	Chartreux	28	27	22.8	20.8	0.964286	21.8
733	Chartreux	23	29	22.8	21.2	1.26087	22
734	Chartreux	27	34	24.4	22.9	1.25926	23.65
735	Chartreux	44	51	34.1	30.4	1.15909	32.25
736	Chartreux	49	50	20.9	20.7	1.02041	20.8
737	Chartreux	19	23	28	26.5	1.21053	27.25
738	Chartreux	21	23	20.5	17.5	1.09524	19
739	Chartreux	41	50	27.2	27.9	1.21951	27.55
740	Chartreux	24	26	25.3	23.9	1.08333	24.6
741	Chartreux	24	29	26.5	26.5	1.20833	26.5
742	Chartreux	44	50	26.5	27.2	1.13636	26.85
743	Chartreux	29	37	27.6	27.5	1.27586	27.55
744	Chartreux	19	19	20.2	21.8	1	21
745	Chartreux	34	37	24.7	21.8	1.08824	23.25
746	Chartreux	30	28	24.2	24.2	0.933333	24.2
747	Chartreux	21	29	27.7	25.2	1.38095	26.45
748	Chartreux	23	29	26.5	27.8	1.26087	27.15
749	Chartreux	20	22	19.4	19.4	1.1	19.4
750	Chartreux	19	22	29	27.8	1.15789	28.4
751	Chartreux	40	45	28	24.3	1.125	26.15
752	Chartreux	21	24	27.8	25.2	1.14286	26.5
753	Chartreux	22	30	30.4	27.8	1.36364	29.1
754	Chartreux	34	47	30.6	27.3	1.38235	28.95
755	Chartreux	19	22	24.2	22.8	1.15789	23.5
756	Chartreux	24	30	27.7	26.5	1.25	27.1
757	Chartreux	37	55	28.7	29.3	1.48649	29
758	Chartreux	52	56	28	23.9	1.07692	25.95
759	Chartreux	28	37	20.1	21.8	1.32143	20.95
760	Chartreux	42	54	23.6	23.6	1.28571	23.6
761	Chartreux	32	40	29.2	27.4	1.25	28.3
762	Chartreux	38	46	18.9	18.4	1.21053	18.65
763	Chartreux	128	109	26	26.2	0.851562	26.1
764	Chartreux	72	84	23.5	24.2	1.16667	23.85
765	Chartreux	58	54	25.3	27.8	0.931034	26.55
766	Chartreux	55	55	27.8	23.1	1	25.45
767	Chartreux	64	83	28.5	28.3	1.29688	28.4
768	Chartreux	64	62	23.3	25.6	0.96875	24.45
769	Chartreux	44	50	26.5	22.7	1.13636	24.6
770	Chartreux	41	55	24.3	25.7	1.34146	25
771	Chartreux	25	29	26.5	27.6	1.16	27.05
772	Chartreux	39	42	21.8	22.9	1.07692	22.35
773	Chartreux	40	35	20.7	23.1	0.875	21.9
774	Chartreux	33	38	21.8	19.9	1.15152	20.85
775	Chartreux	102	98	25	28.4	0.960784	26.7
776	Chartreux	27	31	23.9	21.8	1.14815	22.85
777	Chartreux	62	78	26.5	26	1.25806	26.25
778	Chartreux	110	131	25	25	1.19091	25
779	Chausie	22	23	18.4	19.4	1.04545	18.9
780	Chausie	25	33	23.9	21.2	1.32	22.55
781	Chausie	33	41	20.1	20.5	1.24242	20.3
782	Chausie	32	33	20.5	21.3	1.03125	20.9
783	Chausie	18	19	23.1	19.9	1.05556	21.5
784	Chausie	32	41	19.6	19.7	1.28125	19.65
785	Chausie	47	54	24.4	25.9	1.14894	25.15
786	Chausie	32	44	30.9	27.3	1.375	29.1
787	Chausie	14	18	26.5	26.5	1.28571	26.5
788	Chausie	15	16	31.6	32.4	1.06667	32
789	Chausie	26	37	30.5	26.5	1.42308	28.5
790	Chausie	33	38	29.2	24.9	1.15152	27.05
791	Chausie	29	37	27.4	26.5	1.27586	26.95
792	Chausie	35	41	32.1	32	1.17143	32.05
793	Chausie	32	40	27.4	29	1.25	28.2
794	Chausie	39	48	21.8	26.5	1.23077	24.15
795	Chausie	82	93	28.3	25.4	1.13415	26.85
796	Chausie	24	29	23.9	20.8	1.20833	22.35
797	Chausie	16	21	29.7	28.3	1.3125	29
798	Chausie	75	89	25.2	27.7	1.18667	26.45
799	Colorpoint Shorthair	37	58	25.1	27.4	1.56757	26.25
800	Colorpoint Shorthair	42	66	27.9	25.8	1.57143	26.85
801	Colorpoint Shorthair	15	18	21.8	22.6	1.2	22.2
802	Colorpoint Shorthair	15	24	22.3	23.1	1.6	22.7
803	Colorpoint Shorthair	17	24	26.5	26.5	1.41176	26.5
804	Colorpoint Shorthair	17	27	29.7	28.3	1.58824	29
805	Colorpoint Shorthair	22	31	22.3	21.25	1.40909	21.775
806	Colorpoint Shorthair	17	19	24.7	22.6	1.11765	23.65
807	Colorpoint Shorthair	23	31	19.4	18.4	1.34783	18.9
808	Colorpoint Shorthair	19	24	21.8	21.8	1.26316	21.8
809	Colorpoint Shorthair	18	24	17.3	18.4	1.33333	17.85
810	Colorpoint Shorthair	16	26	15.2	18.4	1.625	16.8
811	Colorpoint Shorthair	35	56	23.9	22.1	1.6	23
812	Colorpoint Shorthair	31	60	17.8	16.5	1.93548	17.15
813	Colorpoint Shorthair	27	42	22.2	23.9	1.55556	23.05
814	Colorpoint Shorthair	335	471	25.5	28.6	1.40597	27.05
815	Colorpoint Shorthair	87	116	25.4	27.4	1.33333	26.4
816	Colorpoint Shorthair	28	33	26.5	24.2	1.17857	25.35
817	Colorpoint Shorthair	14	25	21.8	19.9	1.78571	20.85
818	Colorpoint Shorthair	40	57	25.6	24.1	1.425	24.85
819	Cornish Rex	19	28	23.6	19.2	1.47368	21.4
820	Cornish Rex	21	23	18.4	17.3	1.09524	17.85
821	Cornish Rex	22	25	17.3	19.4	1.13636	18.35
822	Cornish Rex	17	21	14.9	14.9	1.23529	14.9
823	Cornish Rex	18	22	18.4	19.6	1.22222	19
824	Cornish Rex	44	59	25.8	27.9	1.34091	26.85
825	Cornish Rex	16	23	19.6	15.9	1.4375	17.75
826	Cornish Rex	21	24	18.4	16.3	1.14286	17.35
827	Cornish Rex	19	21	26.5	23.6	1.10526	25.05
828	Cornish Rex	18	23	17.3	21.8	1.27778	19.55
829	Cornish Rex	27	37	15.2	16.9	1.37037	16.05
830	Cornish Rex	17	20	23.1	19.6	1.17647	21.35
831	Cornish Rex	21	27	22.3	14.7	1.28571	18.5
832	Cornish Rex	19	22	21.8	17.3	1.15789	19.55
833	Cornish Rex	19	25	15.9	14	1.31579	14.95
834	Cornish Rex	19	23	14	14.9	1.21053	14.45
835	Cornish Rex	56	75	25.5	25.5	1.33929	25.5
836	Cornish Rex	16	20	23.1	23.1	1.25	23.1
837	Cornish Rex	16	21	15.9	12.9	1.3125	14.4
838	Cornish Rex	21	29	16.3	19.4	1.38095	17.85
839	Cornish Rex	48	76	22.6	25.5	1.58333	24.05
840	Cornish Rex	19	21	18.4	19.6	1.10526	19
841	Cornish Rex	17	20	26.5	18.4	1.17647	22.45
842	Cornish Rex	17	24	23.6	21.8	1.41176	22.7
843	Cornish Rex	19	22	21.8	25	1.15789	23.4
844	Cornish Rex	17	22	22.6	22.6	1.29412	22.6
845	Cornish Rex	20	21	21	19.6	1.05	20.3
846	Cornish Rex	23	24	21.8	21.8	1.04348	21.8
847	Cornish Rex	17	20	21	18.4	1.17647	19.7
848	Cornish Rex	19	21	13.6	15.5	1.10526	14.55
849	Cornish Rex	15	17	17.1	18.4	1.13333	17.75
850	Cornish Rex	15	20	18.4	18.4	1.33333	18.4
851	Cornish Rex	17	19	17.1	14.9	1.11765	16
852	Cornish Rex	18	21	21	23.1	1.16667	22.05
853	Cornish Rex	18	22	25	25	1.22222	25
854	Cornish Rex	19	27	17.3	17.3	1.42105	17.3
855	Cornish Rex	30	40	19.7	22.2	1.33333	20.95
856	Cornish Rex	16	21	14.9	14	1.3125	14.45
857	Cornish Rex	22	25	22.3	23.6	1.13636	22.95
858	Cornish Rex	19	20	14.9	14.9	1.05263	14.9
859	Cornish Rex	23	29	25.3	22.8	1.26087	24.05
860	Cornish Rex	45	59	26.5	25.2	1.31111	25.85
861	Cornish Rex	23	31	23.1	27.8	1.34783	25.45
862	Cornish Rex	44	58	26.5	24.6	1.31818	25.55
863	Cornish Rex	19	23	15.9	12.9	1.21053	14.4
864	Cornish Rex	17	20	21	24.7	1.17647	22.85
865	Cornish Rex	18	20	24.7	22.6	1.11111	23.65
866	Cornish Rex	22	31	15.5	20.2	1.40909	17.85
867	Cornish Rex	30	42	19.7	18.4	1.4	19.05
868	Cornish Rex	33	38	20.3	17.7	1.15152	19
869	Cymric	26	26	17.6	16.9	1	17.25
870	Cymric	35	38	20.5	19	1.08571	19.75
871	Cymric	38	46	32.6	27.4	1.21053	30
872	Cymric	24	24	25.3	25.2	1	25.25
873	Cymric	35	38	17.2	22.1	1.08571	19.65
874	Cymric	29	34	23.9	23.4	1.17241	23.65
875	Cymric	28	31	20.8	18.4	1.10714	19.6
876	Cymric	92	103	28.4	24.3	1.11957	26.35
877	Cymric	63	96	27.8	29.9	1.52381	28.85
878	Cymric	12	17	18.4	19.9	1.41667	19.15
879	Cymric	71	65	25.3	21.8	0.915493	23.55
880	Cymric	38	42	21.3	20.3	1.10526	20.8
881	Cymric	15	18	30.9	24.4	1.2	27.65
882	Cymric	33	35	22.6	19	1.06061	20.8
883	Cymric	16	19	17.1	18.4	1.1875	17.75
884	Cymric	21	18	21.8	25.2	0.857143	23.5
885	Cymric	35	35	19.6	20.5	1	20.05
886	Cymric	93	100	19	18.9	1.07527	18.95
887	Cymric	24	27	23.9	22.3	1.125	23.1
888	Cymric	58	70	22.3	24.1	1.2069	23.2
889	Cymric	17	21	22.6	22.6	1.23529	22.6
890	Cymric	19	22	25	23.1	1.15789	24.05
891	DevonRex	24	19	22.4	20.2	0.791667	21.3
892	DevonRex	25	19	15.9	19.4	0.76	17.65
893	DevonRex	26	22	19.2	19.2	0.846154	19.2
894	DevonRex	21	18	20.5	19.4	0.857143	19.95
895	DevonRex	22	21	19.4	17.3	0.954545	18.35
896	DevonRex	23	17	19.4	18.4	0.73913	18.9
897	DevonRex	19	15	15.5	17.5	0.789474	16.5
898	DevonRex	24	23	23.1	25.3	0.958333	24.2
899	DevonRex	26	22	18.4	18.4	0.846154	18.4
900	DevonRex	26	19	16.6	17.6	0.730769	17.1
901	DevonRex	23	22	19.4	17.3	0.956522	18.35
902	DevonRex	26	24	16.9	17.5	0.923077	17.2
903	DevonRex	31	28	19.1	15.2	0.903226	17.15
904	DevonRex	20	19	18.4	20.5	0.95	19.45
905	DevonRex	33	28	16.9	16.2	0.848485	16.55
906	DevonRex	24	24	20.2	21.2	1	20.7
907	DevonRex	23	18	20.2	21.8	0.782609	21
908	DevonRex	58	70	27.6	26	1.2069	26.8
909	DevonRex	18	15	18.4	18.4	0.833333	18.4
910	DevonRex	35	30	18.4	18.4	0.857143	18.4
911	DevonRex	23	19	16.2	15.2	0.826087	15.7
912	DevonRex	27	25	19.9	16.2	0.925926	18.05
913	DevonRex	26	21	16.6	18.4	0.807692	17.5
914	DevonRex	28	24	14	17.7	0.857143	15.85
915	DevonRex	27	22	20.8	19.9	0.814815	20.35
916	DevonRex	19	17	16.3	16.3	0.894737	16.3
917	DevonRex	26	23	17.5	17.5	0.884615	17.5
918	DevonRex	20	19	23.6	22.3	0.95	22.95
919	DevonRex	25	23	23.1	19.9	0.92	21.5
920	DevonRex	20	21	21.8	20.5	1.05	21.15
921	DevonRex	24	25	27.8	23.4	1.04167	25.6
922	DevonRex	18	18	21.8	23.1	1	22.45
923	DevonRex	20	15	14.9	15.9	0.75	15.4
924	DevonRex	21	17	13.2	15.9	0.809524	14.55
925	DevonRex	23	22	18.4	18.4	0.956522	18.4
926	DevonRex	23	22	14.9	16.3	0.956522	15.6
927	DevonRex	29	26	19.2	15.6	0.896552	17.4
928	DevonRex	24	23	17.5	14.7	0.958333	16.1
929	DevonRex	26	21	18.4	17.5	0.807692	17.95
930	DevonRex	23	20	19.4	20.5	0.869565	19.95
931	DevonRex	26	23	17.6	15.9	0.884615	16.75
932	DevonRex	19	18	15.9	16.3	0.947368	16.1
933	DevonRex	45	44	17.4	17.9	0.977778	17.65
934	DevonRex	24	23	22.8	20.2	0.958333	21.5
935	DevonRex	22	20	20.5	18.4	0.909091	19.45
936	DevonRex	23	21	17.5	17.5	0.913043	17.5
937	DevonRex	33	27	27.4	26.5	0.818182	26.95
938	DevonRex	22	20	16.3	18.4	0.909091	17.35
939	DevonRex	22	17	21.8	17.5	0.772727	19.65
940	DevonRex	26	23	23.9	19.2	0.884615	21.55
941	Donskoy	33	38	22.6	19.7	1.15152	21.15
942	Donskoy	37	43	28.3	31.3	1.16216	29.8
943	Donskoy	70	84	26.5	23.3	1.2	24.9
944	Donskoy	41	53	17.4	20.7	1.29268	19.05
945	Donskoy	171	174	25.6	24.8	1.01754	25.2
946	Donskoy	24	32	27.8	26.5	1.33333	27.15
947	Donskoy	147	178	26.2	22.8	1.21088	24.5
948	Donskoy	31	32	24.4	22.8	1.03226	23.6
949	Donskoy	48	54	22.9	17.8	1.125	20.35
950	Donskoy	24	25	22.6	23.1	1.04167	22.85
951	Donskoy	20	21	19.6	18.4	1.05	19
952	Donskoy	29	28	15.5	16.3	0.965517	15.9
953	Donskoy	25	21	23.1	23.6	0.84	23.35
954	Donskoy	305	332	18.2	21.9	1.08852	20.05
955	Donskoy	28	33	25.3	22.3	1.17857	23.8
956	Donskoy	38	39	23.1	21.8	1.02632	22.45
957	Donskoy	74	84	30.2	28	1.13514	29.1
958	Donskoy	73	80	21.2	22.4	1.09589	21.8
959	Donskoy	69	84	35.3	32.7	1.21739	34
960	Donskoy	85	95	22.6	21.9	1.11765	22.25
961	Donskoy	79	100	27.8	30.1	1.26582	28.95
962	Donskoy	31	39	20.2	23.9	1.25806	22.05
963	Donskoy	40	54	23.4	22.7	1.35	23.05
964	EgyptianMau	192	268	26.4	24.6	1.39583	24.6
965	EgyptianMau	21	19	18.4	19.6	0.904762	19.6
966	EgyptianMau	24	28	25.3	27.8	1.16667	27.8
967	EgyptianMau	23	26	24.2	25.4	1.13043	25.4
968	EgyptianMau	54	68	27	26.5	1.25926	26.5
969	EgyptianMau	23	31	21.3	27.5	1.34783	27.5
970	EgyptianMau	21	25	22.3	21.8	1.19048	21.8
971	EgyptianMau	19	23	23.9	22.3	1.21053	22.3
972	EgyptianMau	16	25	23.9	21.8	1.5625	21.8
973	EgyptianMau	26	28	22.8	20.8	1.07692	20.8
974	EgyptianMau	20	26	23.6	20.5	1.3	20.5
975	EgyptianMau	20	24	15.5	16.3	1.2	16.3
976	EgyptianMau	25	31	22.8	20.5	1.24	20.5
977	EgyptianMau	22	28	21.8	22.2	1.27273	22.2
978	EgyptianMau	23	31	17.5	17.5	1.34783	17.5
979	EgyptianMau	24	28	25.2	25.2	1.16667	25.2
980	EgyptianMau	15	23	25	23.9	1.53333	23.9
981	EgyptianMau	52	67	23.3	21.5	1.28846	21.5
982	EgyptianMau	16	20	28.6	26.5	1.25	26.5
983	EgyptianMau	26	27	21.8	22.2	1.03846	22.2
984	EgyptianMau	17	24	26.5	25.2	1.41176	25.2
985	EgyptianMau	17	24	12	12.9	1.41176	12.9
986	EgyptianMau	20	25	21.8	23.6	1.25	23.6
987	EgyptianMau	34	42	22.2	22.2	1.23529	22.2
988	EgyptianMau	23	29	20.2	20.8	1.26087	20.8
989	EgyptianMau	16	20	23.1	23.1	1.25	23.1
990	EgyptianMau	44	55	17.4	20.9	1.25	20.9
991	EgyptianMau	38	48	19.8	22.7	1.26316	22.7
992	EgyptianMau	16	22	21.8	19.6	1.375	19.6
993	EgyptianMau	18	24	23.9	23.9	1.33333	23.9
994	EgyptianMau	18	23	25	23.6	1.27778	23.6
995	EgyptianMau	26	41	17.8	22.1	1.57692	22.1
996	EgyptianMau	27	33	26.5	25.5	1.22222	25.5
997	EgyptianMau	19	26	23.1	20.5	1.36842	20.5
998	EgyptianMau	14	18	19.6	19.6	1.28571	19.6
999	EgyptianMau	16	24	19.6	21.2	1.5	21.2
1000	EgyptianMau	17	20	23.1	20.5	1.17647	20.5
1001	EgyptianMau	18	25	30.9	29.7	1.38889	29.7
1002	EgyptianMau	15	17	26.5	23.1	1.13333	23.1
1003	EgyptianMau	19	24	26.5	23.6	1.26316	23.6
1004	EgyptianMau	18	21	23.6	22.3	1.16667	22.3
1005	EgyptianMau	17	19	26.5	21.8	1.11765	21.8
1006	EgyptianMau	17	20	18.4	17.3	1.17647	17.3
1007	EgyptianMau	43	47	21.8	24.4	1.09302	24.4
1008	EgyptianMau	38	48	24.3	19.9	1.26316	19.9
1009	EgyptianMau	15	20	24.7	24.7	1.33333	24.7
1010	EgyptianMau	16	19	26.5	26.5	1.1875	26.5
1011	EgyptianMau	19	26	23.6	23.6	1.36842	23.6
1012	EgyptianMau	19	23	21.2	23.6	1.21053	23.6
1013	EgyptianMau	35	46	24.4	22.7	1.31429	22.7
1014	European Shorthair	103	152	27	28.1	1.47573	27.55
1015	European Shorthair	242	357	33.4	27	1.47521	30.2
1016	European Shorthair	77	114	28.8	29.1	1.48052	28.95
1017	European Shorthair	156	210	25.4	24.2	1.34615	24.8
1018	European Shorthair	142	175	29.3	26.7	1.23239	28
1019	European Shorthair	25	30	24.2	26.5	1.2	25.35
1020	European Shorthair	33	41	23.1	23.1	1.24242	23.1
1021	European Shorthair	61	85	27.9	26	1.39344	26.95
1022	European Shorthair	33	43	29	23.1	1.30303	26.05
1023	European Shorthair	203	215	25.1	19.9	1.05911	22.5
1024	European Shorthair	30	36	28.3	24.7	1.2	26.5
1025	European Shorthair	50	66	24.7	27.6	1.32	26.15
1026	European Shorthair	43	47	23.4	22.3	1.09302	22.85
1027	European Shorthair	70	97	26.1	26.5	1.38571	26.3
1028	European Shorthair	111	159	23.5	24.3	1.43243	23.9
1029	European Shorthair	93	91	21	18.6	0.978495	19.8
1030	European Shorthair	71	120	22.5	22.4	1.69014	22.45
1031	European Shorthair	14	20	19.9	21.8	1.42857	20.85
1032	European Shorthair	37	45	25	22.9	1.21622	23.95
1033	European Shorthair	15	17	23.1	23.1	1.13333	23.1
1034	Exotic	93	44	14.9	17.1	0.473118	16
1035	Exotic	204	107	16.8	16.5	0.52451	16.65
1036	Exotic	131	123	26.3	24.8	0.938931	25.55
1037	Exotic	148	80	22.3	19.6	0.540541	20.95
1038	Exotic	132	39	14.2	15.3	0.295455	14.75
1039	Exotic	81	30	16.5	14	0.37037	15.25
1040	Exotic	210	86	17.1	21.8	0.409524	19.45
1041	Exotic	157	50	16.2	14.9	0.318471	15.55
1042	Exotic	93	59	22.3	21.5	0.634409	21.9
1043	Exotic	102	62	21.9	22.1	0.607843	22
1044	Exotic	251	121	10	11.3	0.482072	10.65
1045	Exotic	141	78	17.9	16.5	0.553191	17.2
1046	Exotic	159	66	15.5	12.8	0.415094	14.15
1047	Exotic	166	55	13.4	14.1	0.331325	13.75
1048	Exotic	27	9	20.5	16.3	0.333333	18.4
1049	Exotic	29	11	16.3	12.5	0.37931	14.4
1050	Exotic	34	9	11.8	12.5	0.264706	12.15
1051	Exotic	36	9	15.9	11.7	0.25	13.8
1052	Exotic	34	13	15	14.5	0.382353	14.75
1053	Exotic	36	13	14	18.4	0.361111	16.2
1054	Exotic	35	11	14	11.7	0.314286	12.85
1055	Exotic	37	12	16.2	16.9	0.324324	16.55
1056	Exotic	36	10	17.7	16.5	0.277778	17.1
1057	Exotic	28	16	14.6	11.3	0.571429	12.95
1058	Exotic	37	13	17.1	14.5	0.351351	15.8
1059	Exotic	29	9	10.3	12.8	0.310345	11.55
1060	Exotic	30	11	13.3	11.7	0.366667	12.5
1061	Exotic	55	23	18.7	15.4	0.418182	17.05
1062	Exotic	37	15	15	12.5	0.405405	13.75
1063	Exotic	28	10	11.3	11.3	0.357143	11.3
1064	Exotic	26	9	12.5	15.5	0.346154	14
1065	Exotic	31	12	15.6	12.9	0.387097	14.25
1066	Exotic	24	9	14	15.9	0.375	14.95
1067	Exotic	41	13	14.6	14	0.317073	14.3
1068	Exotic	35	13	16.5	12.5	0.371429	14.5
1069	Exotic	27	8	14.7	14.7	0.296296	14.7
1070	Exotic	28	12	17.6	14	0.428571	15.8
1071	Exotic	31	11	14	11.3	0.354839	12.65
1072	Exotic	39	12	14	15.6	0.307692	14.8
1073	Exotic	45	28	19.2	19.7	0.622222	19.45
1074	Exotic	47	16	17.2	14	0.340426	15.6
1075	Exotic	32	6	13.3	14	0.1875	13.65
1076	Exotic	29	9	10.7	13.3	0.310345	12
1077	Exotic	52	17	13.2	13.6	0.326923	13.4
1078	Exotic	42	16	14.5	10.4	0.380952	12.45
1079	Exotic	31	8	12.8	13.3	0.258065	13.05
1080	Exotic	32	10	14	17.5	0.3125	15.75
1081	Exotic	35	10	11.6	11.6	0.285714	11.6
1082	Exotic	39	13	14.6	12.5	0.333333	13.55
1083	Exotic	42	20	11.3	12.5	0.47619	11.9
1084	Havana Brown	23	30	15.5	13.2	1.30435	14.35
1085	Havana Brown	42	64	17.1	19l9	1.52381	17.1
1086	Havana Brown	141	182	19.4	22	1.29078	20.7
1087	Havana Brown	21	22	10	11.8	1.04762	10.9
1088	Havana Brown	14	16	14	17.1	1.14286	15.55
1089	Havana Brown	52	74	27.7	27.9	1.42308	27.8
1090	Havana Brown	97	139	30.3	27.1	1.43299	28.7
1091	Havana Brown	41	64	20.3	24.7	1.56098	22.5
1092	Havana Brown	69	95	26.9	26.5	1.37681	26.7
1093	Havana Brown	17	19	19.6	17.1	1.11765	18.35
1094	Havana Brown	18	24	12	12.5	1.33333	12.25
1095	Havana Brown	20	21	11.3	12.9	1.05	12.1
1096	Havana Brown	15	17	9.4	14	1.13333	11.7
1097	Havana Brown	41	53	14	14.9	1.29268	14.45
1098	Havana Brown	19	23	10.6	14	1.21053	12.3
1099	Havana Brown	15	22	18.4	14	1.46667	16.2
1100	Havana Brown	41	43	15.5	13.1	1.04878	14.3
1101	Havana Brown	22	29	15.5	15.5	1.31818	15.5
1102	Havana Brown	47	66	17.1	20.3	1.40426	18.7
1103	Havana Brown	39	53	16.6	17.1	1.35897	16.85
1104	Havana Brown	21	28	19.4	17.3	1.33333	18.35
1105	Havana Brown	21	21	19.6	15.9	1	17.75
1106	Havana Brown	16	22	8.1	14	1.375	11.05
1107	Havana Brown	18	24	17.1	15.9	1.33333	16.5
1108	Havana Brown	19	20	17.1	15.9	1.05263	16.5
1109	Havana Brown	24	31	14	16.3	1.29167	15.15
1110	Havana Brown	17	21	18.4	15.9	1.23529	17.15
1111	Havana Brown	94	99	18.9	18.1	1.05319	18.5
1112	Havana Brown	39	38	14.6	14.5	0.974359	14.55
1113	Havana Brown	30	34	15.2	14	1.13333	14.6
1114	Havana Brown	24	42	20.5	20.5	1.75	20.5
1115	Havana Brown	25	31	13.2	12.5	1.24	12.85
1116	Havana Brown	24	33	27.8	29.3	1.375	28.55
1117	Havana Brown	19	25	15.5	16.3	1.31579	15.9
1118	Havana Brown	20	25	24.7	24.4	1.25	24.55
1119	Havana Brown	29	38	23.7	22.2	1.31034	22.95
1120	Havana Brown	114	133	22.7	22.2	1.16667	22.45
1121	Havana Brown	68	89	17.2	18.4	1.30882	17.8
1122	Havana Brown	33	43	19.2	17.6	1.30303	18.4
1123	Havana Brown	67	79	16.3	16.4	1.1791	16.35
1124	Havana Brown	44	65	20.1	21.1	1.47727	20.6
1125	Havana Brown	42	68	19	17.1	1.61905	18.05
1126	Havana Brown	94	140	28.6	23.7	1.48936	26.15
1127	Havana Brown	43	56	20.7	20.5	1.30233	20.6
1128	Havana Brown	21	23	19.4	18.4	1.09524	18.9
1129	Havana Brown	21	29	21	18.4	1.38095	19.7
1130	Havana Brown	96	114	24.1	23.1	1.1875	23.6
1131	Havana Brown	72	109	21.6	17	1.51389	19.3
1132	Havana Brown	53	71	17.9	16.3	1.33962	17.1
1133	Havana Brown	61	78	18.4	19.6	1.27869	19
1134	Himalayan	147	166	21.1	21.6	1.12925	21.35
1135	Himalayan	35	10	8.53	11.3	0.285714	9.915
1136	Himalayan	41	19	10.1	8.1	0.463415	9.1
1137	Himalayan	29	13	15.5	9.4	0.448276	12.45
1138	Himalayan	68	18	20.1	17.9	0.264706	19
1139	Himalayan	50	35	20.2	14.4	0.7	17.3
1140	Himalayan	29	30	21.3	19.7	1.03448	20.5
1141	Himalayan	32	23	17.7	14	0.71875	15.85
1142	Himalayan	16	18	23.1	26.5	1.125	24.8
1143	Himalayan	49	18	12	15.9	0.367347	13.95
1144	Himalayan	35	35	19	20.1	1	19.55
1145	Himalayan	21	9	8.1	7.5	0.428571	7.8
1146	Himalayan	49	14	14	14	0.285714	14
1147	Himalayan	24	27	15.9	15.5	1.125	15.7
1148	Himalayan	50	22	14.4	13.2	0.44	13.8
1149	Himalayan	35	40	14.5	14	1.14286	14.25
1150	Himalayan	50	45	15.2	19.9	0.9	17.55
1151	Himalayan	74	73	26.5	19.2	0.986486	22.85
1152	Himalayan	113	122	21	18.6	1.07965	19.8
1153	Himalayan	73	70	20	20.6	0.958904	20.3
1154	Himalayan	115	114	26.5	28.4	0.991304	27.45
1155	Himalayan	148	169	24.4	24.8	1.14189	24.6
1156	Himalayan	44	42	17.8	21	0.954545	19.4
1157	Himalayan	24	19	21.2	18.4	0.791667	19.8
1158	Himalayan	27	37	14	16.6	1.37037	15.3
1159	Himalayan	34	40	26.5	25.7	1.17647	26.1
1160	Himalayan	128	144	21.2	21.1	1.125	21.15
1161	Japanese Bobtail	24	23	12.5	16.6	0.958333	14.55
1162	Japanese Bobtail	23	30	26.5	23.9	1.30435	25.2
1163	Japanese Bobtail	23	27	23.6	21.2	1.17391	22.4
1164	Japanese Bobtail	22	25	20.8	21.2	1.13636	21
1165	Japanese Bobtail	64	86	25.4	24.6	1.34375	25
1166	Japanese Bobtail	28	38	27.6	26.5	1.35714	27.05
1167	Japanese Bobtail	23	23	21.8	20.5	1	21.15
1168	Japanese Bobtail	19	23	20.5	16.3	1.21053	18.4
1169	Japanese Bobtail	29	33	23.1	19.9	1.13793	21.5
1170	Japanese Bobtail	23	25	19.4	19.4	1.08696	19.4
1171	Japanese Bobtail	36	44	21.4	20.7	1.22222	21.05
1172	Japanese Bobtail	25	35	22.3	16.3	1.4	19.3
1173	Japanese Bobtail	30	37	21.8	21.3	1.23333	21.55
1174	Japanese Bobtail	17	23	18.4	21.8	1.35294	20.1
1175	Japanese Bobtail	21	25	22.3	21.2	1.19048	21.75
1176	Japanese Bobtail	22	33	17.5	16.9	1.5	17.2
1177	Japanese Bobtail	25	29	17.6	18.4	1.16	18
1178	Japanese Bobtail	28	29	17.5	22.8	1.03571	20.15
1179	Japanese Bobtail	23	27	25.2	21.8	1.17391	23.5
1180	Japanese Bobtail	42	46	21.5	20.5	1.09524	21
1181	Japanese Bobtail	21	22	19.4	15.5	1.04762	17.45
1182	Japanese Bobtail	26	28	22.8	21.8	1.07692	22.3
1183	Japanese Bobtail	23	22	20.2	17.5	0.956522	18.85
1184	Japanese Bobtail	17	18	18.4	18.4	1.05882	18.4
1185	Japanese Bobtail	26	33	17.6	21.2	1.26923	19.4
1186	Japanese Bobtail	32	36	23.9	23.7	1.125	23.8
1187	Japanese Bobtail	25	25	20.8	19.4	1	20.1
1188	Japanese Bobtail	24	30	23.6	23.9	1.25	23.75
1189	Japanese Bobtail	22	25	22.8	26.5	1.13636	24.65
1190	Japanese Bobtail	20	25	21.2	19.4	1.25	20.3
1191	Japanese Bobtail	20	28	20.2	25.2	1.4	22.7
1192	Japanese Bobtail	24	29	14.7	18.4	1.20833	16.55
1193	Japanese Bobtail	23	32	17.5	22.8	1.3913	20.15
1194	Japanese Bobtail	20	23	19.4	19.4	1.15	19.4
1195	Japanese Bobtail	23	28	20.2	23.9	1.21739	22.05
1196	Japanese Bobtail	22	23	19.4	19.4	1.04545	19.4
1197	Japanese Bobtail	20	21	23.1	19.4	1.05	21.25
1198	Japanese Bobtail	17	21	19.6	14.9	1.23529	17.25
1199	Japanese Bobtail	21	24	21.8	20.5	1.14286	21.15
1200	Japanese Bobtail	21	31	18.4	21.2	1.47619	19.8
1201	Japanese Bobtail	20	27	26.5	25.2	1.35	25.85
1202	Japanese Bobtail	17	23	19.6	16.3	1.35294	17.95
1203	Japanese Bobtail	22	31	20.5	18.4	1.40909	19.45
1204	Japanese Bobtail	23	23	23.6	18.4	1	21
1205	Japanese Bobtail	35	43	21.4	23.1	1.22857	22.25
1206	Japanese Bobtail	21	25	25	22.3	1.19048	23.65
1207	Japanese Bobtail	20	27	25.2	21.8	1.35	23.5
1208	Japanese Bobtail	22	24	22.3	25.2	1.09091	23.75
1209	Japanese Bobtail	20	26	22.3	22.3	1.3	22.3
1210	Japanese Bobtail	21	24	20.5	19.4	1.14286	19.95
1211	Khao Manee	35	41	20.7	17.8	1.17143	19.25
1212	Khao Manee	12	16	22.6	24.4	1.33333	23.5
1213	Khao Manee	19	19	19.6	13.2	1	16.4
1214	Khao Manee	40	28	14	17.8	0.7	15.9
1215	Khao Manee	16	22	18.4	19.6	1.375	19
1216	Khao Manee	50	61	27.1	26.5	1.22	26.8
1217	Khao Manee	317	350	24.4	22.4	1.1041	23.4
1218	Khao Manee	124	142	24.1	20.6	1.14516	22.35
1219	Khao Manee	157	215	32.6	28.8	1.36943	30.7
1220	Khao Manee	26	31	20.8	22.8	1.19231	21.8
1221	Khao Manee	33	43	28.4	27.4	1.30303	27.9
1222	Khao Manee	62	76	33	30.5	1.22581	31.75
1223	Khao Manee	55	72	24.4	23.7	1.30909	24.05
1224	Khao Manee	113	126	28.7	25.9	1.11504	27.3
1225	Khao Manee	64	79	24.8	26.5	1.23438	25.65
1226	Khao Manee	203	256	22.5	23.1	1.26108	22.8
1227	Khao Manee	49	66	23.7	25.3	1.34694	24.5
1228	Khao Manee	19	23	18.4	17.3	1.21053	17.85
1229	Khao Manee	94	108	30	26.9	1.14894	28.45
1230	Khao Manee	25	31	22.8	21.2	1.24	22
1231	Khao Manee	64	78	22.8	21.3	1.21875	22.05
1232	Khao Manee	31	40	21.4	21	1.29032	21.2
1233	Khao Manee	113	120	23.4	22.5	1.06195	22.95
1234	Khao Manee	63	78	21.6	22.6	1.2381	22.1
1235	Khao Manee	43	54	27.2	23.4	1.25581	25.3
1236	Khao Manee	96	103	29.6	27.7	1.07292	28.65
1237	Khao Manee	51	56	20.7	17.5	1.09804	19.1
1238	Khao Manee	38	52	22.1	22.3	1.36842	22.2
1239	Khao Manee	68	79	27.4	27.8	1.16176	27.6
1240	Khao Manee	75	93	27.7	25	1.24	26.35
1241	Khao Manee	98	110	23.5	25.2	1.12245	24.35
1242	Khao Manee	53	64	29.8	30.7	1.20755	30.25
1243	Khao Manee	60	74	22.8	21.3	1.23333	22.05
1244	Khao Manee	23	31	29	25.3	1.34783	27.15
1245	Khao Manee	84	92	23.3	17.3	1.09524	20.3
1246	Khao Manee	91	111	24.6	27.2	1.21978	25.9
1247	Khao Manee	54	78	21.1	21.1	1.44444	21.1
1248	Khao Manee	37	47	27.3	23.4	1.27027	25.35
1249	Khao Manee	60	75	28	23.9	1.25	25.95
1250	Khao Manee	40	55	23.6	22.7	1.375	23.15
1251	Khao Manee	69	92	29.6	27.8	1.33333	28.7
1252	Khao Manee	39	46	20.9	23.6	1.17949	22.25
1253	Khao Manee	19	27	20.5	20.2	1.42105	20.35
1254	Khao Manee	47	62	27.8	25.9	1.31915	26.85
1255	Khao Manee	56	73	27.5	26.5	1.30357	27
1256	Khao Manee	81	100	22.2	24.2	1.23457	23.2
1257	Khao Manee	22	33	21.8	22.8	1.5	22.3
1258	Khao Manee	106	130	24.9	23.9	1.22642	24.4
1259	Khao Manee	38	52	22.7	21.8	1.36842	22.25
1260	Khao Manee	41	52	28.3	26.5	1.26829	27.4
1261	Korat	26	26	19.9	16.9	1	18.4
1262	Korat	26	20	13.3	14.7	0.769231	14
1263	Korat	23	23	16.3	12.5	1	14.4
1264	Korat	21	22	20.5	14	1.04762	17.25
1265	Korat	21	21	17.3	14	1	15.65
1266	Korat	28	28	17.6	20.8	1	19.2
1267	Korat	178	224	27.1	25.7	1.25843	26.4
1268	Korat	29	33	22.6	25.4	1.13793	24
1269	Korat	20	22	17.5	18.4	1.1	17.95
1270	Korat	22	23	21.2	17.5	1.04545	19.35
1271	Korat	46	62	22	22.7	1.34783	22.35
1272	Korat	22	26	16.3	14	1.18182	15.15
1273	Korat	27	32	18.4	14.6	1.18519	16.5
1274	Korat	38	52	25.1	25.1	1.36842	25.1
1275	Korat	18	18	25	20.5	1	22.75
1276	Korat	25	37	16.6	18.4	1.48	17.5
1277	Korat	72	94	26.5	21.6	1.30556	24.05
1278	Korat	43	61	22.1	23.8	1.4186	22.95
1279	Korat	21	29	22.3	21.8	1.38095	22.05
1280	Korat	29	43	24.4	19.1	1.48276	21.75
1281	Korat	26	28	14.7	14.6	1.07692	14.65
1282	Korat	53	53	26.5	22.8	1	24.65
1283	Korat	106	134	25.9	23.1	1.26415	24.5
1284	Korat	29	33	21.3	20.5	1.13793	20.9
1285	Korat	72	88	23.3	23.6	1.22222	23.45
1286	Korat	97	124	25.5	25.6	1.27835	25.55
1287	Korat	26	29	24.2	26.5	1.11538	25.35
1288	Korat	14	15	24.4	21.8	1.07143	23.1
1289	Korat	26	32	26.5	28.6	1.23077	27.55
1290	Korat	49	62	23.3	20.8	1.26531	22.05
1291	Korat	30	35	19.9	17.7	1.16667	18.8
1292	Korat	27	28	17.6	20.2	1.03704	18.9
1293	Korat	63	80	21.5	23.4	1.26984	22.45
1294	Korat	57	66	25.2	21.8	1.15789	23.5
1295	Korat	67	84	23.4	23.3	1.25373	23.35
1296	Korat	54	48	22.3	18.4	0.888889	20.35
1297	Korat	93	126	28.2	25.6	1.35484	26.9
1298	Korat	55	63	25.2	22.6	1.14545	23.9
1299	Korat	64	70	23.6	19.7	1.09375	21.65
1300	Korat	132	171	29.3	25.3	1.29545	27.3
1301	Korat	68	89	23.4	21.9	1.30882	22.65
1302	Korat	38	54	29.5	25.8	1.42105	27.65
1303	Korat	95	123	31.5	29.1	1.29474	30.3
1304	Korat	26	34	19.9	19.1	1.30769	19.5
1305	Korat	63	77	25.3	22.1	1.22222	23.7
1306	Korat	59	80	23.4	21.1	1.35593	22.25
1307	Korat	26	36	23.1	20.8	1.38462	21.95
1308	Korat	73	101	21.1	24.2	1.38356	22.65
1309	Korat	76	91	27.3	27.3	1.19737	27.3
1310	Korat	35	39	22.1	25.7	1.11429	23.9
1311	Kurilian Bobtail	23	25	21.3	23.4	1.08696	22.35
1312	Kurilian Bobtail	31	46	24.6	24.7	1.48387	24.65
1313	Kurilian Bobtail	34	47	26.5	25.1	1.38235	25.8
1314	Kurilian Bobtail	22	30	20.5	19.4	1.36364	19.95
1315	Kurilian Bobtail	44	68	30	30.5	1.54545	30.25
1316	Kurilian Bobtail	23	25	23.6	25	1.08696	24.3
1317	Kurilian Bobtail	109	147	27.6	27.1	1.34862	27.35
1318	Kurilian Bobtail	18	21	14.9	15.9	1.16667	15.4
1319	Kurilian Bobtail	25	30	15.9	16.6	1.2	16.25
1320	Kurilian Bobtail	19	27	20.5	17.3	1.42105	18.9
1321	Kurilian Bobtail	11	16	21.8	18.4	1.45455	20.1
1322	Kurilian Bobtail	13	14	23.9	21.8	1.07692	22.85
1323	Kurilian Bobtail	26	36	25.4	23.1	1.38462	24.25
1324	Kurilian Bobtail	65	78	26.1	24.6	1.2	25.35
1325	Kurilian Bobtail	31	41	26.5	22.9	1.32258	24.7
1326	Kurilian Bobtail	46	64	22.3	25.8	1.3913	24.05
1327	Kurilian Bobtail	27	42	28.4	23.7	1.55556	26.05
1328	Kurilian Bobtail	36	33	12.5	16.9	0.916667	14.7
1329	Kurilian Bobtail	24	29	26.5	25.2	1.20833	25.85
1330	Kurilian Bobtail	29	43	28.6	26.5	1.48276	27.55
1331	Kurilian Bobtail	13	17	26.5	24.4	1.30769	25.45
1332	Kurilian Bobtail	19	24	21.8	17.3	1.26316	19.55
1333	Kurilian Bobtail	54	58	20.3	17.5	1.07407	18.9
1334	Kurilian Bobtail	42	55	21.8	17.9	1.30952	19.85
1335	Kurilian Bobtail	21	26	26.5	23.1	1.2381	24.8
1336	Kurilian Bobtail	27	27	19.21	17.6	1	18.405
1337	Kurilian Bobtail	21	27	21.8	18.4	1.28571	20.1
1338	Kurilian Bobtail	34	49	21.4	22.4	1.44118	21.9
1339	Kurilian Bobtail	28	33	24.4	24.4	1.17857	24.4
1340	Kurilian Bobtail	68	87	28.2	26.5	1.27941	27.35
1341	Kurilian Bobtail	23	23	23.6	23.6	1	23.6
1342	Kurilian Bobtail	28	39	28.4	27.5	1.39286	27.95
1343	Kurilian Bobtail	30	30	19.1	21.2	1	20.15
1344	Kurilian Bobtail	28	28	16.3	15.5	1	15.9
1345	LaPerm	20	25	24.7	21	1.25	22.85
1346	LaPerm	31	44	18.9	17.7	1.41935	18.3
1347	LaPerm	21	25	20.5	20.2	1.19048	20.35
1348	LaPerm	16	25	12.9	12.9	1.5625	12.9
1349	LaPerm	19	24	18.4	19.6	1.26316	19
1350	LaPerm	22	26	18.4	19.4	1.18182	18.9
1351	LaPerm	22	22	20.5	20.5	1	20.5
1352	LaPerm	24	22	17.3	19.4	0.916667	18.35
1353	LaPerm	37	35	17.8	17.1	0.945946	17.45
1354	LaPerm	18	26	27.8	26.5	1.44444	27.15
1355	LaPerm	21	28	20.5	16.3	1.33333	18.4
1356	LaPerm	21	25	23.9	22.8	1.19048	23.35
1357	LaPerm	26	20	26.5	26.5	0.769231	26.5
1358	LaPerm	32	30	16.9	19.9	0.9375	18.4
1359	LaPerm	28	35	27.5	26.5	1.25	27
1360	LaPerm	28	34	24.4	24.2	1.21429	24.3
1361	LaPerm	218	265	19.3	18.7	1.2156	19
1362	LaPerm	27	33	20.5	24.6	1.22222	22.55
1363	LaPerm	25	37	28.6	26.5	1.48	27.55
1364	LaPerm	15	19	12.9	12.9	1.26667	12.9
1365	LaPerm	47	50	21.8	22.3	1.06383	22.05
1366	LaPerm	33	42	29.9	25.7	1.27273	27.8
1367	LaPerm	100	125	16.4	17.5	1.25	16.95
1368	LaPerm	17	22	23.9	28	1.29412	25.95
1369	LaPerm	42	52	22	20.3	1.2381	21.15
1370	LaPerm	64	68	24.4	21.1	1.0625	22.75
1371	LaPerm	70	72	21.1	20.4	1.02857	20.75
1372	LaPerm	58	77	20	23.9	1.32759	21.95
1373	LaPerm	23	31	28	23.6	1.34783	25.8
1374	LaPerm	48	66	22.8	22.8	1.375	22.8
1375	LaPerm	36	46	27.3	23.9	1.27778	25.6
1376	LaPerm	27	34	18.4	22.2	1.25926	20.3
1377	Lykoi	42	40	19	19.6	0.952381	19.3
1378	Lykoi	37	43	22.7	24.1	1.16216	23.4
1379	Lykoi	40	50	26.5	25.1	1.25	25.8
1380	Lykoi	37	36	22.1	22.9	0.972973	22.5
1381	Lykoi	36	37	14	18.9	1.02778	16.45
1382	Lykoi	20	23	23.6	20.5	1.15	22.05
1383	Lykoi	39	47	21	26.5	1.20513	23.75
1384	Lykoi	33	45	30.2	31.3	1.36364	30.75
1385	Lykoi	252	325	26	22.9	1.28968	24.45
1386	Lykoi	77	86	17.7	16.4	1.11688	17.05
1387	Lykoi	39	46	27.4	29.2	1.17949	28.3
1388	Lykoi	96	128	32.3	28.1	1.33333	30.2
1389	Lykoi	78	90	21.4	20.3	1.15385	20.85
1390	Lykoi	78	113	28	28.5	1.44872	28.25
1391	Lykoi	36	39	24.6	18.4	1.08333	21.5
1392	Lykoi	126	119	22.3	22.3	0.944444	22.3
1393	Lykoi	29	35	24.6	23.4	1.2069	24
1394	Lykoi	120	155	22.5	20.4	1.29167	21.45
1395	Lykoi	17	22	26.5	23.1	1.29412	24.8
1396	Lykoi	23	25	25	25.2	1.08696	25.1
1397	Lykoi	15	7	24.4	26.5	0.466667	25.45
1398	Lykoi	37	45	29.9	29.2	1.21622	29.55
1399	Maine Coon	121	128	22.6	24.4	1.05785	23.5
1400	Maine Coon	166	211	16.6	17.5	1.27108	17.05
1401	Maine Coon	133	154	26.3	27.4	1.15789	26.85
1402	Maine Coon	118	124	25.8	24.9	1.05085	25.35
1403	Maine Coon	101	123	25	24.6	1.21782	24.8
1404	Maine Coon	182	218	25.4	24	1.1978	24.7
1405	Maine Coon	91	112	33.4	27.2	1.23077	30.3
1406	Maine Coon	152	198	26.9	27.8	1.30263	27.35
1407	Maine Coon	19	17	16.3	21.8	0.894737	19.05
1408	Maine Coon	19	22	21.8	21	1.15789	21.4
1409	Maine Coon	22	21	22.3	23.6	0.954545	22.95
1410	Maine Coon	16	22	24.7	21	1.375	22.85
1411	Maine Coon	19	19	18.4	21	1	19.7
1412	Maine Coon	26	28	28.4	16.3	1.07692	22.35
1413	Maine Coon	19	20	22.6	18.4	1.05263	20.5
1414	Maine Coon	21	22	19.6	19.6	1.04762	19.6
1415	Maine Coon	18	20	23.6	23.6	1.11111	23.6
1416	Maine Coon	21	21	29.7	25	1	27.35
1417	Maine Coon	18	16	21	22.6	0.888889	21.8
1418	Maine Coon	18	20	19.6	19.6	1.11111	19.6
1419	Maine Coon	15	19	19.6	19.6	1.26667	19.6
1420	Maine Coon	15	16	14	19.9	1.06667	16.95
1421	Maine Coon	27	25	17.3	17.3	0.925926	17.3
1422	Maine Coon	16	18	23.1	26.5	1.125	24.8
1423	Maine Coon	20	24	18.4	20.5	1.2	19.45
1424	Maine Coon	16	22	19.6	19.6	1.375	19.6
1425	Maine Coon	28	30	17.6	22.8	1.07143	20.2
1426	Maine Coon	18	22	14.9	15.9	1.22222	15.4
1427	Maine Coon	16	17	21	21	1.0625	21
1428	Maine Coon	18	19	19.6	23.1	1.05556	21.35
1429	Maine Coon	18	20	24.7	24.7	1.11111	24.7
1430	Maine Coon	19	26	25	28	1.36842	26.5
1431	Maine Coon	17	18	21	26.5	1.05882	23.75
1432	Maine Coon	23	24	16.3	15.5	1.04348	15.9
1433	Maine Coon	18	20	21	18.4	1.11111	19.7
1434	Maine Coon	31	32	27.6	30.4	1.03226	29
1435	Maine Coon	19	20	28.3	26.5	1.05263	27.4
1436	Maine Coon	31	34	27.6	23.9	1.09677	25.75
1437	Maine Coon	24	25	19.4	25	1.04167	22.2
1438	Maine Coon	21	23	24.7	21.8	1.09524	23.25
1439	Maine Coon	18	19	19.9	18.4	1.05556	19.15
1440	Maine Coon	18	19	28.3	23.1	1.05556	25.7
1441	Maine Coon	17	20	23.1	19.6	1.17647	21.35
1442	Maine Coon	21	28	24.7	24.7	1.33333	24.7
1443	Maine Coon	37	35	19.9	19.1	0.945946	19.5
1444	Maine Coon	20	22	23.1	26.5	1.1	24.8
1445	Maine Coon	15	19	26.5	24.4	1.26667	25.45
1446	Maine Coon	29	33	19.2	22.8	1.13793	21
1447	Maine Coon	14	17	26.5	26.5	1.21429	26.5
1448	Maine Coon	33	44	25.5	23.1	1.33333	24.3
1449	Manx	23	26	21.8	20.5	1.13043	21.15
1450	Manx	29	31	22.2	25.5	1.06897	23.85
1451	Manx	34	25	18.4	22.2	0.735294	20.3
1452	Manx	30	33	23.7	24.2	1.1	23.95
1453	Manx	28	30	22.8	21.8	1.07143	22.3
1454	Manx	22	27	25.2	23.9	1.22727	24.55
1455	Manx	25	24	26.5	26.5	0.96	26.5
1456	Manx	15	14	21	22.6	0.933333	21.8
1457	Manx	35	33	23.4	26.5	0.942857	24.95
1458	Manx	24	24	22.3	21.2	1	21.75
1459	Manx	27	28	15.5	16.6	1.03704	16.05
1460	Manx	26	23	22.3	17.5	0.884615	19.9
1461	Manx	28	26	25.3	20.2	0.928571	22.75
1462	Manx	26	24	13.2	17.3	0.923077	15.25
1463	Manx	27	36	14.7	16.3	1.33333	15.5
1464	Manx	23	28	29.3	25.2	1.21739	27.25
1465	Manx	23	29	16.3	19.4	1.26087	17.85
1466	Manx	28	30	20.2	17.5	1.07143	18.85
1467	Manx	16	14	21	21	0.875	21
1468	Manx	28	27	22.8	25.2	0.964286	24
1469	Manx	26	28	24.2	27.8	1.07692	26
1470	Manx	18	21	28	23.1	1.16667	25.55
1471	Manx	21	21	26.5	28.3	1	27.4
1472	Manx	21	20	28	25	0.952381	26.5
1473	Manx	31	38	26.5	26.5	1.22581	26.5
1474	Manx	20	25	18.4	21	1.25	19.7
1475	Manx	20	20	18.4	19.4	1	18.9
1476	Manx	20	22	23.1	18.4	1.1	20.75
1477	Manx	21	26	11.3	14.9	1.2381	13.1
1478	Manx	38	31	17.7	17.1	0.815789	17.4
1479	Manx	24	22	17.6	17.6	0.916667	17.6
1480	Manx	23	21	23.6	25.2	0.913043	24.4
1481	Manx	45	54	19.6	22.7	1.2	21.15
1482	Manx	52	56	30	25.9	1.07692	27.95
1483	Manx	17	23	30.2	26.5	1.35294	28.35
1484	Manx	23	24	21.8	18.4	1.04348	20.1
1485	Manx	38	37	21	21.4	0.973684	21.2
1486	Manx	24	24	11.3	12.5	1	11.9
1487	Manx	26	36	30.9	30.6	1.38462	30.75
1488	Manx	35	38	24.7	24.6	1.08571	24.65
1489	Manx	23	20	29.3	27.8	0.869565	28.55
1490	Manx	14	14	24.7	26.5	1	25.6
1491	Manx	25	24	27.8	24.2	0.96	26
1492	Manx	24	26	22.3	19.4	1.08333	20.85
1493	Manx	32	49	15.4	22.2	1.53125	18.8
1494	Manx	67	81	23.3	23.5	1.20896	23.4
1495	Manx	45	56	33.2	29.5	1.24444	31.35
1496	Manx	66	77	29.4	27.4	1.16667	28.4
1497	Manx	102	126	22.5	28.5	1.23529	25.5
1498	Manx	35	41	22.9	24.1	1.17143	23.5
1499	Minuet	337	398	27.2	24.8	1.18101	26
1500	Minuet	196	183	25.4	27.3	0.933673	26.35
1501	Minuet	216	142	19.3	19.1	0.657407	19.2
1502	Minuet	21	15	22.3	19.4	0.714286	20.85
1503	Minuet	91	69	20	21.9	0.758242	20.95
1504	Minuet	29	24	24.4	21.3	0.827586	22.85
1505	Minuet	21	19	14	17.3	0.904762	15.65
1506	Minuet	28	21	17.6	20.2	0.75	18.9
1507	Minuet	23	20	23.1	25.3	0.869565	24.2
1508	Minuet	34	28	24.7	24.7	0.823529	24.7
1509	Minuet	17	16	18.4	14.9	0.941176	16.65
1510	Minuet	69	82	23.6	21.6	1.18841	22.6
1511	Minuet	25	25	21.3	20.5	1	20.9
1512	Minuet	14	11	21.8	23.1	0.785714	22.45
1513	Minuet	26	26	18.4	18.4	1	18.4
1514	Minuet	61	64	25.4	22.2	1.04918	23.8
1515	Minuet	31	29	22.6	21.8	0.935484	22.2
1516	Minuet	54	56	21.5	22.6	1.03704	22.05
1517	Minuet	81	86	25.7	25	1.06173	25.35
1518	Minuet	14	16	22.6	23.1	1.14286	22.85
1519	Minuet	36	38	22.4	22.9	1.05556	22.65
1520	Minuet	51	45	15.5	16.3	0.882353	15.9
1521	Minuet	50	49	21.2	18.4	0.98	19.8
1522	Minuet	30	35	24.7	22.1	1.16667	23.4
1523	Minuet	17	17	14.9	17.3	1	16.1
1524	Minuet	21	17	14	17.3	0.809524	15.65
1525	Minuet	36	45	19.1	18.4	1.25	18.75
1526	Minuet	25	27	14.7	11.8	1.08	13.25
1527	Minuet	49	64	23.7	27.1	1.30612	25.4
1528	Minuet	56	58	20	17.7	1.03571	18.85
1529	Minuet	26	28	19.7	19	1.07692	19.35
1530	Munchkin	105	103	25.9	26.2	0.980952	26.05
1531	Munchkin	223	188	22	24.8	0.843049	23.4
1532	Munchkin	138	172	27.6	29.3	1.24638	28.45
1533	Munchkin	170	181	30.1	26.5	1.06471	28.3
1534	Munchkin	151	148	21.5	20.5	0.980132	21
1535	Munchkin	149	156	28.3	23.2	1.04698	25.75
1536	Munchkin	134	162	29.6	25.9	1.20896	27.75
1537	Munchkin	149	136	27.1	26.1	0.912752	26.6
1538	Munchkin	176	192	24.7	23.7	1.09091	24.2
1539	Munchkin	134	151	21.2	20.4	1.12687	20.8
1540	Munchkin	103	130	24.7	22.2	1.26214	23.45
1541	Munchkin	139	147	19.7	19.2	1.05755	19.45
1542	Munchkin	183	166	21	22	0.907104	21.5
1543	Munchkin	155	129	24	28.4	0.832258	26.2
1544	Munchkin	68	68	21.8	18.7	1	20.25
1545	Munchkin	188	180	23	22.8	0.957447	22.9
1546	Munchkin	131	149	24.8	26.3	1.1374	25.55
1547	Munchkin	153	158	24.4	27	1.03268	25.7
1548	Munchkin	171	168	23.1	27.2	0.982456	25.15
1549	Munchkin	163	208	24.6	24.1	1.27607	24.35
1550	Munchkin	36	31	17.7	14	0.861111	15.85
1551	Munchkin	23	20	19.4	15.5	0.869565	17.45
1552	Munchkin	33	43	18.4	20.5	1.30303	19.45
1553	Munchkin	36	41	21.4	24.6	1.13889	23
1554	Munchkin	28	31	27.5	26.5	1.10714	27
1555	Munchkin	18	19	19.6	18.4	1.05556	19
1556	Munchkin	39	39	24.3	22.7	1	23.5
1557	Munchkin	50	49	19.8	18.4	0.98	19.1
1558	Munchkin	23	27	19.6	19.6	1.17391	19.6
1559	Munchkin	68	78	24.2	25.1	1.14706	24.65
1560	Munchkin	49	44	18.4	19.3	0.897959	18.85
1561	Munchkin	32	36	22.9	22.1	1.125	22.5
1562	Munchkin	29	34	19.9	19.9	1.17241	19.9
1563	Munchkin	30	32	25.6	23.7	1.06667	24.65
1564	Nebelung	53	63	25.2	21.3	1.18868	23.25
1565	Nebelung	37	50	16.9	16.5	1.35135	16.7
1566	Nebelung	26	33	25.5	27.7	1.26923	26.6
1567	Nebelung	18	20	22.6	24.7	1.11111	23.65
1568	Nebelung	60	77	28.8	26.5	1.28333	27.65
1569	Nebelung	31	36	25.4	22.2	1.16129	23.8
1570	Nebelung	66	65	21.1	22	0.984848	21.55
1571	Nebelung	42	49	20.2	21.5	1.16667	20.85
1572	Nebelung	147	151	26.3	27.8	1.02721	27.05
1573	Nebelung	42	53	27.2	23.8	1.2619	25.5
1574	Nebelung	86	99	18.1	22.1	1.15116	20.1
1575	Nebelung	203	271	26.1	27.5	1.33498	26.8
1576	Nebelung	133	178	30.4	25.3	1.33835	27.85
1577	Nebelung	493	609	21.7	24.5	1.23529	23.1
1578	Nebelung	53	72	24.3	25.4	1.35849	24.85
1579	Nebelung	22	29	23.6	26.5	1.31818	25.05
1580	Nebelung	17	26	22.3	21	1.52941	21.65
1581	Nebelung	49	62	23.1	21.1	1.26531	22.1
1582	Nebelung	38	49	21.1	20.5	1.28947	20.8
1583	Nebelung	47	56	25.2	23.1	1.19149	24.15
1584	Nebelung	32	47	19.7	20.5	1.46875	20.1
1585	Nebelung	158	190	17.6	21.6	1.20253	19.6
1586	Nebelung	54	68	21.3	21.8	1.25926	21.55
1587	Nebelung	23	31	23.9	27.8	1.34783	25.85
1588	Nebelung	23	28	22.3	19.4	1.21739	20.85
1589	Nebelung	70	104	29.5	30.7	1.48571	30.1
1590	Norwegian Forestcat	117	128	25.9	25.2	1.09402	25.55
1591	Norwegian Forestcat	190	248	31.2	30.9	1.30526	31.05
1592	Norwegian Forestcat	116	183	26.1	29.2	1.57759	27.65
1593	Norwegian Forestcat	138	168	27.6	25.6	1.21739	26.6
1594	Norwegian Forestcat	110	147	29.5	34.6	1.33636	32.05
1595	Norwegian Forestcat	41	51	25.8	29.3	1.2439	27.55
1596	Norwegian Forestcat	177	237	26.5	29.1	1.33898	27.8
1597	Norwegian Forestcat	119	142	30.7	29.3	1.19328	30
1598	Norwegian Forestcat	134	164	23.6	23.3	1.22388	23.45
1599	Norwegian Forestcat	114	172	28	30.3	1.50877	29.15
1600	Norwegian Forestcat	103	122	22.1	22.3	1.18447	22.2
1601	Norwegian Forestcat	117	129	26	29.4	1.10256	27.7
1602	Norwegian Forestcat	121	126	22.1	22.3	1.04132	22.2
1603	Norwegian Forestcat	31	32	22.2	21.3	1.03226	21.75
1604	Norwegian Forestcat	37	43	24.7	21.4	1.16216	23.05
1605	Norwegian Forestcat	26	27	19.4	25.3	1.03846	22.35
1606	Norwegian Forestcat	23	25	25.3	26.5	1.08696	25.9
1607	Norwegian Forestcat	17	20	28.3	28.3	1.17647	28.3
1608	Norwegian Forestcat	20	25	26.5	29.3	1.25	27.9
1609	Norwegian Forestcat	22	26	20.5	20.5	1.18182	20.5
1610	Norwegian Forestcat	21	22	21.8	25	1.04762	23.4
1611	Norwegian Forestcat	14	17	34.9	30.2	1.21429	32.55
1612	Norwegian Forestcat	17	17	23.1	28.3	1	25.7
1613	Norwegian Forestcat	20	19	21.8	23.6	0.95	22.7
1614	Norwegian Forestcat	18	24	20.2	26.5	1.33333	23.35
1615	Norwegian Forestcat	44	52	24.3	21.8	1.18182	23.05
1616	Norwegian Forestcat	16	16	18.4	19.6	1	19
1617	Norwegian Forestcat	15	17	23.1	23.1	1.13333	23.1
1618	Norwegian Forestcat	16	18	22.6	26.5	1.125	24.55
1619	Norwegian Forestcat	18	25	18.4	23.9	1.38889	21.15
1620	Norwegian Forestcat	16	17	24.7	24.7	1.0625	24.7
1621	Norwegian Forestcat	19	22	19.6	19.4	1.15789	19.5
1622	Norwegian Forestcat	127	132	19.2	23.1	1.03937	21.15
1623	Norwegian Forestcat	21	24	22.3	23.1	1.14286	22.7
1624	Norwegian Forestcat	39	43	26.5	20.7	1.10256	23.6
1625	Norwegian Forestcat	22	24	22.3	28	1.09091	25.15
1626	Norwegian Forestcat	20	24	28.3	28	1.2	28.15
1627	Norwegian Forestcat	25	32	25.4	26.5	1.28	25.95
1628	Norwegian Forestcat	28	34	26.5	21.8	1.21429	24.15
1629	Norwegian Forestcat	28	33	27.6	29.7	1.17857	28.65
1630	Norwegian Forestcat	82	99	25.2	22.1	1.20732	23.65
1631	Norwegian Forestcat	25	33	27.8	25.2	1.32	26.5
1632	Norwegian Forestcat	22	33	26.5	27.7	1.5	27.1
1633	Norwegian Forestcat	50	73	22.3	26	1.46	24.15
1634	Norwegian Forestcat	28	36	23.1	19.1	1.28571	21.1
1635	Norwegian Forestcat	29	35	25.3	27.7	1.2069	26.5
1636	Norwegian Forestcat	15	22	24.4	30.9	1.46667	27.65
1637	Norwegian Forestcat	27	35	25.6	27.5	1.2963	26.55
1638	Norwegian Forestcat	18	24	26.5	26.5	1.33333	26.5
1639	Norwegian Forestcat	31	35	25.3	19.7	1.12903	22.5
1640	Ocicat	275	296	25.3	21.3	1.07636	23.3
1641	Ocicat	46	41	15.4	17.1	0.891304	16.25
1642	Ocicat	21	20	18.4	22.6	0.952381	20.5
1643	Ocicat	21	24	17.1	17.1	1.14286	17.1
1644	Ocicat	26	34	22.8	26.5	1.30769	24.65
1645	Ocicat	24	26	19.4	16.3	1.08333	17.85
1646	Ocicat	16	21	24.4	26.5	1.3125	25.45
1647	Ocicat	20	23	26.5	24.7	1.15	25.6
1648	Ocicat	22	28	22.3	21.8	1.27273	22.05
1649	Ocicat	21	27	26.5	23.6	1.28571	25.05
1650	Ocicat	21	22	19.6	23.1	1.04762	21.35
1651	Ocicat	15	18	18.4	22.6	1.2	20.5
1652	Ocicat	21	22	19.6	17.3	1.04762	18.45
1653	Ocicat	36	36	19.7	19.7	1	19.7
1654	Ocicat	22	28	25	29.3	1.27273	27.15
1655	Ocicat	15	17	24.4	26.5	1.13333	25.45
1656	Ocicat	19	19	19.6	18.4	1	19
1657	Ocicat	20	25	19.6	23.1	1.25	21.35
1658	Ocicat	31	36	24.6	20.8	1.16129	22.7
1659	Ocicat	41	49	23.4	21.1	1.19512	22.25
1660	Ocicat	46	61	22.9	24.4	1.32609	23.65
1661	Ocicat	20	30	23.9	26.5	1.5	25.2
1662	Ocicat	31	42	25.6	23.7	1.35484	24.65
1663	Ocicat	24	26	20.2	19.9	1.08333	20.05
1664	Ocicat	16	16	18.4	22.6	1	20.5
1665	Ocicat	16	18	21	19.6	1.125	20.3
1666	Ocicat	12	17	21.8	24.4	1.41667	23.1
1667	Ocicat	62	71	21.5	19.1	1.14516	20.3
1668	Ocicat	19	22	25	26.5	1.15789	25.75
1669	Ocicat	12	14	30.9	34.9	1.16667	32.9
1670	Ocicat	13	13	23.9	21.8	1	22.85
1671	Ocicat	13	15	26.5	26.5	1.15385	26.5
1672	Ocicat	107	115	16.9	17	1.07477	16.95
1673	Ocicat	23	32	20.8	26.5	1.3913	23.65
1674	Ocicat	15	23	24.4	24.4	1.53333	24.4
1675	Ocicat	54	71	24.5	27.1	1.31481	25.8
1676	Ocicat	28	34	21.2	24.2	1.21429	22.7
1677	Ocicat	16	19	21	18.4	1.1875	19.7
1678	Ocicat	29	32	17.6	20.2	1.10345	18.9
1679	Ocicat	83	111	27.7	25	1.33735	26.35
1680	Ocicat	14	18	21.8	21.8	1.28571	21.8
1681	Ocicat	21	22	17.3	21.8	1.04762	19.55
1682	Ocicat	33	40	21	23.4	1.21212	22.2
1683	Ocicat	61	74	29.1	28.7	1.21311	28.9
1684	Ocicat	30	36	27.7	24.2	1.2	25.95
1685	Ocicat	54	62	27.6	27.6	1.14815	27.6
1686	Ocicat	55	77	32.2	34.9	1.4	33.55
1687	Ocicat	18	22	28	25	1.22222	26.5
1688	Ocicat	103	149	27.6	30.6	1.4466	29.1
1689	Ocicat	206	237	23.3	24.2	1.15049	23.75
1690	Oriental	40	70	23.9	32.7	1.75	28.3
1691	Oriental	18	30	18.4	28.3	1.66667	23.35
1692	Oriental	16	23	17.1	21.8	1.4375	19.45
1693	Oriental	14	17	22.6	18.4	1.21429	20.5
1694	Oriental	25	35	19.2	20.5	1.4	19.85
1695	Oriental	24	38	25.3	30	1.58333	27.65
1696	Oriental	17	26	26.5	25	1.52941	25.75
1697	Oriental	15	29	32	29.7	1.93333	30.85
1698	Oriental	15	20	19.9	16.6	1.33333	18.25
1699	Oriental	15	20	22.6	28.6	1.33333	25.6
1700	Oriental	25	31	19.4	23.6	1.24	21.5
1701	Oriental	20	25	19.6	15.9	1.25	17.75
1702	Oriental	19	24	19.4	21.8	1.26316	20.6
1703	Oriental	20	32	21.2	23.9	1.6	22.55
1704	Oriental	22	30	19.4	19.4	1.36364	19.4
1705	Oriental	15	23	24.7	26.5	1.53333	25.6
1706	Oriental	17	28	21.8	28.3	1.64706	25.05
1707	Oriental	84	120	20.3	22.4	1.42857	21.35
1708	Oriental	18	29	22.3	25	1.61111	23.65
1709	Oriental	14	20	17.1	18.4	1.42857	17.75
1710	Oriental	17	26	23.6	21.8	1.52941	22.7
1711	Oriental	39	59	25.9	26.5	1.51282	26.2
1712	Oriental	44	63	19.3	21.4	1.43182	20.35
1713	Oriental	11	18	16.6	24.4	1.63636	20.5
1714	Oriental	18	28	25	25	1.55556	25
1715	Oriental	14	21	17.1	22.6	1.5	19.85
1716	Oriental	19	32	28.3	25	1.68421	26.65
1717	Oriental	19	25	20.5	17.3	1.31579	18.9
1718	Oriental	14	20	22.6	17.1	1.42857	19.85
1719	Oriental	13	19	21	26.5	1.46154	23.75
1720	Oriental	17	26	19.6	18.4	1.52941	19
1721	Oriental	15	20	18.4	17.1	1.33333	17.75
1722	Oriental	14	24	21.8	26.5	1.71429	24.15
1723	Oriental	17	24	21	24.4	1.41176	22.7
1724	Oriental	18	25	21.8	18.4	1.38889	20.1
1725	Oriental	41	59	19.5	18.4	1.43902	18.95
1726	Oriental	18	27	18.4	20.5	1.5	19.45
1727	Oriental	18	26	19.6	18.4	1.44444	19
1728	Oriental	33	54	19	20.3	1.63636	19.65
1729	Oriental	14	22	21	21	1.57143	21
1730	Oriental	36	50	16.5	20.1	1.38889	18.3
1731	Oriental	33	52	19.6	19	1.57576	19.3
1732	Oriental	20	26	20.52	21.8	1.3	21.16
1733	Oriental	17	21	21	19.9	1.23529	20.45
1734	Oriental	19	24	14	15.9	1.26316	14.95
1735	Oriental	16	26	28.6	26.5	1.625	27.55
1736	Oriental	13	18	22.6	22.6	1.38462	22.6
1737	Oriental	32	51	21	26.5	1.59375	23.75
1738	Oriental	27	40	23.1	25.4	1.48148	24.25
1739	Oriental	37	57	34.6	29.3	1.54054	31.95
1740	Persian	185	197	21.5	20.7	1.06486	21.1
1741	Persian	118	91	17.7	18.2	0.771186	17.95
1742	Persian	132	133	25	25.3	1.00758	25.15
1743	Persian	129	129	20.3	22.2	1	21.25
1744	Persian	149	141	26.9	27.5	0.946309	27.2
1745	Persian	218	143	19.4	22.5	0.655963	20.95
1746	Persian	35	12	16.2	14	0.342857	15.1
1747	Persian	50	21	19.3	17.4	0.42	18.35
1748	Persian	44	22	7.9	11.8	0.5	9.85
1749	Persian	30	12	8.9	8.9	0.4	8.9
1750	Persian	25	14	10.7	13.3	0.56	12
1751	Persian	32	18	2.4	11.3	0.5625	6.85
1752	Persian	29	15	11.7	11.7	0.517241	11.7
1753	Persian	29	8	18.4	14	0.275862	16.2
1754	Persian	44	16	14.5	16.5	0.363636	15.5
1755	Persian	36	17	11.3	9	0.472222	10.15
1756	Persian	42	19	14	12	0.452381	13
1757	Persian	40	25	13.3	11.8	0.625	12.55
1758	Persian	29	14	11.8	10.3	0.482759	11.05
1759	Persian	47	22	12	12.5	0.468085	12.25
1760	Persian	32	11	10.7	8.5	0.34375	9.6
1761	Persian	36	16	12.9	11.6	0.444444	12.25
1762	Persian	48	20	6.7	9.4	0.416667	8.05
1763	Persian	51	21	10.4	12.5	0.411765	11.45
1764	Persian	52	20	16.1	15.7	0.384615	15.9
1765	Persian	43	18	11.6	11.6	0.418605	11.6
1766	Persian	47	18	9.46	12	0.382979	10.73
1767	Persian	42	23	10.6	10.9	0.547619	10.75
1768	Persian	55	20	12.7	14.9	0.363636	13.8
1769	Persian	36	16	17.8	17.2	0.444444	17.5
1770	Persian	49	26	20.7	16.8	0.530612	18.75
1771	Persian	43	18	19	16.1	0.418605	17.55
1772	Persian	41	20	13.5	16.6	0.487805	15.05
1773	Persian	51	17	12.5	13.6	0.333333	13.05
1774	Persian	42	22	15.4	14	0.52381	14.7
1775	Persian	35	13	8.4	9.8	0.371429	9.1
1776	Persian	38	12	9.8	9.8	0.315789	9.8
1777	Persian	36	11	15	12	0.305556	13.5
1778	Persian	41	14	19.1	14.6	0.341463	16.85
1779	Persian	79	23	18	13.7	0.291139	15.85
1780	Persian	31	13	11.3	10.3	0.419355	10.8
1781	Persian	41	19	13.5	14.9	0.463415	14.2
1782	Persian	39	16	15.2	17.3	0.410256	16.25
1783	Persian	34	26	16.8	15.2	0.764706	16
1784	Persian	34	29	18.9	11	0.852941	14.95
1785	Persian	47	14	11.3	11.3	0.297872	11.3
1786	Persian	54	22	10.4	14.3	0.407407	12.35
1787	Persian	52	25	11.8	11.3	0.480769	11.55
1788	Persian	48	20	18.4	16.9	0.416667	17.65
1789	Persian	48	21	15.2	15.7	0.4375	15.45
1790	Peterbald	105	137	20	24.1	1.30476	22.05
1791	Peterbald	22	28	8.1	11.3	1.27273	9.7
1792	Peterbald	54	71	13.2	13.5	1.31481	13.35
1793	Peterbald	30	36	12.5	12.5	1.2	12.5
1794	Peterbald	56	72	22.1	20.5	1.28571	21.3
1795	Peterbald	18	24	21.8	21	1.33333	21.4
1796	Peterbald	25	24	17.3	18.4	0.96	17.85
1797	Peterbald	42	56	27.2	26.5	1.33333	26.85
1798	Peterbald	31	37	23.1	18.4	1.19355	20.75
1799	Peterbald	51	78	31.2	26.5	1.52941	28.85
1800	Peterbald	45	74	19.7	22.7	1.64444	21.2
1801	Peterbald	70	89	28.7	27.8	1.27143	28.25
1802	Peterbald	20	28	30.9	30.9	1.4	30.9
1803	Peterbald	61	81	21.8	30.9	1.32787	26.35
1804	Peterbald	34	48	19.7	17.1	1.41176	18.4
1805	Peterbald	24	39	27.7	31.4	1.625	29.55
1806	Peterbald	19	29	24.7	24.7	1.52632	24.7
1807	Peterbald	21	27	23.9	23.9	1.28571	23.9
1808	Peterbald	38	49	21.1	19	1.28947	20.05
1809	Peterbald	22	30	25.2	30.9	1.36364	28.05
1810	Peterbald	69	79	13.7	20.6	1.14493	17.15
1811	Peterbald	51	82	28.9	23.8	1.60784	26.35
1812	Peterbald	43	51	14	14.5	1.18605	14.25
1813	Peterbald	78	101	23.4	21.5	1.29487	22.45
1814	Peterbald	26	30	22.3	19.6	1.15385	20.95
1815	Peterbald	50	77	22.9	22.1	1.54	22.5
1816	Peterbald	67	105	24.8	28.9	1.56716	26.85
1817	Peterbald	53	73	22.8	23.8	1.37736	23.3
1818	Peterbald	40	55	22.3	24.1	1.375	23.2
1819	Peterbald	53	73	23.1	20.7	1.37736	21.9
1820	Peterbald	49	88	32.6	30.4	1.79592	31.5
1821	Peterbald	51	66	21.8	23.3	1.29412	22.55
1822	Pixiebob	25	36	12.9	16.6	1.44	14.75
1823	Pixiebob	28	29	14	18.4	1.03571	16.2
1824	Pixiebob	27	34	25.3	30.4	1.25926	27.85
1825	Pixiebob	34	47	22.1	21	1.38235	21.55
1826	Pixiebob	18	21	23.6	20.5	1.16667	22.05
1827	Pixiebob	18	26	20.5	18.4	1.44444	19.45
1828	Pixiebob	25	26	17.5	22.3	1.04	19.9
1829	Pixiebob	21	22	30.9	26.5	1.04762	28.7
1830	Pixiebob	37	48	28.6	25.8	1.2973	27.2
1831	Pixiebob	35	42	23.7	19	1.2	21.35
1832	Pixiebob	66	86	21.1	21.8	1.30303	21.45
1833	Pixiebob	35	48	25	25.8	1.37143	25.4
1834	Pixiebob	82	99	23.1	21.2	1.20732	22.15
1835	Pixiebob	20	21	21	26.5	1.05	23.75
1836	Pixiebob	16	20	21.8	21.8	1.25	21.8
1837	Pixiebob	26	28	24.2	23.1	1.07692	23.65
1838	Pixiebob	33	42	24.6	27.4	1.27273	26
1839	Pixiebob	38	52	25.9	24.6	1.36842	25.25
1840	Pixiebob	40	44	21.8	20.7	1.1	21.25
1841	Pixiebob	13	14	26.5	23.9	1.07692	25.2
1842	Pixiebob	36	44	25.7	27.4	1.22222	26.55
1843	Pixiebob	50	64	18	21.8	1.28	19.9
1844	Pixiebob	46	52	18.8	21.8	1.13043	20.3
1845	Pixiebob	23	26	21.5	23.1	1.13043	22.3
1846	Pixiebob	34	44	25.5	25.5	1.29412	25.5
1847	Pixiebob	27	35	23.4	25.5	1.2963	24.45
1848	Pixiebob	41	57	29.1	29.2	1.39024	29.15
1849	RagaMuffin	172	197	26.5	25.3	1.14535	25.9
1850	RagaMuffin	24	22	21.2	25.2	0.916667	23.2
1851	RagaMuffin	18	16	14.9	13.2	0.888889	14.05
1852	RagaMuffin	22	23	22.8	18.4	1.04545	20.6
1853	RagaMuffin	25	24	25.4	26.5	0.96	25.95
1854	RagaMuffin	25	22	23.9	19.2	0.88	21.55
1855	RagaMuffin	28	31	19.7	24.7	1.10714	22.2
1856	RagaMuffin	27	28	26.5	23.4	1.03704	24.95
1857	RagaMuffin	24	35	24.6	27.5	1.45833	26.05
1858	RagaMuffin	24	21	30.4	22.2	0.875	26.3
1859	RagaMuffin	25	22	12.5	16.6	0.88	14.55
1860	RagaMuffin	22	22	17.6	14.7	1	16.15
1861	RagaMuffin	21	16	20.5	19.4	0.761905	19.95
1862	RagaMuffin	22	21	17.3	20.5	0.954545	18.9
1863	RagaMuffin	27	30	17.6	22.2	1.11111	19.9
1864	RagaMuffin	19	16	23.1	21.8	0.842105	22.45
1865	RagaMuffin	17	17	25	28.3	1	26.65
1866	RagaMuffin	24	20	18.4	23.6	0.833333	21
1867	RagaMuffin	38	38	20.1	20.7	1	20.4
1868	RagaMuffin	23	23	20.5	26.5	1	23.5
1869	RagaMuffin	31	31	22.2	23.7	1	22.95
1870	RagaMuffin	72	101	23.1	25.2	1.40278	24.15
1871	RagaMuffin	38	43	26.5	5.7	1.13158	16.1
1872	RagaMuffin	59	72	23.3	22.6	1.22034	22.95
1873	RagaMuffin	21	19	23.6	22.3	0.904762	22.95
1874	RagaMuffin	23	24	23.9	21.2	1.04348	22.55
1875	RagaMuffin	24	25	23.9	25.2	1.04167	24.55
1876	RagaMuffin	30	36	30.2	32	1.2	31.1
1877	RagaMuffin	54	54	24.3	22	1	23.15
1878	Ragdoll	181	237	30.1	32.1	1.30939	31.1
1879	Ragdoll	141	163	26.3	26.1	1.15603	26.2
1880	Ragdoll	176	173	26.1	22.6	0.982955	24.35
1881	Ragdoll	145	145	22.8	22.7	1	22.75
1882	Ragdoll	163	173	25.5	24.2	1.06135	24.85
1883	Ragdoll	148	125	23.5	21.9	0.844595	22.7
1884	Ragdoll	80	80	24.7	30.3	1	27.5
1885	Ragdoll	182	199	24.7	24.3	1.09341	24.5
1886	Ragdoll	182	207	27.4	31.3	1.13736	29.35
1887	Ragdoll	77	84	21.6	26.5	1.09091	24.05
1888	Ragdoll	70	107	26.5	24.5	1.52857	25.5
1889	Ragdoll	123	176	29.7	31.9	1.43089	30.8
1890	Ragdoll	21	22	19.4	25.2	1.04762	22.3
1891	Ragdoll	21	22	23.9	21.8	1.04762	22.85
1892	Ragdoll	17	17	23.1	23.1	1	23.1
1893	Ragdoll	18	14	17.1	15.9	0.777778	16.5
1894	Ragdoll	27	24	17.6	21.3	0.888889	19.45
1895	Ragdoll	25	24	21.2	22.8	0.96	22
1896	Ragdoll	19	18	28	29.7	0.947368	28.85
1897	Ragdoll	22	20	22.3	18.4	0.909091	20.35
1898	Ragdoll	29	27	23.4	22.9	0.931034	23.15
1899	Ragdoll	19	19	21.8	25	1	23.4
1900	Ragdoll	28	30	20.5	24.6	1.07143	22.55
1901	Ragdoll	18	18	26.5	25	1	25.75
1902	Ragdoll	21	28	29	27.6	1.33333	28.3
1903	Ragdoll	25	22	21.8	22.2	0.88	22
1904	Ragdoll	22	23	24.2	27.6	1.04545	25.9
1905	Ragdoll	22	21	19.4	22.3	0.954545	20.85
1906	Ragdoll	21	21	22.3	26.5	1	24.4
1907	Ragdoll	23	23	16.6	17.5	1	17.05
1908	Ragdoll	25	25	23.9	25.3	1	24.6
1909	Ragdoll	25	26	22.8	25.3	1.04	24.05
1910	Ragdoll	38	36	25.7	22.9	0.947368	24.3
1911	Ragdoll	22	21	20.5	23.6	0.954545	22.05
1912	Ragdoll	33	37	22.6	24.4	1.12121	23.5
1913	Ragdoll	26	34	24.4	28.8	1.30769	26.6
1914	Ragdoll	32	44	24.9	29.2	1.375	27.05
1915	Ragdoll	38	37	20.1	24.1	0.973684	22.1
1916	Ragdoll	21	23	19.4	22.8	1.09524	21.1
1917	Ragdoll	19	21	18.4	19.6	1.10526	19
1918	Ragdoll	20	23	16.3	19.4	1.15	17.85
1919	Ragdoll	35	37	21	23.4	1.05714	22.2
1920	Ragdoll	34	32	20.1	17.1	0.941176	18.6
1921	Ragdoll	37	36	24.9	23.6	0.972973	24.25
1922	Ragdoll	32	36	19.7	19.7	1.125	19.7
1923	Ragdoll	23	23	23.9	26.5	1	25.2
1924	Ragdoll	20	22	25.2	22.8	1.1	24
1925	Ragdoll	33	41	25.7	23.6	1.24242	24.65
1926	Ragdoll	34	35	24.9	22.7	1.02941	23.8
1927	Ragdoll	34	31	16.2	17.1	0.911765	16.65
1928	Russian Blue	138	155	25.2	25.6	1.12319	25.4
1929	Russian Blue	146	165	26.9	28.2	1.13014	27.55
1930	Russian Blue	162	180	32.2	26.3	1.11111	29.25
1931	Russian Blue	178	200	24	27.1	1.1236	25.55
1932	Russian Blue	182	189	25.7	26.1	1.03846	25.9
1933	Russian Blue	189	215	23.1	24.9	1.13757	24
1934	Russian Blue	153	210	27.6	28.7	1.37255	28.15
1935	Russian Blue	214	203	20.8	23.5	0.948598	22.15
1936	Russian Blue	155	201	29.9	30	1.29677	29.95
1937	Russian Blue	153	178	27.6	24.2	1.1634	25.9
1938	Russian Blue	48	39	24.3	20.5	0.8125	22.4
1939	Russian Blue	18	19	23.6	22.3	1.05556	22.95
1940	Russian Blue	25	25	23.9	20.8	1	22.35
1941	Russian Blue	22	26	25.2	23.9	1.18182	24.55
1942	Russian Blue	24	25	22.8	22.8	1.04167	22.8
1943	Russian Blue	20	21	22.3	19.4	1.05	20.85
1944	Russian Blue	19	17	21.8	21.8	0.894737	21.8
1945	Russian Blue	25	29	24.2	22.8	1.16	23.5
1946	Russian Blue	28	30	19.2	21.8	1.07143	20.5
1947	Russian Blue	20	21	18.4	23.6	1.05	21
1948	Russian Blue	21	23	23.6	21.2	1.09524	22.4
1949	Russian Blue	22	28	22.3	23.9	1.27273	23.1
1950	Russian Blue	24	33	25.3	22.2	1.375	23.75
1951	Russian Blue	17	18	26.5	21	1.05882	23.75
1952	Russian Blue	23	26	21.8	22.8	1.13043	22.3
1953	Russian Blue	22	23	20.5	19.4	1.04545	19.95
1954	Russian Blue	23	25	23.9	23.6	1.08696	23.75
1955	Russian Blue	20	22	26.5	28	1.1	27.25
1956	Russian Blue	32	33	24.6	28.8	1.03125	26.7
1957	Russian Blue	24	23	29.3	26.5	0.958333	27.9
1958	Russian Blue	16	20	28.3	23.1	1.25	25.7
1959	Russian Blue	34	37	21	21.4	1.08824	21.2
1960	Russian Blue	40	44	22.1	20.7	1.1	21.4
1961	Russian Blue	37	43	25.7	22.1	1.16216	23.9
1962	Russian Blue	21	20	20.2	22.3	0.952381	21.25
1963	Russian Blue	17	19	21.8	20.5	1.11765	21.15
1964	Russian Blue	23	25	25.3	25.2	1.08696	25.25
1965	Russian Blue	55	75	33.3	27	1.36364	30.15
1966	Russian Blue	31	33	21.3	22.6	1.06452	21.95
1967	Russian Blue	41	44	17.4	19.8	1.07317	18.6
1968	Russian Blue	22	28	20.2	27.8	1.27273	24
1969	Russian Blue	34	46	22.4	23.1	1.35294	22.75
1970	Russian Blue	19	23	22.3	22.3	1.21053	22.3
1971	Russian Blue	37	41	20.1	23.9	1.10811	22
1972	Russian Blue	33	36	23.4	24.6	1.09091	24
1973	Russian Blue	21	21	22.3	22.3	1	22.3
1974	Russian Blue	19	20	16.3	22.3	1.05263	19.3
1975	Russian Blue	25	36	28.8	25.4	1.44	27.1
1976	Russian Blue	118	156	32.6	33	1.32203	32.8
1977	Russian Blue	102	135	24.2	26.8	1.32353	25.5
1978	Savannah	41	61	23.9	27.5	1.4878	25.7
1979	Savannah	15	20	26.5	22.6	1.33333	24.55
1980	Savannah	92	125	28.6	31	1.3587	29.8
1981	Savannah	36	45	29	27.2	1.25	28.1
1982	Savannah	23	34	27.6	29.7	1.47826	28.65
1983	Savannah	21	31	25.3	27.7	1.47619	26.5
1984	Savannah	65	100	31.9	32	1.53846	31.95
1985	Savannah	75	101	24.4	26.9	1.34667	25.65
1986	Savannah	40	57	23.3	28.1	1.425	25.7
1987	Savannah	17	26	25	26.5	1.52941	25.75
1988	Savannah	44	52	24.3	24.4	1.18182	24.35
1989	Savannah	19	25	24.7	23.9	1.31579	24.3
1990	Savannah	21	30	26.5	31.4	1.42857	28.95
1991	Savannah	96	140	30.2	27.3	1.45833	28.75
1992	Savannah	102	143	23.7	26.8	1.40196	25.25
1993	Savannah	97	115	15.7	22.2	1.18557	18.95
1994	Savannah	26	36	30	27.8	1.38462	28.9
1995	Savannah	23	25	22.6	23.6	1.08696	23.1
1996	Savannah	26	35	32.2	27.7	1.34615	29.95
1997	Savannah	41	59	22.4	27.2	1.43902	24.8
1998	Savannah	99	131	28.2	28	1.32323	28.1
1999	Savannah	21	27	29	28.8	1.28571	28.9
2000	ScottishFold	93	103	26.8	30.7	1.10753	28.75
2001	ScottishFold	168	187	25.2	28.3	1.1131	26.75
2002	ScottishFold	134	149	27.4	25.7	1.11194	26.55
2003	ScottishFold	167	173	25.2	29.1	1.03593	27.15
2004	ScottishFold	233	261	24.7	25.4	1.12017	25.05
2005	ScottishFold	127	128	20.5	24.9	1.00787	22.7
2006	ScottishFold	175	146	22.9	28.5	0.834286	25.7
2007	ScottishFold	134	117	23.1	22.2	0.873134	22.65
2008	ScottishFold	116	137	22.6	20.9	1.18103	21.75
2009	ScottishFold	150	101	19.5	20	0.673333	19.75
2010	ScottishFold	167	163	26.5	24.7	0.976048	25.6
2011	ScottishFold	155	119	23.9	24	0.767742	23.95
2012	ScottishFold	153	120	27.1	25.7	0.784314	26.4
2013	ScottishFold	135	124	23	20.2	0.918519	21.6
2014	ScottishFold	187	204	24.1	28.9	1.09091	26.5
2015	ScottishFold	194	171	25.8	26.5	0.881443	26.15
2016	ScottishFold	78	60	19.7	17.9	0.769231	18.8
2017	ScottishFold	117	114	20.9	24.6	0.974359	22.75
2018	ScottishFold	134	129	23.1	21.1	0.962687	22.1
2019	ScottishFold	142	145	26.5	23.8	1.02113	25.15
2020	ScottishFold	129	132	21.2	22.1	1.02326	21.65
2021	ScottishFold	129	143	28.8	25.6	1.10853	27.2
2022	ScottishFold	140	135	21.1	20.4	0.964286	20.75
2023	ScottishFold	182	190	24.5	26.5	1.04396	25.5
2024	ScottishFold	154	145	22.4	22	0.941558	22.2
2025	ScottishFold	22	21	21.8	18.4	0.954545	20.1
2026	ScottishFold	29	25	17.5	18.4	0.862069	17.95
2027	ScottishFold	18	14	21.8	23.6	0.777778	22.7
2028	ScottishFold	19	16	19.4	26.5	0.842105	22.95
2029	ScottishFold	30	26	23.4	24.6	0.866667	24
2030	ScottishFold	22	17	20.2	20.2	0.772727	20.2
2031	ScottishFold	29	28	21.8	24.2	0.965517	23
2032	ScottishFold	26	24	21.3	19.1	0.923077	20.2
2033	ScottishFold	20	17	16.3	18.4	0.85	17.35
2034	ScottishFold	22	18	16.3	20.5	0.818182	18.4
2035	ScottishFold	21	18	25.2	23.9	0.857143	24.55
2036	ScottishFold	22	19	17.5	13.2	0.863636	15.35
2037	ScottishFold	27	23	25.2	24.2	0.851852	24.7
2038	ScottishFold	20	16	14	18.4	0.8	16.2
2039	ScottishFold	26	18	20.5	18.4	0.692308	19.45
2040	ScottishFold	24	22	25.3	22.8	0.916667	24.05
2041	ScottishFold	24	18	22.3	22.8	0.75	22.55
2042	ScottishFold	25	23	24.2	20.8	0.92	22.5
2043	ScottishFold	19	14	22.3	19.4	0.736842	20.85
2044	ScottishFold	26	23	21.8	24.6	0.884615	23.2
2045	ScottishFold	23	17	13.3	14.7	0.73913	14
2046	ScottishFold	22	17	22.3	19.2	0.772727	20.75
2047	ScottishFold	17	13	26.5	23.1	0.764706	24.8
2048	ScottishFold	26	24	23.9	23.1	0.923077	23.5
2049	ScottishFold	18	17	23.9	21.8	0.944444	22.85
2050	Selkirk Rex	194	161	26.7	26.2	0.829897	26.45
2051	Selkirk Rex	136	159	24.7	27.6	1.16912	26.15
2052	Selkirk Rex	179	195	26.7	25.7	1.08939	26.2
2053	Selkirk Rex	23	18	21.8	22.3	0.782609	22.05
2054	Selkirk Rex	35	33	23.7	23.7	0.942857	23.7
2055	Selkirk Rex	24	14	15.9	14.9	0.583333	15.4
2056	Selkirk Rex	20	17	23.1	18.4	0.85	20.75
2057	Selkirk Rex	37	32	20.1	23.1	0.864865	21.6
2058	Selkirk Rex	29	20	20.2	18.4	0.689655	19.3
2059	Selkirk Rex	24	17	15.9	17.5	0.708333	16.7
2060	Selkirk Rex	20	13	22.6	21.8	0.65	22.2
2061	Selkirk Rex	18	17	23.1	24.7	0.944444	23.9
2062	Selkirk Rex	22	15	19.6	17.3	0.681818	18.45
2063	Selkirk Rex	22	17	15.9	17.1	0.772727	16.5
2064	Selkirk Rex	24	23	20.5	17.3	0.958333	18.9
2065	Selkirk Rex	18	16	20.5	25.2	0.888889	22.85
2066	Selkirk Rex	48	48	27.2	25.2	1	26.2
2067	Selkirk Rex	40	29	12.9	15	0.725	13.95
2068	Selkirk Rex	39	33	21.8	22.9	0.846154	22.35
2069	Selkirk Rex	26	22	21.2	21.2	0.846154	21.2
2070	Selkirk Rex	22	17	20.5	19.4	0.772727	19.95
2071	Selkirk Rex	27	23	21.2	20.2	0.851852	20.7
2072	Selkirk Rex	73	59	17.2	24.3	0.808219	20.75
2073	Selkirk Rex	24	17	22.3	21.2	0.708333	21.75
2074	Selkirk Rex	27	21	17.5	19.4	0.777778	18.45
2075	Selkirk Rex	19	14	15.9	15.9	0.736842	15.9
2076	Selkirk Rex	24	20	24.9	26.3	0.833333	25.6
2077	Selkirk Rex	25	25	16.6	19.2	1	17.9
2078	Selkirk Rex	53	55	21.3	22.8	1.03774	22.05
2079	Selkirk Rex	31	27	20.2	22.8	0.870968	21.5
2080	Selkirk Rex	32	27	17.5	17.6	0.84375	17.55
2081	Selkirk Rex	24	23	19.9	23.1	0.958333	21.5
2082	Selkirk Rex	29	20	19.2	16.6	0.689655	17.9
2083	Selkirk Rex	22	14	17.3	19.4	0.636364	18.35
2084	Selkirk Rex	23	23	15.5	20.5	1	18
2085	Selkirk Rex	23	18	20.5	21.8	0.782609	21.15
2086	Selkirk Rex	34	34	26.5	27.5	1	27
2087	Selkirk Rex	23	17	21.8	18.4	0.73913	20.1
2088	Selkirk Rex	26	20	14.9	16.3	0.769231	15.6
2089	Selkirk Rex	42	39	20.7	22.7	0.928571	21.7
2090	Selkirk Rex	22	16	21.8	19.4	0.727273	20.6
2091	Selkirk Rex	89	86	20.3	20.7	0.966292	20.5
2092	Selkirk Rex	34	30	28.6	27.3	0.882353	27.95
2093	Selkirk Rex	18	18	26.5	21.8	1	24.15
2094	Selkirk Rex	30	24	18.4	14.7	0.8	16.55
2095	Selkirk Rex	74	82	18.7	22.9	1.10811	20.8
2096	Selkirk Rex	18	15	26.5	21	0.833333	23.75
2097	Selkirk Rex	34	33	24.1	23.9	0.970588	24
2098	Selkirk Rex	35	22	20.5	17.8	0.628571	19.15
2099	Selkirk Rex	35	38	17.8	20.7	1.08571	19.25
2100	Siamese	53	81	33.6	28.1	1.5283	30.85
2101	Siamese	99	159	24.7	28.5	1.60606	26.6
2102	Siamese	23	30	23.9	21.2	1.30435	22.55
2103	Siamese	17	28	24.7	18.4	1.64706	21.55
2104	Siamese	17	22	17.1	22.6	1.29412	19.85
2105	Siamese	20	27	14.9	16.3	1.35	15.6
2106	Siamese	19	24	23.1	17.3	1.26316	20.2
2107	Siamese	43	66	17.2	17.2	1.53488	17.2
2108	Siamese	17	27	28.3	28.3	1.58824	28.3
2109	Siamese	40	64	27.9	25.8	1.6	26.85
2110	Siamese	30	47	20.5	25.5	1.56667	23
2111	Siamese	16	26	26.5	25	1.625	25.75
2112	Siamese	36	56	23.6	26.5	1.55556	25.05
2113	Siamese	21	29	17.3	18.4	1.38095	17.85
2114	Siamese	17	22	17.1	18.4	1.29412	17.75
2115	Siamese	36	55	24.1	22.1	1.52778	23.1
2116	Siamese	34	71	25.8	22.1	2.08824	23.95
2117	Siamese	42	60	18.4	20.7	1.42857	19.55
2118	Siamese	20	27	14	18.4	1.35	16.2
2119	Siamese	36	44	22.6	23.1	1.22222	22.85
2120	Siamese	17	21	19.9	22.6	1.23529	21.25
2121	Siamese	17	27	22.6	22.6	1.58824	22.6
2122	Siamese	39	65	26.5	26.5	1.66667	26.5
2123	Siamese	17	26	21	18.4	1.52941	19.7
2124	Siamese	58	81	22.3	27	1.39655	24.65
2125	Siamese	44	69	21.5	22.9	1.56818	22.2
2126	Siamese	18	27	19.6	19.6	1.5	19.6
2127	Siamese	31	50	20.5	17.7	1.6129	19.1
2128	Siamese	55	87	27.6	30.9	1.58182	29.25
2129	Siamese	27	40	25.4	24.2	1.48148	24.8
2130	Siamese	207	347	26.1	26	1.67633	26.05
2131	Siamese	153	241	21.9	21.8	1.57516	21.85
2132	Siamese	39	62	25	23.4	1.58974	24.2
2133	Siamese	223	373	27.3	25.3	1.67265	26.3
2134	Siamese	38	47	23.1	19.9	1.23684	21.5
2135	Siamese	28	48	27.4	27.4	1.71429	27.4
2136	Siamese	147	257	24.8	26.3	1.7483	25.55
2137	Siamese	17	28	29.7	30.2	1.64706	29.95
2138	Siamese	31	52	21	19	1.67742	20
2139	Siamese	24	41	26.5	21.3	1.70833	23.9
2140	Siamese	23	35	15.5	18.4	1.52174	16.95
2141	Siamese	23	33	25.2	25	1.43478	25.1
2142	Siamese	41	65	22	22.7	1.58537	22.35
2143	Siamese	30	58	24.9	27.3	1.93333	26.1
2144	Siamese	78	114	26	21.1	1.46154	23.55
2145	Siamese	110	171	21.9	26.5	1.55455	24.2
2146	Siamese	32	47	21	19	1.46875	20
2147	Siamese	59	91	27	28.1	1.54237	27.55
2148	Siamese	72	103	24.7	26	1.43056	25.35
2149	Siamese	18	29	17.3	19.6	1.61111	18.45
[truncated: 435 more rows]

## Sheet: Study1_selected data
ID	Groups	B/A	(C+D)/2
0001	African wildcat	1.3169	24.9
0002	African wildcat	1.31298	28.05
0003	African wildcat	1.50549	23.65
0004	African wildcat	1.46	25.45
0005	African wildcat	1.22449	29.15
0006	African wildcat	1.46667	30.25
0007	African wildcat	1.46875	25.8
0008	African wildcat	1.31313	23.35
0009	African wildcat	1.40541	23.05
0010	African wildcat	1.3	22.7
0011	African wildcat	1.49398	20.75
0012	African wildcat	1.33333	22.95
0013	African wildcat	1.33333	20.545
0014	African wildcat	1.38889	25.75
0015	African wildcat	1.23684	26.15
0016	African wildcat	1.04762	25.75
0017	African wildcat	1.35484	23.8
0018	African wildcat	1.20779	24.4
0019	African wildcat	1.31707	20.65
0020	African wildcat	1.12821	23.95
0021	African wildcat	1.34483	28.9
0022	African wildcat	1.24138	30.35
0023	African wildcat	1.31579	24.25
0024	African wildcat	1.14815	26.2
0025	African wildcat	1.3125	29.6
0026	African wildcat	1.29333	28.85
0027	African wildcat	1.34483	30.75
0028	African wildcat	1.33333	25.9
0029	African wildcat	1.34375	25.6
0030	African wildcat	1.31579	27.45
0031	African wildcat	1.32143	28.75
0032	African wildcat	1.5567	28.85
0033	African wildcat	1.25	21.95
0034	African wildcat	1.31298	20.65
0035	African wildcat	1.17241	21.55
0036	African wildcat	1.48718	28
0037	African wildcat	1.375	20.65
0038	African wildcat	1.41497	26.85
0039	African wildcat	1.63248	22.65
0040	African wildcat	1.48101	27.25
0041	African wildcat	1.17544	26.15
0042	African wildcat	1.30579	25.3
0043	African wildcat	1.4	30.4
0044	African wildcat	1.43617	21.4
0045	African wildcat	1.4382	31.1
0046	African wildcat	1.39241	26.15
0047	African wildcat	1.32	29.95
0048	African wildcat	1.5	23.65
0049	African wildcat	1.2521	24.4
0050	African wildcat	1.34783	25.8
0090	feral mixed breed	1.18447	28.25
0085	feral mixed breed	1.03356	24.2
0076	feral mixed breed	1.26154	28.55
0093	feral mixed breed	1.3125	25.45
0075	feral mixed breed	1.2381	27.95
0092	feral mixed breed	1.19608	21.25
0073	feral mixed breed	1.17355	19.65
0083	feral mixed breed	1.4958	27.7
0063	feral mixed breed	1.21875	20.55
0065	feral mixed breed	1.07778	18.5
0068	feral mixed breed	1.42857	25.3
0064	feral mixed breed	0.992647	20.05
0084	feral mixed breed	1.25203	26.15
0086	feral mixed breed	1.36066	25.5
0059	feral mixed breed	1.27211	23.15
0094	feral mixed breed	1.11194	34.5
0062	feral mixed breed	1.39706	26.35
0077	feral mixed breed	1.47742	21.95
0052	feral mixed breed	1.20259	23.55
0070	feral mixed breed	1.36054	25.8
3227	feral mixed breed	1.57143	31.15
3247	feral mixed breed	1.85567	26.6
3263	feral mixed breed	1.2963	30.4
3230	feral mixed breed	1.30345	22.5
3234	feral mixed breed	1.5561	26.25
3233	feral mixed breed	1.45714	31.2
3238	feral mixed breed	1.28205	23
3259	feral mixed breed	1.58333	26.15
3251	feral mixed breed	1.4	30.6
3243	feral mixed breed	1.30348	25.55
3240	feral mixed breed	1.42105	22.9
3267	feral mixed breed	1.37838	26
3228	feral mixed breed	1.44371	27.75
3266	feral mixed breed	1.2	25.65
3255	feral mixed breed	1.25664	25.75
3245	feral mixed breed	1.41237	26.8
3260	feral mixed breed	1.22941	27.85
3254	feral mixed breed	1.41538	28.3
3237	feral mixed breed	1.34483	28.5
3235	feral mixed breed	1.23404	24.9
3288	feral mixed breed	1.31034	23
3297	feral mixed breed	1.26316	17.75
3207	feral mixed breed	1.41379	26.2
3219	feral mixed breed	1.09091	20.95
3277	feral mixed breed	1.05556	22.1
3200	feral mixed breed	1.36364	26.5
3283	feral mixed breed	1.125	20.45
3278	feral mixed breed	1.05357	21.95
3275	feral mixed breed	1.54237	26.75
3291	feral mixed breed	1.4	21.9
3298	feral mixed breed	1.69231	19.05
3208	feral mixed breed	1.375	28.4
3204	feral mixed breed	1.28571	21.7
3280	feral mixed breed	1.33333	26.95
3284	feral mixed breed	1.37778	31.05
3221	feral mixed breed	1.02083	26.15
3203	feral mixed breed	1.33333	20.1
3289	feral mixed breed	1.26316	27.2
3296	feral mixed breed	1.32	21
3292	feral mixed breed	1.45455	24.4
0339	owned domestic mixed breed	1.27152	29.3
0617	owned domestic mixed breed	1.21875	28.35
0496	owned domestic mixed breed	1.2381	25.4
0615	owned domestic mixed breed	1.27273	25.35
0701	owned domestic mixed breed	1.42857	27.45
0586	owned domestic mixed breed	1.38537	25.3
0655	owned domestic mixed breed	1.4697	22.05
0504	owned domestic mixed breed	1.12879	24.4
0720	owned domestic mixed breed	1.03883	26.35
0253	owned domestic mixed breed	1.30102	31.4
0247	owned domestic mixed breed	1.36522	26
0315	owned domestic mixed breed	1.13986	28.85
0516	owned domestic mixed breed	1.19811	32.85
0623	owned domestic mixed breed	1.176	19.85
0162	owned domestic mixed breed	1.60504	20.1
0190	owned domestic mixed breed	1.29213	30.4
0721	owned domestic mixed breed	1.41509	26.2
0751	owned domestic mixed breed	1.09023	22.85
0748	owned domestic mixed breed	1.2695	22.85
0405	owned domestic mixed breed	1.21341	27.35
0546	owned domestic mixed breed	0.953488	21.45
0386	owned domestic mixed breed	1.05263	26.8
0147	owned domestic mixed breed	1.12042	23.1
0113	owned domestic mixed breed	1.25714	25.2
0569	owned domestic mixed breed	1.22807	22.1
0503	owned domestic mixed breed	0.925532	29.2
0349	owned domestic mixed breed	1.18182	26.3
0478	owned domestic mixed breed	1.22	24.55
0707	owned domestic mixed breed	1.16774	26.1
0762	owned domestic mixed breed	1.12102	21.35
0696	owned domestic mixed breed	1.20548	31.5
0151	owned domestic mixed breed	1.06842	16.5
0514	owned domestic mixed breed	1.38298	24.9
0412	owned domestic mixed breed	0.974026	30.2
0341	owned domestic mixed breed	1.11111	27.4
0270	owned domestic mixed breed	1.11905	27.85
0152	owned domestic mixed breed	1.02857	19.15
0234	owned domestic mixed breed	1.26667	30.05
0732	owned domestic mixed breed	1.15135	27
0677	owned domestic mixed breed	1.1326	19.9
0145	owned domestic mixed breed	1.3866	17.05
0424	owned domestic mixed breed	1.24044	27.95
0233	owned domestic mixed breed	1.19663	27.15
0531	owned domestic mixed breed	1.28485	25.6
0534	owned domestic mixed breed	1.35976	26.3
0118	owned domestic mixed breed	1.16418	23.35
0311	owned domestic mixed breed	1.27778	27.45
0676	owned domestic mixed breed	1.32184	26.65
0150	owned domestic mixed breed	1.20238	20.7
0765	owned domestic mixed breed	1.00541	27.1
0476	owned domestic mixed breed	1.35345	28.4
0488	owned domestic mixed breed	1.40397	20.4
0624	owned domestic mixed breed	1.64901	25.75
0371	owned domestic mixed breed	1.16667	17.3
0362	owned domestic mixed breed	1.18519	23.25
0450	owned domestic mixed breed	1.365	29.1
0360	owned domestic mixed breed	1.34091	24.35
0188	owned domestic mixed breed	1.19255	27.05
0729	owned domestic mixed breed	1.21239	26.25
0731	owned domestic mixed breed	1.20896	24.4
04	owned domestic purebreds	0.993317	24.037
05	owned domestic purebreds	1.21369	24.876
06	owned domestic purebreds	1.21713	23.6371
07	owned domestic purebreds	0.962057	24.644
08	owned domestic purebreds	0.880046	22.453
09	owned domestic purebreds	1.20827	23.35
10	owned domestic purebreds	1.58339	24.498
11	owned domestic purebreds	1.23558	25.189
12	owned domestic purebreds	1.12988	19.4
13	owned domestic purebreds	1.01171	21.674
14	owned domestic purebreds	0.917945	24.996
15	owned domestic purebreds	0.961656	21.399
16	owned domestic purebreds	1.10039	24.887
17	owned domestic purebreds	1.14996	25.202
18	owned domestic purebreds	1.20983	25.405
19	owned domestic purebreds	1.46273	23.0988
20	owned domestic purebreds	1.24593	20.035
21	owned domestic purebreds	1.12945	22.5659
22	owned domestic purebreds	0.889738	19.005
23	owned domestic purebreds	1.13721	23.6652
24	owned domestic purebreds	1.26696	22.51
25	owned domestic purebreds	1.3043	24.965
26	owned domestic purebreds	0.391618	15.145
27	owned domestic purebreds	1.29005	18.208
28	owned domestic purebreds	0.83094	17.9117
29	owned domestic purebreds	1.19951	20.952
30	owned domestic purebreds	1.23464	23.982
31	owned domestic purebreds	1.19652	21.949
32	owned domestic purebreds	1.26027	22.6163
33	owned domestic purebreds	1.21409	21.5484
34	owned domestic purebreds	1.14529	23.9659
35	owned domestic purebreds	1.12317	22.538
36	owned domestic purebreds	1.07818	22.626
37	owned domestic purebreds	0.974339	20.8387
38	owned domestic purebreds	1.05427	22.9794
39	owned domestic purebreds	1.26151	23.5038
40	owned domestic purebreds	1.20689	25.143
41	owned domestic purebreds	1.1939	23.176
42	owned domestic purebreds	1.4792	22.0902
43	owned domestic purebreds	0.498348	14.2676
44	owned domestic purebreds	1.36212	22.4656
45	owned domestic purebreds	1.22718	23.0759
46	owned domestic purebreds	1.02212	22.2293
47	owned domestic purebreds	1.05759	23.473
48	owned domestic purebreds	1.12699	23.999
49	owned domestic purebreds	1.36643	26.6659
50	owned domestic purebreds	0.906722	22.585
51	owned domestic purebreds	0.851425	20.898
52	owned domestic purebreds	1.53412	23.011
53	owned domestic purebreds	1.09568	23.134
54	owned domestic purebreds	1.06029	22.829
55	owned domestic purebreds	1.24267	23.6568
56	owned domestic purebreds	1.30826	26.605
57	owned domestic purebreds	1.14065	24.075
58	owned domestic purebreds	1.04536	22.396
59	owned domestic purebreds	1.30015	23.505
60	owned domestic purebreds	1.12534	23.112
61	owned domestic purebreds	1.27659	25.6261
62	owned domestic purebreds	1.2854	23.737
63	owned domestic purebreds	1.24469	24.352

## Sheet: Study2
ID	Sex	Years with the owner	B/A	(C+D)/2	Sociability with people	Stranger-directed aggression
1	Female	1	1.2605	24.65	1	2.5
2	Female	1	1.11852	26.05	3	1
3	Female	1.8333	1.04082	24.05	2.25	0
4	Female	2.0833	1.06077	20.75	2	1
5	Male	1.9167	1.25735	23.25	2.25	0
6	Female	3.9167	1.26702	26.75	1.8	0
7	Male	4	1.3	26.6	1.25	0.5
8	Female	4	1.33803	29.25	0.142857	1
9	Female	4.25	1.17241	27.35	0	0.666667
10	Male	6	1.08633	28.2	1.57143	2.33333
11	Female	6	1.08658	23.55	0	1.33333
12	Male	6.0833	1.34737	27.15	0	NA
13	Female	4	1.25694	24.8	0.4	1
14	Female	8	1.29167	23.1	1.85714	0
15	Female	8	1.26708	30.65	1.85714	0
16	Male	8	1.15232	20.25	0.428571	1
17	Female	21	1.27027	21.5	0.285714	2.33333
18	Male	1	1.32143	28.4	3	0.5
19	Male	0.75	1.29389	28.2	0.833333	0
20	Male	1	1.29825	27.1	0	3
21	Male	1	1.30365	25.6	0.428571	3
22	Male	1.5	1.25714	25.2	4	0
23	Female	1.5	1.33696	27.7	0.428571	0
24	Female	1.4167	1.48507	27.05	1	0
25	Female	1.5833	1.03866	22.55	0	1
26	Female	1.8333	1.34711	27.6	0	0
27	Female	2	1.13736	23	3.75	0
28	Female	2	1.25478	27.65	2.25	1
29	Female	2.5	1.06716	23.05	1.28571	2
30	Male	2.6667	1.47872	24.4	1.14286	0
31	Female	2.5	1.2719	23.55	1.25	0
32	Female	2.5	1.16418	23.35	1	0
33	Female	3.75	1.3	22.9	3.16667	0.333333
34	Female	3.75	1.4023	25.85	3.75	0
35	Female	3	1.27322	24.95	0.75	0.5
36	Male	3.75	1.29032	27.2	0	0
37	Female	0.5	1.28846	27.3	0	3
38	Male	4.75	1.25767	24.35	2.33333	0.333333
39	Female	4.5	1.09091	23.95	0	0
40	Male	4.75	1.61677	20.35	1.71429	0
41	Male	4.5	1.26027	26.4	1.66667	0.333333
42	Male	5.4167	1.20084	25.05	0	1
43	Male	5.4167	1.42322	30.45	2.4	0
44	Female	5.5	1.125	24.25	1.83333	2
45	Female	5.5	1.20501	20.95	0.333333	3
46	Male	6.1667	1.48116	24.55	3.28571	0.333333
47	Female	4	1.10559	27	3	1
48	Female	6.9167	1.45725	25.25	2	1
49	Female	6.75	1.24706	28.2	1.75	0
50	Female	7.5	1.44368	24.85	3.5	0
51	Male	7.5	1.34878	24.2	2.25	0
52	Male	4	1.16185	22.1	1.85714	1.33333
53	Male	0.5	1.37195	24.9	1.4	0
54	Male	0.8333	1.19643	21.75	2.5	0
55	Male	0.5833	1.17834	25.05	1	0
56	Female	0.8333	1.59504	26.35	0	0
57	Male	0.3333	1.125	24.905	3.25	0
58	Male	1	1.2381	25.4	0.857143	0
59	Female	0.4167	1.1358	29.15	2.14286	0
60	Female	1	1.63077	31.55	0	0
61	Male	0.25	1.37725	25.25	2.75	0
62	Female	1.1667	1.42958	28.6	0.571429	0
63	Female	1.0833	1.23718	25.55	0.666667	3.5
64	Male	1.0833	1.2125	30.3	NA	NA
65	Female	1.25	1.10383	24.6	0	0
66	Male	1.1667	1.21875	28.35	0.142857	0
67	Female	1.1667	1.27273	24.55	0.571429	0
68	Male	0.8333	1.17073	22.45	3.14286	0
69	Female	1.1667	1.06842	16.5	0.857143	0
70	Female	1.3333	1.54268	25.05	1	0
71	Male	1.0833	1.21277	30.05	1	0
72	Female	1.1667	1.36364	28.7	0.571429	0.666667
73	Male	1.0833	1.21875	26.75	0	0
74	Female	1.0833	1.32174	24.3	0	NA
75	Male	0.5	1.17857	29.5	0.75	2
76	Female	1.1667	1.27273	25.35	2.85714	1.33333
77	Female	1.25	1.28261	31.8	3.25	0
78	Male	1.25	1.22464	23.8	3.14286	0
79	Female	1.25	0.946565	20.7	2.5	0
80	Male	0.6667	1.34091	24.35	4	0
81	Male	0.9167	1.22047	26.4	0	4
82	Male	1.25	1.18447	20.5	3.25	0
83	Female	1.4167	1.14966	28.05	1	0.5
84	Female	1.3333	1.2963	31.05	0	0
85	Female	1.1667	1.36111	27.8	3	0
86	Female	1.3333	1.4965	29.4	2.75	0
87	Female	1.25	1.09548	20.55	0	3.33333
88	Male	1.25	1.19663	27.15	0	NA
89	Female	1.25	1.37059	28	0	0
90	Female	1.3333	1.37226	19.35	3	1.5
91	Female	0.6667	1.64901	25.75	0	0.666667
92	Female	1.0833	1.34161	26.3	3	0
93	Female	1.3333	1.29412	30.5	0.428571	2.33333
94	Male	1.5	1.39344	26.15	1	0
95	Female	1.1667	1.14851	26.05	0	0.5
96	Male	0.8333	1.2695	22.85	0	0
97	Male	2	1.45783	25.75	0.5	0
98	Male	9.9167	1.01399	27.6	3.14286	0
99	Female	10	1.272	21.95	0	3
100	Female	9.9167	1.40972	18.95	0.857143	1
101	Male	9.9167	1.26115	27.3	1.28571	0.666667
102	Female	10	1.09249	23.35	0.5	1.5
103	Female	9.9167	1.18817	22.75	1.85714	0.666667
104	Female	9.75	1.02759	24.1	0.5	0
105	Female	10.1667	1.1462	26.95	0	4
106	Male	10.1667	1.32212	26.1	2.14286	0
107	Male	10.1667	1.085	29.05	2.42857	NA
108	Male	10.25	0.839572	32.5	2.5	0
109	Male	9.5	1.23529	25.85	2.16667	0.666667
110	Female	10.25	1.1676	23.8	3	0
111	Male	9.3333	1.23009	25.45	4	0
112	Female	4.9167	1.60504	20.1	0.714286	0.333333
113	Male	11	0.979058	23.8	1	0
114	Male	11	1.45399	26.85	0	1
115	Male	10.9167	1.29861	18.6	0	1
116	Female	10.8333	1.16981	26.7	1.42857	0
117	Female	11	1.46914	22	0.142857	4
118	Male	11.1667	1.46701	16	0.428571	0.666667
119	Female	10.8333	1.00541	27.1	0.6	1.5
120	Male	11.3333	1.08725	24.6	0.142857	0.666667
121	Female	11	1.1626	25.9	0	0
122	Female	12	1.44	24.85	0.285714	2
123	Male	11.3333	1.21384	29.8	3.5	0
124	Female	12.75	1.26667	30.05	1.28571	1
125	Female	7.8333	1.3866	17.05	4	0
126	Female	13.9167	0.988506	29.05	NA	NA
127	Male	13.8333	1.30137	25.7	1	0
128	Female	14.25	1.2623	20.75	0.142857	4
129	Male	15.1667	1.31188	30.6	0	0.333333
130	Male	15.3333	1.18261	24	0.571429	1
131	Male	15.3333	1.03226	23.8	3.71429	0.333333
132	Male	14.5833	1.37576	23.7	0.142857	4
133	Female	15.9167	1.41481	23.45	2	0.666667
134	Male	16.0833	1.43511	26.3	4	0
135	Female	16.1667	1.07303	29.55	3	0.5
136	Female	16.25	1.07296	28.35	4	0
137	Male	16.3333	1.36548	28.1	0	0
138	Male	16.9167	1.53409	26.55	3.2	1
139	Female	18	1.14085	22.35	3.57143	0.333333
140	Female	18.4167	1.10294	22.25	1	2
141	Male	18.3333	1.1037	23.25	4	0
142	Female	19.75	1.4569	21.45	0.142857	2.33333
143	Female	1.5	1.27778	27.45	0.6	0.333333
144	Female	1.8333	1.3125	32.7	1	0
145	Male	1.8333	1.27329	28.85	3	0
146	Female	1.75	1.25989	27.95	0.142857	0
147	Male	1.8333	1.08966	22.95	0	0
148	Male	1.75	1.26531	26.5	0.428571	0
149	Male	1.75	1.25	19.85	1.85714	0
150	Female	1.75	1.24444	24.4	0	0
151	Female	2	1.32576	26.2	1.5	0
152	Female	1.8333	1.06818	27.2	1.28571	0
153	Male	2	1.39048	22.65	NA	2
154	Female	1.1667	1.2	24.1	0.571429	0
155	Male	1.8333	1.40659	28.45	0.571429	2
156	Female	2.0833	1.1327	27.5	0.25	0
157	Male	1.9167	1.15603	30.9	2	0
158	Female	2.1667	1.36036	27.5	1	0
159	Male	1.8333	1.27152	29.3	0	0
160	Male	1.9167	1.21341	27.35	1.5	0
161	Female	2	1.2	25.95	0.2	1.5
162	Female	1.75	1.05806	25.95	0	0
163	Male	1.8333	1.51656	29.5	0.25	0
164	Female	2.0833	1.1547	30.4	1	1
165	Female	2	1.05738	23.55	3	0
166	Female	1.75	1.36842	26.25	0	NA
167	Male	2.25	1.47183	30.3	0	1.66667
168	Male	2.25	1.40594	17.05	3	0
169	Female	2	1.06767	27.5	0	1.33333
170	Female	2.1667	1.53503	19.5	2.14286	0
171	Male	2.0833	1.22872	26.65	0	0
172	Male	2.0833	1.25517	30.4	1.25	0
173	Female	2.1667	1.08264	22.85	4	0
174	Male	1.5833	1.20112	26.65	2.71429	0
175	Female	2.0833	1.12973	25.95	0.428571	2
176	Male	2.25	1.20667	29.15	2.14286	0.333333
177	Male	2.25	1.3869	26.95	1.57143	0
178	Male	2.3333	1.16429	25.15	4	0
179	Female	2.25	1.3609	30.65	NA	NA
180	Male	2.25	1.10309	26.25	3	0
181	Female	2.3333	0.981221	22.75	0.666667	0
182	Female	2.3333	1.07212	22.95	0	NA
183	Female	2.4167	1.12698	25.05	1.83333	0
184	Male	2.25	1.41463	25.95	0.142857	0.5
185	Female	2.25	1.26786	23.1	0.75	2
186	Female	2.3333	1.10784	24.35	3.57143	0
187	Male	2.3333	1.12676	23.25	0.5	0
188	Female	2.1667	1.23841	29.45	3.5	0
189	Male	2.25	0.925532	29.2	2.5	0.5
190	Male	2.25	1.11111	27.4	0.833333	2
191	Male	2.3333	1.14634	29	0	0
192	Male	2.0833	1.14508	28.6	1	1
193	Male	2.4167	1.13793	24.65	4	0
194	Male	0.5833	1.48031	26.95	0.666667	1
195	Male	2.6667	0.916129	22.55	0	0
196	Female	2.6667	1.16296	22.35	0	0
197	Female	2.5	1.28099	31.9	0.25	0
198	Male	2.5	1.3625	29.5	0	0
199	Female	2.5	1.28261	26.5	0	2.33333
200	Female	2.9167	1.18452	30.35	1.57143	0
201	Male	2	1.17895	24.75	0.75	3
202	Male	20	1.39264	23	4	0
203	Male	21.25	1.03356	23.45	0.8	2
204	Female	22.1667	1.33333	22.1	3	0
205	Female	2.75	0.96748	24.45	0	2.66667
206	Male	2.5	1.10884	23.45	3.14286	0
207	Female	1.3333	1.41379	27.75	0.714286	0.5
208	Male	1.3333	1.42754	24.2	1.14286	1
209	Male	2.6667	1.17347	29	0	3
210	Female	3	1.11404	21.65	3.75	0
211	Female	2.9167	1.04	25.6	0	0
212	Female	3	1.22013	28.8	1.28571	1.33333
213	Male	2.1467	1.34074	26.05	3	0
214	Female	3	1.30645	26.15	0.571429	2
215	Female	3.1667	1.33333	19.35	0.75	3
216	Male	3	1.18182	26.3	0.428571	0.666667
217	Male	3.0833	1.00645	25.6	0.75	1
218	Male	3	1.2695	24.5	0.833333	0
219	Female	2.25	1.07362	23.6	0.5	0
220	Female	3.0833	1.21239	26.25	0.428571	3
221	Female	3.3333	1.25926	26.05	1.4	1
222	Female	3.25	1.10811	21.95	1.75	0.5
223	Male	2.9167	0.957831	22.5	0	0
224	Female	2.9167	1.05612	26.35	0	3
225	Male	3.0833	0.926471	28	1.33333	0
226	Male	3.1667	1.11176	26.9	0.285714	0
227	Female	3.25	1.28986	24.8	0.5	2
228	Male	2.4167	1.31771	27.25	4	0
229	Male	3.25	1.03165	27.1	0	0
230	Female	3.3333	1.18539	25.55	0	0
231	Male	3.4167	1.41615	25.1	0	NA
232	Male	2.8333	1.10191	26.25	0.571429	0
233	Male	3.1667	1.12179	25.35	0.714286	0
234	Female	2.1667	1.29752	31.7	0	2
235	Female	3.4167	1.28037	27.15	0.333333	0
236	Female	2.75	1.11579	28.8	1.33333	0.333333
237	Female	3.3333	1.21212	27.9	2.5	0.5
238	Male	3.25	1.365	29.1	0	0
239	Male	3	1.40244	25.1	0.714286	0
240	Female	3.1667	1.25532	24.7	0.428571	0.333333
241	Female	3.1667	1.06667	24.5	0	NA
242	Male	3.5	1.07609	23.1	0	0
243	Female	3	1.34839	30.5	1.71429	0
244	Female	3.5	1.15909	22.55	0	4
245	Female	3.4167	1.10843	25.5	2.25	0
246	Female	3.6667	1.18103	26.15	2	0
247	Male	3.8333	1.02976	20.25	3	0
248	Male	1.5	1.60448	30.2	1.14286	0.666667
249	Female	3.75	1.27215	25.25	2	2
250	Male	3	1.40667	29.7	0	0
251	Male	3.8333	1.30151	26	3.14286	0
252	Female	3.5	1.28082	26.6	0.714286	0.666667
253	Male	3.8333	1.46729	27.65	0.142857	0.333333
254	Female	3.6667	1.28042	29.05	0	3
255	Male	3.8333	1.2	23.65	0	0
256	Female	3.8333	1.30303	22.6	NA	4
257	Male	2.25	1.21154	26	4	0
258	Female	1.25	1.15569	22.45	0	0
259	Male	4.25	1.12717	26.9	0	1
260	Female	3.9167	1.24405	25.65	3	0
261	Male	3.8333	1.02857	19.15	3.25	0.5
262	Male	4.25	0.958824	26.365	0.666667	0
263	Male	3.9167	1.18579	25.75	1.2	1
264	Male	4	1.25	35.4	0	1
265	Female	4.1667	1.29231	25.7	0.142857	NA
266	Female	4.3333	1.31293	23.65	0	0
267	Female	4.0833	1.13636	20.1	0	0
268	Female	4.4167	1.05634	27.1	0	0
269	Male	4.25	1.31953	26.4	0.142857	0
270	Female	4.0833	0.90625	20.85	2	0
271	Male	4.25	1.34646	29.6	3	0.5
272	Female	4.3333	1.2967	20.3	0.571429	0
273	Male	4.1667	1.21053	27.95	3	0.5
274	Male	2.4167	1.08025	23.15	0	0
275	Male	4.25	1.25	26.65	0.5	3.5
276	Male	3.6667	1.16049	28.25	1	2
277	Male	3.6667	1.16667	22.35	2	0.5
278	Female	4.1667	1.25	27.75	0	1
279	Male	4.1667	1.40397	20.4	1.42857	0
280	Female	1.4167	0.99187	26.9	1.42857	1.33333
281	Male	4.3333	1.24265	26.65	1	0.5
282	Male	4.25	1.23571	24.05	3.33333	0.5
283	Female	3.9167	1.30769	28.95	0.714286	1.5
284	Male	4.3333	1.32039	32.45	0.428571	2.33333
285	Female	4.25	1.17751	25.6	1.4	0
286	Male	2.5	1.24627	18.9	0.428571	0.666667
287	Male	4.1667	1.06623	24.45	3.66667	0
288	Male	3.5	1.32292	25	3.25	0
289	Male	0.5	1.20755	26.65	2.5	0
290	Female	1.5	1.4	22.2	0.428571	0
291	Male	4.3333	1.2875	25.45	3	1
292	Male	4.4167	1.30583	27.25	1.4	0
293	Female	4.5	1.18125	29	0	0
294	Female	4.5	1.20548	31.5	3.25	0
295	Male	3.6667	1.2638	24.95	2.5	0
296	Female	3.6667	1.30409	26.35	0.571429	0.333333
297	Male	4.5	1.44186	32.7	0.857143	0
298	Female	4.5	1.28966	26.65	0	0
299	Female	4.6667	1.12042	23.1	4	0
300	Female	4.6667	1.14744	28.85	3	1
301	Female	0.9167	1.20238	24.85	0	0
302	Female	4.8333	1.19266	26.95	3.75	0.5
303	Female	4.8333	1.08861	24.9	0	1
304	Male	4.25	0.994318	24.05	0	0
305	Female	5	0.994624	24.45	0	0
306	Male	5	1.06471	27.6	0.571429	2
307	Male	4.9167	1.37097	25.7	2.66667	0
308	Female	4.9167	1.25641	21.3	0	0
309	Female	5.0833	1.22152	26.7	3	0
310	Male	4.8333	1.16901	24.7	2	0.666667
311	Female	5.0833	1.37705	14.4	0	1
312	Male	4.25	1.24161	30.65	0.714286	1
313	Male	5	1.22297	22.75	0.714286	0
314	Female	5	1.20805	27.8	0.571429	0.666667
315	Female	4.6667	1.11905	27.85	0	0
316	Female	1.3333	1.31667	20.85	1.28571	0.333333
317	Male	5.25	0.855263	27.15	0.285714	3
318	Male	5.25	1.02727	25.25	0	0.333333
319	Male	5.3333	1.33333	25.35	4	0
320	Female	5.25	1.20896	23.75	0.142857	0
321	Female	5.3333	1.24684	22.85	3	0
322	Male	5.3333	1.28319	22.55	1.28571	0
323	Male	1.6667	0.915493	22.2	0.666667	2
324	Female	5.3333	1.59589	23.35	1.85714	0
325	Male	5.1667	1.1	23.95	3.25	0
326	Female	4	1.29213	30.4	0	0
327	Male	1.5833	1.29231	28.15	0	0.5
328	Male	4.6667	1.12651	30.85	0	0
329	Male	3.8333	1.13008	22.75	2	0
330	Male	4.8333	1.11852	23	0.285714	0
331	Female	5.8333	1.03185	26.7	0	0
332	Female	5.75	1.24837	26.15	0.666667	4
333	Male	5.6667	1.21675	23.9	0	0
334	Female	5.5	1.23529	30.15	0	1.33333
335	Female	5.6667	1.22	24.55	0	0
336	Male	5.6667	1.03053	22.35	1.83333	0
337	Male	5.75	1.25954	25.8	0	4
338	Female	6.0833	1.05914	25.7	0.285714	4
339	Male	3.25	1.20492	24.95	0.285714	1.33333
340	Male	6	1.14815	25.35	0	0
341	Female	5.8333	1.4963	28.8	0	3
342	Male	6	1.22335	24.7	0.5	0
343	Female	5.3333	0.932203	25.55	0.25	0
344	Male	5.3333	1.23301	30.6	4	0
345	Female	5.3333	0.946429	17.65	3.85714	0
346	Male	6.0833	1.29747	27.3	2.28571	0.333333
347	Female	6.25	1.3245	30.55	0	3
348	Male	6.1667	1.13615	25.1	0.666667	0
349	Male	6.1667	1.35345	28.4	0.4	0
350	Male	6	1	23.4	0.25	1.5
351	Male	6.4167	1.10465	24.1	0	4
352	Female	4.25	1.27273	30.65	1.5	3
353	Female	6.3333	1.19008	28.65	0.5	2
354	Female	6.1667	1.20548	21.4	0	2
355	Female	6.25	1.24044	27.95	2.5	0
356	Male	6.4167	1.37766	24.6	2.71429	0
357	Male	4.4167	1.19255	27.05	0.833333	0
358	Male	6.8333	1.24342	25.65	4	0
359	Female	6.5833	0.953333	23.85	0.25	2
360	Male	6.9167	1.03883	26.35	3.42857	0
361	Male	6.9167	1.18	22.8	0.4	0
362	Male	6.0833	1.35165	25.45	0.285714	NA
363	Male	6.9167	1.20207	25.4	0	0
364	Male	7.0833	1.18519	28.5	2.16667	0.333333
365	Male	7	1.1625	31.45	0	1
366	Male	7.1667	1.28571	24.35	0.571429	0
367	Female	7.25	1.07947	26.1	0	NA
368	Female	7	1.18333	24.75	0.833333	0.333333
369	Female	7.3333	0.92126	18	3.57143	0.666667
370	Male	7.1667	1.09559	23.5	1.28571	0
371	Male	7.4167	1.14375	26.85	3	1.5
372	Female	7.4167	1.16667	17.3	0.666667	2.66667
373	Female	7.3333	1.15676	20.95	0	3.33333
374	Female	0.5	1.20238	20.7	1.75	0
375	Female	4.5	1.30102	31.4	0.714286	0
376	Female	2.1667	1.21918	24.35	0	2.5
377	Female	7.3333	1.11724	25.95	0	3
378	Female	7.3333	1.12925	26.85	0	0
379	Female	0.5	1.25275	27.15	NA	NA
380	Female	7.3333	1.16774	26.1	0.285714	0
381	Male	7.8333	1.16279	29.55	0	2.66667
382	Female	6.8333	1.20567	24.35	0.75	0
383	Female	7.8333	1.08553	20.05	0	2
384	Male	7.8333	1.04167	23.1	1.57143	0
385	Female	7.8333	0.974026	30.2	1.28571	2
386	Female	7.9167	1.03937	28.45	1	1
387	Female	7.75	1.16374	30.3	2	0.333333
388	Male	7.8333	1.16026	29.85	0	4
389	Male	7.9167	1.376	28.35	1.57143	0
390	Male	7.9167	1.5	23.25	0	2
391	Male	7.9167	1.25862	22.6	2	0
392	Male	7.9167	1.29231	26.05	0.5	0
393	Female	7.8333	1.24096	27.5	0	0
394	Female	8.1667	1.27397	30.35	2	2.33333
395	Female	8.0833	1.25824	24.2	0	3.66667
396	Female	7.75	1.11111	26.55	0.25	0
397	Male	5.8333	1.15135	27	0	0
398	Male	6.1667	1.14228	27.05	0	0
399	Male	8.25	1.10606	23.15	4	0
400	Female	7.3333	0.864516	24.5	2.25	0
401	Male	7.75	1.14615	27.85	0	0
402	Female	8.25	1.2549	24.25	0	0
403	Female	7.8333	1.17797	25.4	0.666667	1.5
404	Male	8.25	1.16	34.55	2	0
405	Male	7.6667	1.09023	22.85	0	0
406	Female	8.3333	1.14907	14.45	2.33333	0.666667
407	Female	8.3333	1.20139	27.85	2.66667	0
408	Female	8.3333	1.44785	25.9	2.8	0
409	Female	8.1667	1.18605	27.4	0	0
410	Female	4.5	1.04819	23.7	1.33333	0
411	Female	0.75	1.14286	24.9	2	0
412	Female	6.75	1.12879	24.4	0.5	0
413	Female	6.75	1.36842	27.95	0	3.5
414	Female	8.0833	1.26712	27.05	2	0
415	Female	8.3333	1.25301	27.4	1	2
416	Female	8.8333	1.1875	26.6	2.8	0
417	Female	8.75	1.33939	28.65	1.57143	0
418	Female	8.5833	1.13986	28.85	0.428571	0.333333
419	Male	9.25	1.19469	25.35	3.14286	2
420	Female	9.1667	1.15033	18.85	0.428571	0
421	Female	8	1.11111	25.85	0.5	1
422	Female	9.0833	1.37647	28.7	0	4
423	Female	9.25	1.30846	26.6	1.14286	0
424	Female	9.1667	1.28485	25.6	0	NA
425	Female	8.4167	1.13986	28	0.428571	0
426	Male	9.1667	1.35976	26.3	2	NA
427	Male	9.5833	1.02083	23.45	4	0
428	Male	9.5	1.43972	25.65	2.14286	0

## Sheet: Study3_code
Study3 code
A1	African wildcats
B1	feral mixed breed
C1	owned domestic mixed breed
D1	owned domestic purebreds
A2	an African wildcat face with either a shorter nose length
A3	an African wildcat face with either smaller eye angle
D2	an image of an owned domestic purebred cat face with either a longer nose length
D3	an image of an owned domestic purebred cat face with either larger eye angle
Q1	A1/B1
Q2	A1/C1
Q3	A1/D1
Q4	B1/C1
Q5	B1/D1
Q6	C1/D1
Q7	A1/A2
Q8	A1/A3
Q9	D1/D2
Q10	D1/D3

## Sheet: Study3
ID	Sex	Q1	Q2	Q3	Q4	Q5	Q6	Q7	Q8	Q9	Q10
1	Male	B1	C1	D1	C1	B1	C1	A1	A3	D1	D3
2	Male	B1	C1	D1	C1	D1	D1	A2	A1	D1	D3
3	Female	B1	C1	D1	C1	D1	C1	A2	A3	D1	D3
4	Female	B1	C1	D1	B1	B1	D1	A1	A3	D1	D1
5	Female	B1	C1	D1	C1	B1	C1	A2	A1	D1	D3
6	Female	B1	C1	D1	C1	D1	C1	A1	A1	D2	D1
7	Female	B1	C1	D1	B1	D1	D1	A2	A1	D1	D1
8	Female	B1	C1	A1	C1	D1	D1	A2	A1	D1	D1
9	Not respond	B1	C1	D1	B1	D1	D1	A2	A1	D1	D3
10	Female	B1	C1	D1	C1	B1	C1	A2	A3	D1	D1
11	Female	B1	C1	A1	C1	D1	C1	A1	A1	D1	D3
12	Female	A1	C1	D1	C1	D1	C1	A2	A3	D1	D1
13	Male	B1	C1	D1	C1	D1	C1	A2	A3	D1	D3
14	Female	B1	C1	D1	C1	D1	D1	A2	A1	D1	D3
15	Male	B1	C1	D1	C1	B1	D1	A1	A1	D1	D1
16	Female	B1	C1	A1	B1	B1	C1	A1	A1	D1	D3
17	Female	B1	C1	D1	C1	B1	C1	A2	A1	D1	D1
18	Female	B1	C1	D1	C1	B1	D1	A2	A1	D1	D1
19	Female	A1	A1	D1	C1	D1	D1	A2	A1	D1	D1
20	Female	B1	C1	D1	C1	D1	C1	A2	A1	D1	D1
21	Female	B1	C1	D1	C1	B1	C1	A2	A3	D1	D3
22	Male	B1	C1	D1	C1	D1	D1	A2	A3	D1	D1
23	Female	B1	C1	D1	C1	B1	D1	A2	A3	D1	D3
24	Female	B1	C1	D1	B1	D1	D1	A2	A3	D1	D1
25	Male	B1	C1	D1	C1	D1	C1	A2	A1	D1	D1
26	Male	B1	C1	D1	B1	B1	C1	A2	A1	D1	D3
27	Female	B1	C1	D1	C1	D1	C1	A2	A3	D1	D1
28	Female	B1	C1	D1	C1	B1	D1	A2	A1	D1	D1
29	Male	A1	C1	D1	C1	D1	D1	A2	A3	D1	D1
30	Male	B1	C1	D1	B1	D1	D1	A2	A3	D1	D1
31	Male	B1	C1	D1	B1	B1	C1	A1	A3	D1	D3
32	Female	B1	C1	D1	B1	B1	C1	A2	A3	D1	D3
33	Female	B1	C1	D1	C1	D1	C1	A2	A1	D1	D3
34	Male	B1	C1	D1	C1	D1	D1	A1	A1	D1	D3
35	Male	A1	C1	D1	C1	B1	C1	A2	A3	D1	D3
36	Male	B1	C1	D1	B1	D1	D1	A2	A3	D1	D1
37	Female	B1	C1	D1	B1	B1	D1	A2	A1	D1	D3
38	Female	B1	C1	D1	B1	B1	C1	A2	A1	D2	D1
39	Female	B1	C1	D1	C1	D1	D1	A2	A3	D1	D3
40	Male	B1	C1	D1	B1	D1	D1	A1	A3	D1	D1
41	Female	B1	C1	D1	B1	B1	C1	A1	A3	D1	D3
42	Female	B1	C1	D1	C1	D1	C1	A2	A3	D1	D3
43	Female	B1	C1	D1	C1	B1	C1	A2	A1	D1	D3
44	Male	B1	C1	D1	C1	B1	C1	A2	A1	D1	D3
45	Male	B1	C1	D1	B1	B1	C1	A1	A3	D1	D1
46	Female	B1	C1	D1	B1	B1	D1	A2	A3	D1	D3
47	Female	A1	C1	A1	C1	B1	C1	A1	A1	D1	D1
49	Female	B1	C1	D1	C1	B1	C1	A2	A3	D1	D3
50	Female	B1	C1	D1	C1	D1	D1	A2	A3	D1	D1
51	Female	B1	C1	D1	C1	B1	C1	A2	A1	D1	D1
52	Female	B1	C1	D1	C1	D1	D1	A2	A1	D1	D1
53	Female	B1	C1	D1	C1	B1	C1	A2	A3	D1	D1
54	Female	B1	C1	D1	C1	B1	C1	A2	A3	D1	D1
55	Male	B1	C1	D1	C1	B1	C1	A2	A3	D1	D3
56	Female	A1	C1	D1	B1	D1	D1	A1	A1	D1	D3
57	Female	B1	C1	D1	C1	D1	D1	A2	A1	D1	D1
58	Female	B1	C1	D1	B1	B1	C1	A2	A1	D1	D1
59	Male	B1	C1	D1	C1	B1	C1	A2	A1	D1	D3
60	Female	B1	C1	D1	C1	D1	C1	A2	A1	D1	D1
61	Female	A1	A1	A1	B1	D1	C1	A2	A3	D1	D1
62	Male	B1	A1	A1	B1	B1	C1	A2	A1	D1	D1
63	Female	B1	C1	D1	C1	B1	D1	A1	A3	D1	D3
64	Male	B1	C1	D1	C1	D1	D1	A2	A3	D2	D3
65	Female	B1	C1	D1	C1	D1	C1	A1	A1	D1	D3
66	Female	A1	A1	A1	C1	B1	C1	A1	A3	D1	D1
67	Female	B1	C1	D1	C1	B1	C1	A2	A3	D1	D1
68	Female	B1	C1	D1	C1	D1	D1	A2	A1	D2	D3
69	Male	B1	C1	A1	C1	B1	C1	A2	A3	D2	D3
70	Female	B1	C1	D1	C1	D1	C1	A2	A3	D1	D1
71	Male	B1	C1	D1	C1	B1	C1	A2	A1	D1	D1
72	Female	B1	C1	A1	B1	B1	D1	A1	A1	D1	D3
73	Male	B1	C1	D1	B1	D1	D1	A2	A3	D1	D3
74	Female	B1	C1	D1	C1	B1	C1	A2	A1	D1	D1
75	Female	B1	C1	D1	B1	B1	C1	A2	A1	D1	D3
76	Female	B1	C1	D1	B1	D1	C1	A1	A3	D1	D1
77	Female	B1	C1	D1	B1	B1	C1	A2	A1	D2	D1
78	Female	A1	C1	D1	C1	D1	C1	A2	A1	D1	D1
79	Male	B1	C1	D1	C1	B1	C1	A1	A1	D1	D3
80	Female	B1	C1	D1	B1	D1	C1	A2	A3	D1	D3
81	Female	B1	C1	D1	C1	B1	C1	A2	A1	D1	D3
82	Female	B1	C1	D1	C1	B1	C1	A1	A3	D1	D3
83	Male	B1	C1	D1	B1	D1	D1	A2	A1	D1	D3
84	Male	B1	C1	D1	C1	B1	C1	A2	A1	D1	D3
85	Male	B1	C1	A1	C1	B1	C1	A2	A3	D1	D1
86	Female	B1	C1	A1	C1	B1	C1	A1	A1	D1	D1
87	Female	B1	C1	D1	C1	D1	D1	A2	A3	D1	D3
88	Female	B1	C1	D1	C1	B1	C1	A1	A1	D1	D1
89	Male	B1	C1	D1	B1	B1	D1	A1	A1	D1	D1
90	Female	B1	C1	D1	B1	B1	C1	A2	A3	D1	D3
91	Female	B1	C1	D1	C1	B1	C1	A2	A3	D1	D3
92	Female	B1	A1	D1	B1	D1	D1	A2	A1	D1	D3
93	Male	B1	C1	D1	C1	B1	C1	A2	A1	D1	D1
94	Male	B1	C1	D1	C1	B1	C1	A2	A3	D1	D3
95	Female	B1	C1	D1	C1	D1	D1	A2	A3	D1	D1
96	Male	B1	C1	D1	C1	B1	C1	A2	A3	D1	D3
97	Female	B1	C1	D1	C1	B1	C1	A1	A3	D1	D3
98	Male	A1	C1	D1	C1	D1	D1	A2	A1	D1	D3
99	Female	B1	C1	A1	B1	B1	D1	A2	A3	D1	D3
100	Male	B1	C1	D1	C1	D1	C1	A2	A3	D1	D1
101	Female	A1	C1	A1	B1	D1	D1	A2	A1	D1	D3
102	Male	B1	C1	D1	B1	B1	D1	A2	A1	D1	D1
103	Female	B1	C1	D1	C1	B1	C1	A2	A1	D1	D1
104	Male	B1	C1	D1	B1	B1	D1	A1	A1	D1	D3
105	Female	B1	C1	D1	C1	B1	C1	A2	A1	D1	D1
106	Male	B1	C1	D1	C1	D1	C1	A2	A1	D1	D1
107	Female	B1	C1	A1	C1	B1	C1	A2	A3	D1	D3
108	Male	B1	C1	D1	C1	D1	D1	A2	A3	D1	D3
109	Female	B1	C1	D1	C1	D1	C1	A2	A1	D1	D3
110	Male	B1	C1	D1	C1	D1	D1	A1	A1	D1	D1
111	Female	B1	A1	D1	B1	B1	D1	A1	A1	D2	D3
112	Female	A1	C1	D1	B1	B1	C1	A1	A3	D2	D1
113	Male	B1	C1	D1	B1	B1	C1	A1	A1	D1	D1
114	Female	B1	C1	D1	B1	B1	C1	A2	A1	D1	D3
115	Female	B1	C1	D1	C1	D1	D1	A2	A3	D1	D3
116	Male	B1	C1	D1	B1	B1	C1	A2	A1	D1	D3
117	Female	B1	C1	D1	C1	D1	D1	A2	A1	D2	D3
118	Male	B1	C1	D1	B1	B1	C1	A1	A1	D1	D1
119	Male	B1	C1	D1	C1	D1	D1	A2	A1	D1	D1
120	Female	B1	A1	D1	B1	B1	C1	A2	A1	D1	D1
121	Female	B1	A1	D1	B1	D1	D1	A2	A1	D1	D1
122	Male	B1	C1	D1	C1	B1	C1	A2	A1	D1	D1
123	Female	B1	C1	D1	C1	D1	C1	A2	A1	D1	D3
124	Male	B1	C1	D1	C1	D1	D1	A2	A3	D1	D3
125	Female	B1	C1	D1	C1	D1	C1	A2	A3	D1	D3
126	Female	B1	C1	D1	B1	B1	D1	A2	A1	D1	D3
127	Female	B1	C1	D1	C1	D1	C1	A2	A1	D1	D3
128	Male	B1	A1	D1	B1	B1	C1	A2	A1	D1	D3
129	Female	B1	C1	D1	C1	D1	C1	A1	A1	D1	D1
130	Male	B1	C1	D1	B1	B1	C1	A1	A1	D1	D1
131	Female	B1	C1	D1	C1	D1	C1	A2	A3	D1	D1
132	Female	A1	A1	D1	B1	B1	D1	A2	A3	D2	D3
133	Not respond	B1	C1	D1	C1	D1	D1	A2	A1	D1	D1
134	Male	B1	C1	D1	C1	B1	C1	A2	A1	D1	D1
135	Female	B1	C1	D1	C1	D1	D1	A2	A1	D1	D1
136	Female	A1	A1	D1	C1	D1	C1	A2	A3	D1	D1
137	Female	B1	C1	D1	C1	B1	D1	A2	A3	D1	D1
138	Female	B1	C1	A1	C1	B1	C1	A2	A1	D1	D3
139	Female	B1	C1	D1	C1	D1	C1	A2	A3	D1	D3
140	Male	B1	C1	D1	B1	B1	D1	A2	A3	D1	D3
141	Male	B1	C1	D1	C1	D1	C1	A2	A3	D1	D1
142	Female	B1	C1	D1	B1	B1	C1	A1	A1	D1	D1
143	Female	B1	C1	D1	C1	B1	C1	A1	A1	D1	D3
144	Female	B1	C1	D1	C1	B1	C1	A1	A3	D1	D3
145	Male	B1	C1	D1	C1	D1	C1	A2	A3	D1	D1
146	Female	B1	C1	D1	C1	B1	C1	A2	A1	D1	D3
147	Female	A1	A1	A1	C1	B1	D1	A1	A1	D1	D3
148	Female	B1	C1	D1	C1	B1	C1	A2	A3	D1	D3
149	Female	B1	C1	D1	C1	B1	C1	A2	A3	D1	D3
150	Male	B1	C1	A1	C1	B1	C1	A1	A1	D1	D3
151	Female	B1	C1	D1	C1	B1	C1	A2	A1	D1	D3
152	Female	B1	C1	D1	B1	D1	D1	A2	A3	D1	D3
153	Female	B1	C1	D1	C1	B1	C1	A2	A3	D1	D3
154	Female	A1	A1	D1	C1	D1	D1	A2	A1	D1	D1
155	Male	B1	C1	D1	C1	B1	C1	A2	A3	D1	D3
156	Female	B1	C1	D1	C1	B1	C1	A2	A1	D1	D1
157	Female	B1	C1	D1	C1	D1	D1	A2	A1	D1	D1
158	Female	A1	C1	D1	C1	D1	D1	A2	A1	D1	D1
159	Male	B1	C1	D1	C1	D1	C1	A2	A3	D1	D3
160	Female	B1	C1	D1	C1	B1	C1	A1	A1	D1	D3
161	Female	A1	A1	A1	C1	B1	D1	A1	A1	D2	D1
162	Female	B1	C1	A1	B1	B1	C1	A2	A1	D2	D3
163	Female	A1	C1	D1	C1	D1	D1	A2	A3	D1	D3
164	Female	A1	C1	A1	C1	D1	D1	A2	A1	D1	D1
165	Female	B1	C1	D1	C1	D1	D1	A2	A3	D2	D3
166	Female	B1	C1	D1	C1	D1	C1	A2	A1	D1	D3
167	Female	B1	C1	D1	C1	D1	C1	A2	A3	D1	D3
168	Female	B1	C1	D1	B1	B1	D1	A1	A1	D1	D3
169	Female	B1	C1	D1	C1	B1	C1	A2	A1	D1	D3
170	Male	B1	C1	A1	B1	D1	C1	A2	A1	D1	D1
171	Female	B1	C1	D1	B1	D1	D1	A1	A1	D1	D3
172	Female	B1	C1	D1	C1	D1	C1	A2	A1	D1	D3
173	Male	B1	C1	D1	C1	D1	C1	A2	A3	D1	D3
174	Female	A1	C1	A1	C1	D1	C1	A2	A1	D1	D1
175	Female	B1	C1	D1	C1	B1	C1	A2	A1	D1	D3
176	Male	B1	C1	D1	C1	D1	C1	A2	A3	D1	D1
177	Female	B1	C1	D1	C1	D1	C1	A1	A3	D1	D1
178	Female	B1	C1	A1	B1	B1	C1	A2	A1	D1	D3
179	Female	B1	C1	D1	C1	D1	C1	A1	A1	D1	D3
180	Male	B1	C1	D1	C1	D1	D1	A2	A3	D1	D3
181	Female	B1	C1	D1	C1	B1	C1	A2	A1	D1	D1
182	Female	B1	C1	D1	C1	B1	C1	A2	A3	D1	D1
183	Female	B1	C1	D1	B1	B1	C1	A1	A3	D1	D1
184	Female	B1	C1	D1	C1	D1	C1	A2	A1	D1	D3
185	Female	B1	C1	D1	B1	D1	D1	A2	A3	D1	D3
186	Female	B1	C1	D1	B1	B1	C1	A1	A3	D1	D1
187	Female	B1	C1	D1	C1	D1	C1	A2	A1	D1	D3
188	Male	B1	C1	D1	C1	B1	C1	A1	A3	D1	D1
189	Female	B1	C1	D1	C1	B1	C1	A2	A1	D1	D1
190	Female	B1	C1	A1	B1	B1	C1	A2	A1	D1	D3
192	Male	B1	C1	D1	C1	B1	C1	A2	A1	D1	D1
193	Female	B1	C1	D1	C1	D1	C1	A1	A3	D1	D1
194	Female	B1	C1	D1	C1	B1	C1	A1	A3	D1	D1
195	Female	B1	C1	D1	B1	B1	C1	A2	A3	D1	D1
196	Female	B1	C1	D1	B1	D1	C1	A2	A1	D1	D3
197	Not respond	A1	A1	A1	C1	B1	C1	A1	A1	D1	D1
198	Female	B1	C1	D1	B1	B1	C1	A2	A3	D1	D3
199	Female	B1	C1	A1	C1	B1	C1	A2	A1	D1	D1
200	Female	B1	C1	D1	C1	D1	C1	A1	A3	D1	D1
201	Female	B1	C1	D1	C1	B1	C1	A2	A3	D1	D3
202	Female	B1	C1	A1	B1	B1	C1	A2	A1	D1	D3
203	Female	B1	C1	D1	C1	D1	D1	A2	A3	D1	D3
204	Male	B1	C1	D1	C1	B1	D1	A2	A3	D1	D3
205	Female	B1	C1	D1	C1	B1	C1	A2	A1	D1	D3
206	Male	B1	C1	D1	C1	D1	D1	A1	A3	D1	D1
207	Female	B1	C1	D1	C1	D1	C1	A2	A1	D1	D1
208	Female	B1	C1	D1	B1	B1	C1	A2	A1	D1	D1
209	Female	B1	C1	D1	C1	B1	C1	A1	A3	D1	D1
210	Female	B1	C1	D1	C1	D1	C1	A2	A1	D1	D3
211	Female	B1	C1	D1	C1	B1	C1	A2	A3	D1	D1
212	Female	B1	A1	D1	C1	D1	C1	A2	A1	D1	D3
213	Female	A1	A1	A1	C1	D1	C1	A2	A3	D1	D3
214	Female	B1	C1	D1	B1	D1	D1	A2	A1	D1	D1
215	Female	B1	C1	D1	C1	B1	C1	A1	A3	D1	D3
216	Female	B1	C1	D1	C1	D1	C1	A1	A3	D1	D1
217	Male	B1	C1	D1	C1	D1	C1	A2	A3	D1	D1
218	Female	A1	C1	A1	B1	B1	D1	A2	A1	D1	D1
219	Female	B1	A1	A1	B1	B1	D1	A2	A1	D1	D1
220	Female	B1	C1	D1	B1	B1	C1	A2	A1	D1	D1
221	Female	A1	A1	A1	B1	B1	D1	A2	A1	D1	D3
222	Female	B1	C1	D1	B1	B1	C1	A2	A1	D1	D1
223	Male	B1	C1	D1	C1	D1	C1	A1	A1	D1	D3
224	Female	B1	C1	D1	C1	D1	C1	A1	A3	D1	D3
225	Female	B1	C1	D1	B1	B1	C1	A1	A1	D1	D1
226	Male	B1	C1	D1	C1	D1	C1	A2	A1	D1	D1
227	Male	B1	C1	D1	C1	B1	C1	A1	A1	D1	D3
228	Female	A1	C1	D1	C1	D1	C1	A2	A3	D1	D3
229	Male	B1	C1	D1	B1	B1	C1	A2	A3	D2	D1
230	Female	B1	A1	A1	C1	B1	D1	A1	A1	D1	D1
231	Female	B1	C1	D1	C1	B1	C1	A2	A3	D1	D1
232	Female	B1	C1	D1	B1	B1	C1	A2	A3	D1	D3
233	Female	B1	C1	D1	C1	B1	C1	A2	A1	D1	D3
234	Male	B1	C1	D1	C1	D1	C1	A1	A3	D1	D3
235	Female	B1	C1	D1	B1	B1	D1	A2	A1	D1	D1
236	Male	B1	C1	D1	B1	B1	D1	A2	A3	D2	D3
237	Female	B1	C1	D1	B1	D1	D1	A2	A1	D1	D3
238	Male	B1	C1	D1	C1	B1	C1	A2	A1	D1	D3
239	Male	B1	C1	D1	C1	D1	D1	A2	A1	D1	D1
240	Female	B1	C1	D1	C1	B1	D1	A1	A3	D1	D1
241	Female	A1	A1	A1	C1	B1	C1	A2	A1	D2	D1
242	Female	A1	C1	D1	C1	B1	C1	A2	A3	D1	D3
243	Female	B1	C1	D1	C1	B1	C1	A2	A3	D1	D3
244	Female	B1	C1	D1	C1	D1	D1	A2	A1	D1	D3
245	Female	B1	C1	D1	C1	B1	C1	A2	A3	D1	D1
246	Female	A1	C1	D1	C1	D1	C1	A2	A3	D1	D3
247	Female	B1	C1	D1	C1	D1	D1	A2	A3	D1	D3
248	Female	A1	C1	D1	C1	B1	C1	A1	A1	D1	D3
249	Female	B1	C1	D1	C1	D1	C1	A2	A3	D1	D1
250	Female	B1	C1	D1	C1	D1	C1	A2	A3	D1	D1
251	Male	B1	C1	D1	C1	D1	C1	A2	A3	D1	D1
252	Female	A1	C1	A1	B1	D1	C1	A2	A1	D1	D1
253	Female	B1	C1	D1	C1	D1	D1	A1	A3	D1	D3
254	Female	B1	C1	D1	B1	B1	C1	A2	A1	D1	D3
255	Female	B1	C1	D1	C1	D1	D1	A2	A3	D1	D3
256	Female	B1	C1	D1	C1	D1	D1	A2	A3	D1	D1
257	Female	B1	C1	D1	C1	D1	D1	A2	A3	D1	D3
258	Male	B1	C1	D1	B1	D1	C1	A1	A1	D2	D3
260	Male	B1	C1	A1	C1	D1	D1	A2	A1	D1	D3
261	Female	B1	C1	D1	C1	D1	D1	A2	A1	D1	D1
262	Female	B1	C1	D1	C1	B1	C1	A2	A3	D1	D3
263	Female	A1	C1	D1	C1	D1	C1	A2	A1	D1	D1
264	Female	B1	C1	A1	B1	B1	C1	A1	A1	D1	D3
265	Female	B1	C1	D1	C1	D1	C1	A2	A3	D1	D1
266	Female	A1	C1	D1	C1	B1	C1	A2	A3	D1	D3
267	Male	A1	A1	A1	C1	D1	D1	A2	A1	D1	D3
268	Female	B1	C1	D1	B1	D1	C1	A1	A3	D1	D1
269	Male	B1	C1	A1	B1	B1	C1	A2	A3	D1	D1
270	Female	B1	C1	A1	C1	B1	C1	A1	A1	D1	D1
271	Female	B1	C1	D1	B1	B1	C1	A1	A1	D1	D1
272	Female	B1	C1	D1	B1	B1	C1	A1	A1	D1	D1
273	Male	B1	C1	D1	B1	B1	C1	A1	A1	D1	D1
274	Female	B1	C1	D1	B1	B1	D1	A1	A1	D1	D3
275	Male	B1	C1	D1	B1	B1	C1	A1	A1	D1	D1
276	Female	B1	C1	D1	B1	B1	D1	A2	A1	D1	D3
277	Female	B1	C1	D1	C1	D1	C1	A2	A1	D1	D1
278	Female	B1	C1	D1	C1	D1	D1	A2	A1	D1	D1
279	Female	B1	C1	D1	C1	D1	D1	A2	A3	D1	D1
280	Female	B1	C1	D1	B1	D1	D1	A2	A3	D1	D3
281	Female	B1	C1	D1	C1	D1	D1	A2	A3	D1	D3
282	Female	A1	C1	D1	B1	D1	D1	A2	A3	D1	D1
283	Female	B1	C1	D1	C1	B1	C1	A2	A1	D1	D3
284	Female	B1	C1	D1	C1	D1	C1	A2	A1	D1	D1
285	Female	B1	C1	D1	B1	D1	D1	A2	A1	D1	D1
286	Female	B1	C1	D1	C1	B1	C1	A1	A1	D1	D3
287	Female	B1	C1	D1	C1	D1	C1	A2	A3	D1	D3
288	Female	B1	C1	D1	C1	B1	C1	A1	A1	D1	D1
289	Female	B1	C1	D1	C1	B1	D1	A2	A1	D1	D1
290	Female	B1	C1	D1	C1	D1	C1	A2	A1	D1	D3
291	Female	B1	C1	D1	C1	B1	C1	A1	A1	D1	D3
292	Female	B1	C1	D1	C1	D1	D1	A2	A1	D1	D1
293	Female	B1	C1	D1	C1	B1	C1	A2	A1	D1	D3
294	Female	B1	C1	D1	C1	D1	D1	A2	A3	D1	D1
295	Female	A1	A1	A1	B1	D1	D1	A1	A3	D1	D1
296	Female	B1	C1	D1	B1	B1	C1	A2	A3	D1	D3
297	Female	B1	C1	D1	B1	B1	C1	A2	A1	D1	D1
298	Female	B1	C1	D1	C1	B1	C1	A2	A1	D1	D1
299	Female	B1	C1	D1	B1	B1	C1	A2	A1	D1	D1
300	Female	B1	C1	D1	B1	B1	C1	A2	A3	D1	D1
301	Female	B1	C1	D1	C1	B1	C1	A1	A1	D1	D1
302	Female	B1	C1	D1	C1	B1	C1	A2	A1	D1	D1
303	Female	B1	C1	D1	C1	D1	D1	A2	A3	D1	D1
304	Male	B1	C1	D1	C1	B1	C1	A2	A1	D1	D3
305	Female	A1	C1	D1	C1	B1	C1	A1	A3	D1	D1
306	Female	A1	A1	D1	C1	D1	D1	A2	A1	D1	D3
307	Female	A1	C1	A1	C1	D1	C1	A2	A1	D2	D3
308	Female	B1	C1	D1	C1	B1	C1	A2	A1	D1	D3
309	Female	A1	C1	D1	C1	D1	D1	A2	A1	D1	D3
310	Female	B1	C1	D1	B1	D1	C1	A2	A1	D1	D3
311	Female	B1	C1	D1	C1	D1	D1	A2	A3	D1	D3
312	Female	B1	C1	D1	C1	D1	C1	A2	A3	D1	D3
313	Female	B1	C1	D1	C1	D1	C1	A1	A1	D1	D1
314	Female	B1	C1	D1	C1	D1	C1	A2	A3	D1	D3
315	Female	B1	C1	D1	C1	B1	C1	A2	A3	D1	D3
316	Female	B1	C1	D1	C1	D1	D1	A2	A3	D1	D3
317	Female	B1	C1	D1	C1	D1	D1	A1	A1	D1	D1
318	Female	B1	C1	D1	C1	B1	C1	A1	A1	D1	D3
319	Female	B1	C1	D1	C1	D1	D1	A2	A1	D1	D1
320	Female	B1	C1	A1	B1	B1	C1	A2	A1	D1	D3
321	Female	B1	C1	D1	B1	D1	C1	A2	A1	D1	D1
322	Female	B1	C1	D1	B1	B1	C1	A2	A3	D2	D1
323	Female	B1	C1	D1	B1	D1	C1	A1	A1	D1	D1
324	Female	B1	C1	D1	B1	B1	D1	A1	A1	D1	D3
325	Female	A1	C1	D1	C1	D1	D1	A2	A3	D1	D3
326	Female	B1	C1	D1	C1	D1	C1	A1	A1	D1	D1
327	Female	A1	C1	A1	C1	B1	D1	A2	A3	D1	D1
328	Female	B1	C1	D1	B1	D1	D1	A2	A3	D1	D1
329	Female	B1	C1	D1	B1	B1	C1	A1	A3	D1	D1
330	Female	A1	C1	D1	C1	D1	C1	A1	A1	D1	D1
331	Male	A1	C1	D1	C1	D1	D1	A2	A3	D1	D1
332	Male	A1	C1	D1	C1	B1	C1	A1	A1	D1	D1
333	Female	B1	C1	D1	C1	B1	C1	A2	A3	D1	D3
334	Female	B1	C1	D1	C1	D1	C1	A2	A1	D1	D1
335	Female	B1	C1	D1	C1	D1	C1	A2	A3	D1	D3
336	Female	B1	C1	D1	C1	D1	C1	A1	A1	D1	D1
337	Female	A1	C1	A1	B1	B1	C1	A2	A1	D1	D1
338	Female	B1	C1	D1	C1	D1	C1	A2	A1	D1	D3
339	Male	B1	C1	D1	C1	D1	C1	A2	A3	D1	D1
340	Female	B1	C1	D1	B1	B1	C1	A1	A1	D1	D1
341	Male	B1	C1	D1	C1	D1	D1	A2	A1	D1	D1
342	Male	B1	C1	D1	B1	B1	C1	A2	A1	D1	D1
343	Male	B1	C1	D1	C1	D1	C1	A2	A3	D1	D3
344	Female	B1	A1	D1	C1	D1	C1	A2	A3	D1	D1
345	Female	B1	C1	D1	C1	D1	C1	A2	A3	D1	D1
346	Female	B1	C1	D1	B1	B1	D1	A2	A1	D1	D3
347	Male	B1	C1	D1	C1	B1	C1	A2	A1	D1	D1
348	Female	B1	C1	D1	C1	B1	C1	A1	A3	D1	D3
349	Female	B1	C1	D1	C1	D1	C1	A2	A1	D1	D3
350	Female	B1	C1	D1	C1	D1	C1	A2	A3	D1	D3
351	Male	B1	C1	D1	C1	B1	D1	A2	A3	D1	D3
352	Female	B1	C1	D1	B1	D1	D1	A1	A3	D1	D1
353	Female	B1	C1	D1	C1	D1	C1	A2	A3	D1	D3
354	Female	A1	C1	D1	C1	D1	D1	A2	A1	D1	D3
355	Male	A1	C1	D1	B1	B1	C1	A2	A3	D1	D1
356	Female	B1	C1	D1	B1	B1	C1	A2	A1	D1	D1
357	Female	B1	C1	D1	C1	D1	C1	A2	A1	D1	D3
358	Female	B1	C1	D1	C1	D1	D1	A2	A1	D1	D1
